# Supplementary material for: Feeding Aquilaria sinensis Leaves Modulates Lipid Metabolism and Improves the Meat Quality of Goats
Source: MDPI journal article supplement (doi:10.3390/foods12030560), 2023-01-27
Supplement: s1 [file s1]

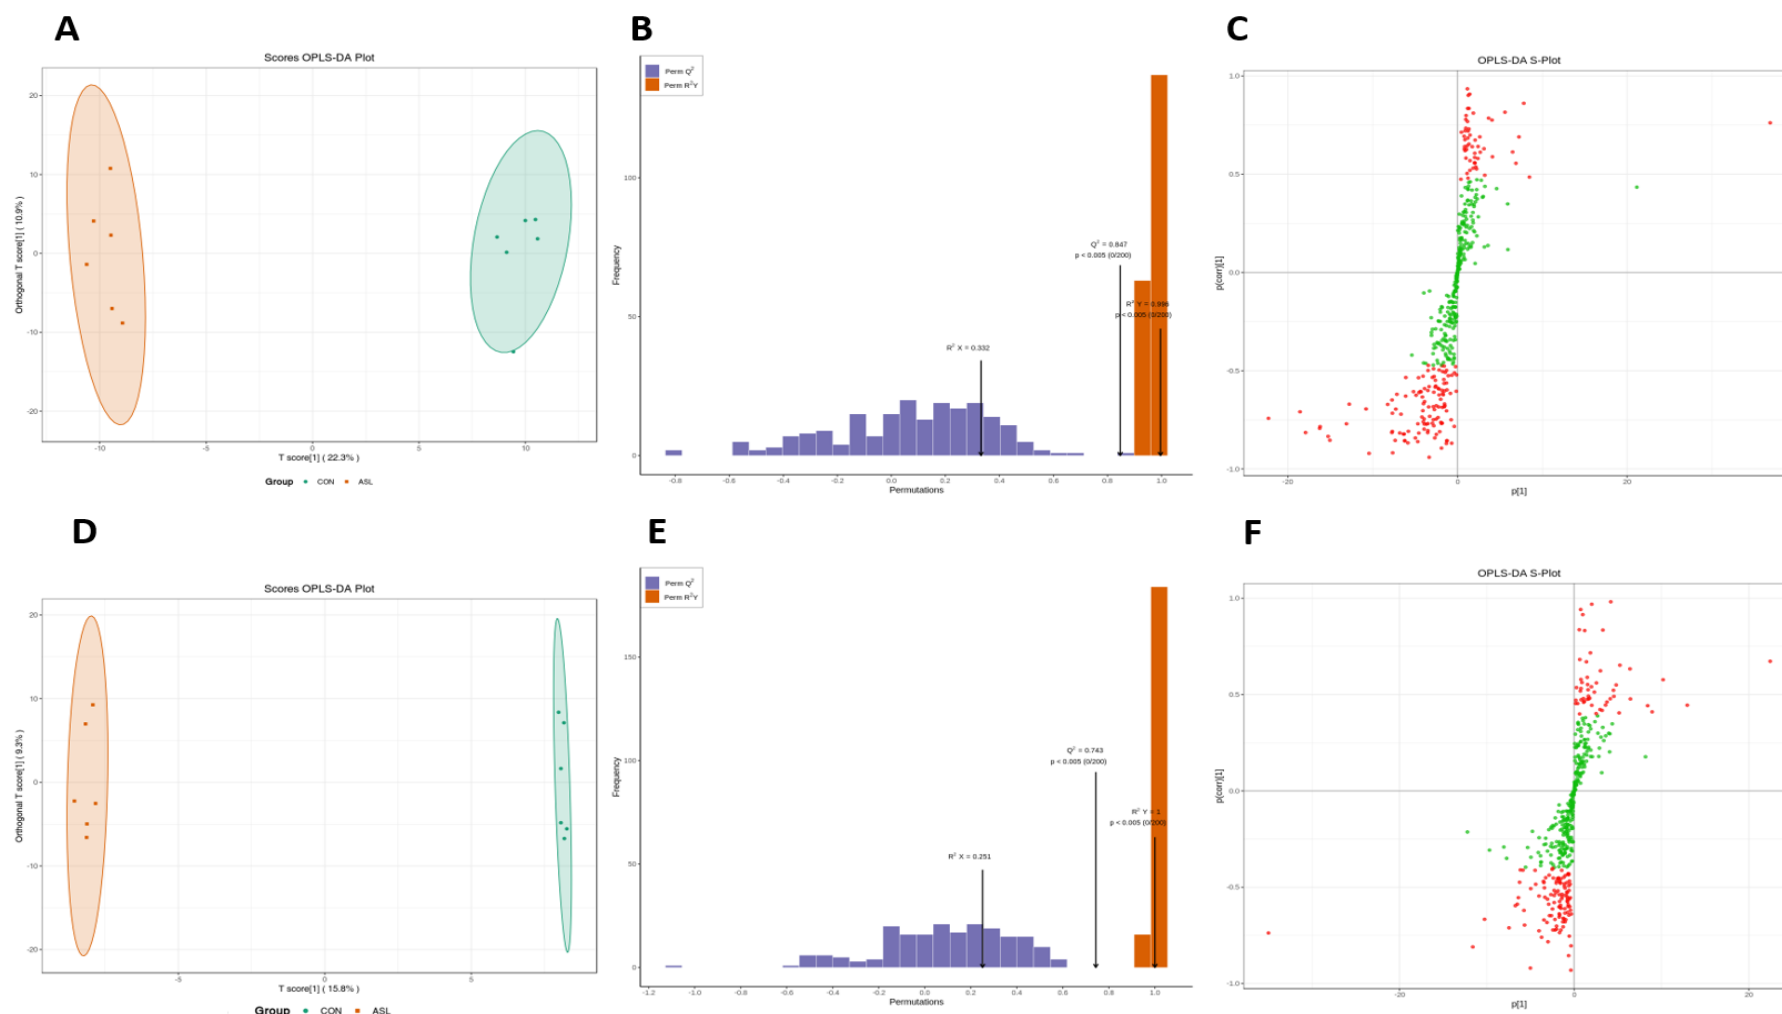

Figure S2. OPLS-DA scores plot of serum and muscle metabolome distribution according to the diet of goats.

(A) OPLS-DA scores plot of serum metabolome distribution according to the diet of goats. (B) Permutation tests for OPLS-DA model of serum metabolome. (C) S-plot for OPLS-DA model of serum metabolome. (D) OPLS-DA scores plot of muscle metabolome distribution according to the diet of goats. (E) Permutation tests for OPLS-DA model of muscle metabolome. (F) S-plot for OPLS-DA model of muscle metabolome. CON: a normal diet, ASL: a diet containing 20% *A. sinensis* leaves. Red indicated  $VIP > 1$ , while green indicated  $VIP \leq 1$ .
