# Supplementary material for: Feeding Aquilaria sinensis Leaves Modulates Lipid Metabolism and Improves the Meat Quality of Goats
Source: Foods. 2023 Jan 27;12(3):560. doi: 10.3390/foods12030560 (PMC9914005; doi:10.3390/foods12030560)
Supplement: Supplementary file 1 [file foods-12-00560-s001.zip › Tables S1-S5.xlsx]

## Sheet: Table S1
Table S1. Bioactive compounds identified from Aquilaria sinensis leaves
Index	Ion mode	Q1 (Da)	Rt (min)	Molecular Weight (Da)	Formula	Ionization model	KEGG ID	Compounds	Class I	Class II	CAS	Level	CXY
GQ512006	Positive	611.16	4.09	610.126	C27H30O16	[M+H]+	-	Quercetin-3-O-glucoside-7-O-rhamnoside	Flavonoids	Flavonols	-	B	6167.8
Li512111	Negative	519.11	4.95	520.1	C24H24O13	[M-H]-	-	Isorhamnetin acetyl hexoside	Flavonoids	Flavonols	-	B	22738
Li512112	Negative	563.1	4.95	564.088	C25H24O15	[M-H]-	-	Isorhamnetin hexose-malonate	Flavonoids	Flavonols	-	B	557630
Li512113	Negative	451.1	3.38	452.076	C20H20O12	[M-H]-	-	Maleoyl-caffeoylquinic acid	Phenolic acids	Phenolic acids	-	B	5769.3
Qingke_Rfmb023-der01-3	Negative	372.09	2.77	373.083	C15H19NO10	[M-H]-	C04720	2,4-Dihydroxy-7-methoxy-1,4-benzoxazin-3-one	Alkaloids	Alkaloids	15893-52-4	A	40641
Qingke_Rfmb056-der14-3	Negative	591.21	4.91	592.186	C29H36O13	[M-H]-	-	(+)-Medioresinol-aceGlu	Lignans and Coumarins	Lignans	-	B	38280
Qingke_Rfmb087-1-1	Negative	311.22	6.51	312.208	C18H32O4	[M-H]-	-	13-Oxo-9-hydroxy-10-octadecenoic acid	Lipids	Free fatty acids	-	B	73746
Qingke_Rfmb090-1-3	Negative	295.23	8.03	296.214	C18H32O3	[M-H]-	-	13-Hydroxy-9,11-octadecadienoic acid	Lipids	Free fatty acids	5204-88-6	A	567220
Qingke_Rfmb091-1-1	Negative	295.23	8.03	296.214	C18H32O3	[M-H]-	-	9-Hydroxy-10,12-octadecadienoic acid	Lipids	Free fatty acids	15514-85-9	A	580610
Qingke_Rfmb262-der14-1	Negative	621.21	4.89	622.195	C30H38O14	[M-H]-	-	Syringaresinol-aceGlu	Lignans and Coumarins	Lignans	-	A	453380
Qingke_Rfmb318-1-2	Positive	144.1	1.39	144.092	C7H14NO2+	[M]+	-	Proline βine(ProBet)	Amino acids and derivatives	Amino acids and derivatives	1195-94-4	A	580230
Qingke_Rfmb319-1-2	Positive	130.09	1.41	129.07	C6H11NO2	[M+H]+	-	Pipecolic acid	Amino acids and derivatives	Amino acids and derivatives	4043-87-2	A	15426000
Qingke_Rfmb320-1-3	Positive	144.1	1.39	143.085	C7H13NO2	[M+H]+	-	1,2-N-Methylpipecolic acid	Amino acids and derivatives	Amino acids and derivatives	7730-87-2	A	1325200
YC512118	Positive	282.28	10.19	281.249	C18H35NO	[M+H]+	-	Octadecenoic amide	Others	Others	-	A	170700
mws0001	Positive	133.05	1.24	132.046	C4H8N2O3	[M+H]+	C00152	L-Asparagine Anhydrous	Amino acids and derivatives	Amino acids and derivatives	70-47-3	B	399070
mws0014	Negative	193.06	4.53	194.049	C10H10O4	[M-H]-	C01494	Ferulic acid	Phenolic acids	Phenolic acids	1135-24-6	B	667930
mws0017	Positive	146.2	1.07	145.144	C7H19N3	[M+H]+	C00315	Spermidine	Alkaloids	Phenolamine	124-20-9	A	14267
mws0018	Positive	203	1.1	202.197	C10H26N4	[M+H]+	C00750	Spermine	Alkaloids	Phenolamine	71-44-3	A	3484300
mws0024	Negative	169.02	2.25	170.015	C7H6O5	[M-H]-	C01424	Gallic acid	Flavonoids	Flavanols	149-91-7	B	379410
mws0042	Negative	305	3.03	306.061	C15H14O7	[M-H]-	C12136	(-)-Epigallocatechin	Flavonoids	Flavanols	970-74-1	B	1424500
mws0049	Positive	307	2.84	306.061	C15H14O7	[M+H]+	C12127	(+)-Gallocatechin	Flavonoids	Flavanols	970-73-0	B	65457
mws0051	Positive	285.07	6.02	284.058	C16H12O5	[M+H]+	C01470	Acacetin	Flavonoids	Flavonoid	480-44-4	A	54313000
mws0054	Negative	289.08	3.49	290.067	C15H14O6	[M-H]-	C06562	Catechin	Flavonoids	Flavanols	154-23-4	B	10572
mws0058	Negative	299.06	6.1	300.053	C16H12O6	[M-H]-	-	Diosmetin	Flavonoids	Flavonoid	520-34-3	A	13808000
mws0063	Positive	271.05	5.95	270.044	C15H10O5	[M+H]+	C06563	Genistein	Flavonoids	Isoflavones	446-72-0	B	14771
mws0066	Negative	315.06	6.31	316.047	C16H12O7	[M-H]-	C10084	Isorhamnetin	Flavonoids	Flavonols	480-19-3	A	517860
mws0072	Positive	433.11	4.25	432.088	C21H20O10	[M+H]+	-	Apigenin 5-O-glucoside	Flavonoids	Flavonoid	28757-27-9	B	3601300
mws0089	Negative	447.09	4.65	448.082	C21H20O11	[M-H]-	-	Kaempferol 7-O-glucosdie	Flavonoids	Flavonols	16290-07-6	B	1286900
mws0091	Negative	463.09	4.48	464.076	C21H20O12	[M-H]-	-	Isoquercitrin	Flavonoids	Flavonols	482-35-9	B	36066
mws0102	Negative	160.05	4.82	161.042	C9H7NO2	[M-H]-	-	Indole-5-carboxylic acid	Alkaloids	Plumerane	1670-81-1	B	113840
mws0119	Negative	227.2	9.85	228.19	C14H28O2	[M-H]-	-	Myristic Acid	Lipids	Free fatty acids	544-63-8	A	17380000
mws0120	Positive	258.11	1.26	257.103	C8H20NO6P	[M+H]+	-	Choline alfoscerate	Lipids	PC	28319-77-9	B	12047
mws0129	Positive	285.07	7.34	284.058	C16H12O5	[M+H]+	C10046	Genkwanin	Flavonoids	Flavonoid	437-64-9	B	49139000
mws0145	Negative	151.05	4.59	152.041	C8H8O3	[M-H]-	-	2-Methoxybenzoic acid	Phenolic acids	Phenolic acids	529-75-9	B	21880
mws0147	Negative	117.1	2.59	118.055	C5H10O3	[M-H]-	-	3-Hydroxy-3-methyl butyric acid	Organic acids	Organic acids	625-08-1	B	88522
mws0178	Negative	353.1	3.24	354.079	C16H18O9	[M-H]-	C00852	Chlorogenic acid	Phenolic acids	Phenolic acids	327-97-9	B	64605
mws0179	Negative	367	4.17	368.093	C17H20O9	[M-H]-	-	Chlorogenic acid methyl ester	Phenolic acids	Phenolic acids	29708-87-0	B	8278.5
mws0180	Negative	153	3.07	154.021	C7H6O4	[M-H]-	C00628	2,5-Dihydroxybenzoic acid	Phenolic acids	Phenolic acids	490-79-9	B	2678600
mws0183	Negative	153.1	3.05	154.021	C7H6O4	[M-H]-	C00230	Protocatechuic acid	Flavonoids	Flavanols	99-50-3	B	3303500
mws0192	Negative	117.03	1.81	118.021	C4H6O4	[M-H]-	C00042	Succinic acid	Organic acids	Organic acids	110-15-6	A	9734200
mws0193	Positive	190.1	1.33	189.099	C7H15N3O3	[M+H]+	C02427	L-Homocitrulline	Amino acids and derivatives	Amino acids and derivatives	1190-49-4	B	27809
mws0198	Negative	179	1.26	180.053	C6H12O6	[M-H]-	C00031	D-(+)-Glucose	Others	Saccharides and Alcohols	50-99-7	B	516850
mws0208	Negative	145.06	3.13	146.049	C6H10O4	[M-H]-	C06104	Adipic Acid	Organic acids	Organic acids	124-04-9	A	763810
mws0216	Positive	132.06	1.26	131.05	C5H9NO3	[M+H]+	C01157	Trans-4-Hydroxy-L-proline	Amino acids and derivatives	Amino acids and derivatives	51-35-4	A	1961000
mws0219	Negative	132	1.21	133.03	C4H7NO4	[M-H]-	C00049	L-AsparticAcid	Amino acids and derivatives	Amino acids and derivatives	56-84-8	B	1594400
mws0221	Positive	241	1.27	240.012	C6H12N2O4S2	[M+H]+	C00491	L-(-)-Cystine	Amino acids and derivatives	Amino acids and derivatives	56-89-3	A	15684
mws0227	Positive	132.1	1.7	131.085	C6H13NO2	[M+H]+	C00123	L-Leucine	Amino acids and derivatives	Amino acids and derivatives	61-90-5	A	392500
mws0230	Positive	120	1.31	119.05	C4H9NO3	[M+H]+	C00188	L-(-)-Threonine	Amino acids and derivatives	Amino acids and derivatives	72-19-5	A	451350
mws0232	Positive	377	3.71	376.12	C17H20N4O6	[M+H]+	C00255	Riboflavin	Others	Vitamin	83-88-5	A	301520
mws0237	Negative	187.1	4.93	188.093	C9H16O4	[M-H]-	C08261	Anchoic Acid	Organic acids	Organic acids	123-99-9	B	771570
mws0248	Negative	243.1	1.69	244.058	C9H12N2O6	[M-H]-	C00299	Uridine	Nucleotides and derivatives	Nucleotides and derivatives	58-96-8	A	368440
mws0250	Positive	182.1	1.63	181.065	C9H11NO3	[M+H]+	C00082	L-(-)-Tyrosine	Amino acids and derivatives	Amino acids and derivatives	60-18-4	A	8668200
mws0254	Positive	156.1	1.18	155.061	C6H9N3O2	[M+H]+	C00135	L-Histidine	Amino acids and derivatives	Amino acids and derivatives	71-00-1	B	441930
mws0255	Positive	112	1.25	111.038	C4H5N3O	[M+H]+	C00380	Cytosine	Nucleotides and derivatives	Nucleotides and derivatives	71-30-7	A	223630
mws0256	Positive	118.1	1.34	117.07	C5H11NO2	[M+H]+	C00183	L-Valine	Amino acids and derivatives	Amino acids and derivatives	72-18-4	B	3552100
mws0258	Positive	132	1.73	131.085	C6H13NO2	[M+H]+	C00407	L-Isoleucine	Amino acids and derivatives	Amino acids and derivatives	73-32-5	A	331150
mws0260	Positive	175	1.23	174.1	C6H14N4O2	[M+H]+	C00062	L-(+)-Arginine	Amino acids and derivatives	Amino acids and derivatives	74-79-3	A	530210
mws0263	Negative	128.03	1.42	129.036	C5H7NO3	[M-H]-	-	L-PyroglutamicAcid	Amino acids and derivatives	Amino acids and derivatives	98-79-3	B	5968.5
mws0264	Negative	341	1.22	342.096	C12H22O11	[M-H]-	-	D-(+)-TrehaloseAnhydrous	Others	Saccharides and Alcohols	99-20-7	A	387270
mws0275	Negative	133	1.47	134.015	C4H6O5	[M-H]-	C00497	L-(-)-Malic acid	Organic acids	Organic acids	636-61-3	A	17458000
mws0277	Negative	191	1.63	192.053	C7H12O6	[M-H]-	C00296	Kinic acid	Organic acids	Organic acids	77-95-2	A	1563700
mws0281	Negative	191	1.34	192.018	C6H8O7	[M-H]-	C00158	Citric Acid	Organic acids	Organic acids	77-92-9	A	72820000
mws0282	Negative	203	2.97	204.08	C11H12N2O2	[M-H]-	C00078	L-Tryptophan	Amino acids and derivatives	Amino acids and derivatives	73-22-3	A	3377700
mws0289	Negative	478.1	7.99	479.268	C23H46NO7P	[M-H]-	-	LysoPE 18:1	Lipids	LPE	89576-29-4	B	14257
mws0344	Negative	165.05	1.45	166.038	C5H10O6	[M-H]-	-	D-Xylonic acid	Organic acids	Organic acids	526-91-0	A	1339600
mws0345	Negative	128.07	1.49	129.07	C6H11NO2	[M-H]-	-	Pipecolinic acid	Organic acids	Organic acids	535-75-1	A	4596.7
mws0359	Negative	241.22	10.38	242.205	C15H30O2	[M-H]-	-	Pentadecanoic Acid	Lipids	Free fatty acids	1002-84-2	B	147660
mws0361	Negative	253.22	9.85	254.205	C16H30O2	[M-H]-	C08362	Palmitoleic Acid	Lipids	Free fatty acids	373-49-9	B	39740
mws0366	Negative	277.22	9.78	278.205	C18H30O2	[M-H]-	-	γ-Linolenic Acid	Lipids	Free fatty acids	506-26-3	A	18259000
mws0367	Negative	277.1	9.56	278.205	C18H30O2	[M-H]-	C06427	α-Linolenic Acid	Lipids	Free fatty acids	463-40-1	A	40541
mws0376	Negative	115	1.61	116.006	C4H4O4	[M-H]-	C00122	Fumaric acid	Organic acids	Organic acids	110-17-8	B	128400
mws0383	Negative	267.23	10.47	268.219	C17H32O2	[M-H]-	-	Cis-10-Heptadecenoic Acid	Lipids	Free fatty acids	29743-97-3	B	733140
mws0396	Negative	281.25	11.11	282.234	C18H34O2	[M-H]-	-	Elaidic Acid	Lipids	Free fatty acids	112-79-8	A	11282000
mws0425	Negative	129	2.15	130.021	C5H6O4	[M-H]-	C02226	Citraconic acid	Organic acids	Organic acids	498-23-7	B	52396
mws0438	Negative	151.15	1.26	152.058	C5H12O5	[M-H]-	-	L-Arabitol	Others	Saccharides and Alcohols	7643-75-6	B	9972.4
mws0444	Negative	152.04	1.84	153.036	C7H7NO3	[M-H]-	-	3-Aminosalicylic acid	Phenolic acids	Phenolic acids	570-23-0	B	23116
mws0467	Negative	165.06	4.34	166.055	C9H10O3	[M-H]-	C01744	3-(4-Hydroxyphenyl)-propionic acid	Phenolic acids	Phenolic acids	501-97-3	B	58823
mws0470	Negative	117.02	1.82	118.021	C4H6O4	[M-H]-	C02170	Methylmalonic acid	Organic acids	Organic acids	516-05-2	B	10511000
mws0473	Negative	131.04	2.58	132.035	C5H8O4	[M-H]-	-	2-Methylsuccinic acid	Organic acids	Organic acids	498-21-5	A	540410
mws0474	Negative	229.15	6.62	230.136	C12H22O4	[M-H]-	C02678	Dodecanedioic aicd	Organic acids	Organic acids	693-23-2	A	1426.5
mws0520	Positive	224.1	3.13	223.074	C11H13NO4	[M+H]+	-	N-Acetyl-L-tyrosine	Amino acids and derivatives	Amino acids and derivatives	537-55-3	A	82403
mws0567	Positive	146.09	1.27	145.076	C5H11N3O2	[M+H]+	C01035	4-Guanidinobutyric acid	Organic acids	Organic acids	463-00-3	B	949300
mws0572	Positive	126.1	1.63	125.052	C5H7N3O	[M+H]+	C02376	5-Methylcytosine	Nucleotides and derivatives	Nucleotides and derivatives	554-01-8	B	51382
mws0574	Negative	103.05	2.05	104.041	C4H8O3	[M-H]-	-	α-Hydroxyisobutyric acid	Organic acids	Organic acids	594-61-6	B	11811
mws0576	Negative	103.05	1.89	104.041	C4H8O3	[M-H]-	-	3-Hydroxybutyrate	Organic acids	Organic acids	300-85-6	A	701630
mws0582	Positive	322.4	1.73	321.082	C11H19N3O6S	[M+H]+	C11347	S-(methyl)glutathione	Amino acids and derivatives	Amino acids and derivatives	2922-56-7	B	284340
mws0597	Negative	190.06	3.45	191.05	C10H9NO3	[M-H]-	C05635	5-Hydroxyindole-3-acetic acid	Alkaloids	Plumerane	54-16-0	B	522190
mws0609	Negative	344.2	1.87	345.033	C10H12N5O7P	[M-H]-	C00942	Guanosine 3',5'-cyclic monophosphate	Nucleotides and derivatives	Nucleotides and derivatives	7665-99-8	A	335790
mws0628	Negative	121.04	4.19	122.032	C7H6O2	[M-H]-	C00633	4-Hydroxybenzaldehyde	Phenolic acids	Phenolic acids	123-08-0	B	306490
mws0629	Positive	281.3	2.99	280.092	C13H16N2O5	[M+H]+	-	Asp-phe	Amino acids and derivatives	Amino acids and derivatives	13433-09-5	B	127960
mws0636	Positive	313.4	4.02	312.132	C18H20N2O3	[M+H]+	-	Phe-Phe	Amino acids and derivatives	Amino acids and derivatives	2577-40-4	A	8058
mws0639	Negative	153.2	3.14	154.021	C7H6O4	[M-H]-	C00196	2,3-Dihydroxybenzoic Acid	Organic acids	Organic acids	303-38-8	B	2558500
mws0668	Negative	283	2.27	284.063	C10H12N4O6	[M-H]-	C01762	Xanthosine	Nucleotides and derivatives	Nucleotides and derivatives	146-80-5	B	69532
mws0671	Positive	120.1	1.25	119.05	C4H9NO3	[M+H]+	C00263	L-Homoserine	Organic acids	Organic acids	672-15-1	B	427750
mws0675	Positive	335.1	1.29	334.041	C11H15N2O8P	[M+H]+	C00455	β-Nicotinamide mononucleotide	Nucleotides and derivatives	Nucleotides and derivatives	1094-61-7	B	26527
mws0677	Positive	219	3.73	218.095	C12H14N2O2	[M+H]+	C00978	N-Acetyl-5-hydroxytryptamine	Alkaloids	Alkaloids	1210-83-9	B	189690
mws0724	Negative	298.1	1.98	299.072	C10H13N5O6	[M-H]-	-	8-Hydroxyguanosine	Nucleotides and derivatives	Nucleotides and derivatives	3868-31-3	B	15813
mws0736	Positive	189.1	2.42	188.103	C8H16N2O3	[M+H]+	C02155	N-Glycyl-L-leucine	Amino acids and derivatives	Amino acids and derivatives	869-19-2	A	872990
mws0748	Negative	353.1	2.71	354.079	C16H18O9	[M-H]-	-	1-Caffeoylquinic acid	Phenolic acids	Phenolic acids	1241-87-8	B	12169
mws0749	Negative	137.03	3.55	138.026	C7H6O3	[M-H]-	C00156	4-Hydroxybenzoic acid	Phenolic acids	Phenolic acids	99-96-7	B	4489400
mws0751	Negative	213.2	9.09	214.176	C13H26O2	[M-H]-	-	Tridecanoic Acid	Lipids	Free fatty acids	638-53-9	A	1589
mws0752	Negative	185.16	8.14	186.147	C11H22O2	[M-H]-	-	Undecylic Acid	Lipids	Free fatty acids	112-37-8	A	1358900
mws0805	Negative	308.1	1.37	309.089	C11H19NO9	[M-H]-	-	N-Acetylneuraminic acid	Amino acids and derivatives	Amino acids and derivatives	131-48-6	B	9226.4
mws0813	Negative	128	1.74	129.036	C5H7NO3	[M-H]-	C01879	5-Oxoproline	Amino acids and derivatives	Amino acids and derivatives	149-87-1	A	10245
mws0823	Negative	115	2.49	116.041	C5H8O3	[M-H]-	C00141	3-Methyl-2-Oxobutanoic acid	Organic acids	Organic acids	759-05-7	B	38271
mws0847	Positive	150	1.53	149.063	C6H7N5	[M+H]+	C02216	1-Methyladenine	Nucleotides and derivatives	Nucleotides and derivatives	5142-22-3	A	816560
mws0851	Negative	143.11	7.49	166.086	C8H15NaO2	[M-Na]-	-	Sodium Valproate	Organic acids	Organic acids	1069-66-5	A	732020
mws0853	Negative	209	4.33	210.078	C11H14O4	[M-H]-	C02325	Sinapyl alcohol	Phenolic acids	Phenolic acids	537-33-7	B	1040700
mws0866	Negative	259	1.19	260.016	C6H13O9P	[M-H]-	C00092	D-Glucose 6-phosphate	Others	Saccharides and Alcohols	56-73-5	B	317790
mws0875	Positive	179	1.28	178.032	C5H10N2O3S	[M+H]+	C01419	Cys-Gly	Amino acids and derivatives	Amino acids and derivatives	19246-18-5	A	6135.7
mws0884	Negative	328.1	2.34	329.038	C10H12N5O6P	[M-H]-	C00575	Cyclic AMP	Nucleotides and derivatives	Nucleotides and derivatives	60-92-4	A	1091000
mws0885	Negative	153	3.35	154.021	C7H6O4	[M-H]-	-	2,4-Dihydroxy benzoic acid	Phenolic acids	Phenolic acids	89-86-1	B	137830
mws0889	Negative	135	1.37	136.029	C4H8O5	[M-H]-	-	Threonate	Others	Saccharides and Alcohols	70753-61-6	A	707640
mws0890	Negative	104.03	1.26	105.036	C3H7NO3	[M-H]-	-	Serine	Amino acids and derivatives	Amino acids and derivatives	312-84-5	A	24305
mws0895	Negative	431	4.43	432.088	C21H20O10	[M-H]-	C09126	Genistein 7-Glucoside(Genistin)	Flavonoids	Isoflavones	529-59-9	B	24009
mws0917	Negative	329	6.82	330.061	C17H14O7	[M-H]-	C01265	3,7-Di-O-methylquercetin	Flavonoids	Flavonols	2068-02-2	A	3992000
mws0920	Negative	301	4.88	302.033	C15H10O7	[M-H]-	C10192	Tricetin	Flavonoids	Flavonoid	520-31-0	B	7870
mws0921	Negative	149	4	150.061	C9H10O2	[M-H]-	C02646	p-Coumaryl alcohol	Phenolic acids	Phenolic acids	3690-05-9	B	89992
mws0923	Positive	200.05	3.07	199.032	C9H10ClNO2	[M+H]+	-	L-2-chlorophenylalanine	Amino acids and derivatives	Amino acids and derivatives	103616-89-3	B	13161000
mws0924	Negative	145.06	3.13	146.049	C6H10O4	[M-H]-	-	2-Methylglutaric acid	Organic acids	Organic acids	617-62-9	B	712960
mws0972	Negative	131.08	3.13	132.07	C6H12O3	[M-H]-	-	5-Hydroxyhexanoic acid	Organic acids	Organic acids	185956-02-9	B	28285
mws0976	Negative	243	1.7	244.058	C9H12N2O6	[M-H]-	C02067	β-Pseudouridine	Nucleotides and derivatives	Nucleotides and derivatives	1445-07-4	B	21722
mws0983	Positive	326.31	9.8	325.272	C20H39NO2	[M+H]+	-	N-Oleoylethanolamine	Others	Others	111-58-0	A	2817400
mws0988	Negative	315	6.69	316.047	C16H12O7	[M-H]-	C10176	Rhamnetin(7-O-Methxyl Quercetin)	Flavonoids	Flavonols	90-19-7	B	30905
mws1013	Negative	177	3.69	178.021	C9H6O4	[M-H]-	C09263	Esculetin	Lignans and Coumarins	Coumarins	305-01-1	A	104910
mws1014	Positive	209.2	4.07	208.029	C10H8O5	[M+H]+	C09265	Fraxetin	Lignans and Coumarins	Coumarins	574-84-5	B	10548
mws1015	Negative	339.1	3.21	340.065	C15H16O9	[M-H]-	C09264	Esculin(6,7-DihydroxyCoumarin-6-glucoside)	Lignans and Coumarins	Coumarins	531-75-9	A	298330
mws1050	Positive	148.05	1.32	147.045	C5H9NO4	[M+H]+	C00979	O-Acetylserine	Amino acids and derivatives	Amino acids and derivatives	5147-00-2	A	436600
mws1060	Negative	267.08	1.93	268.068	C10H12N4O5	[M-H]-	-	9-(β-D-Arabinofuranosyl)hypoxanthine	Nucleotides and derivatives	Nucleotides and derivatives	7013-16-3	A	147590
mws1068	Negative	285.05	6.18	286.038	C15H10O6	[M-H]-	C05903	Kaempferol	Flavonoids	Flavonols	520-18-3	A	4233.1
mws1073	Positive	595.2	3.68	594.132	C27H30O15	[M+H]+	-	Apigenin 6,8-C-diglucoside	Flavonoids	Flavonoid	23666-13-9	A	1938200
mws1074	Negative	177.03	3.85	178.021	C9H6O4	[M-H]-	C03093	Daphnetin	Lignans and Coumarins	Coumarins	486-35-1	B	13312
mws1078	Positive	138.05	4.51	137.042	C7H7NO2	[M+H]+	C00108	Anthranilic Acid	Phenolic acids	Phenolic acids	118-92-3	B	175300
mws1080	Negative	341.1	1.25	342.096	C12H22O11	[M-H]-	-	Galactinol	Others	Saccharides and Alcohols	3687-64-7	A	5136000
mws1090	Negative	259	1.28	260.016	C6H13O9P	[M-H]-	-	Glucose-1-phosphate	Others	Saccharides and Alcohols	59-56-3	B	321850
mws1094	Negative	287.06	5.08	288.053	C15H12O6	[M-H]-	C00974	Dihydrokaempferol	Flavonoids	Dihydroflavonol	480-20-6	A	106760
mws1140	Negative	271.07	6.16	272.058	C15H12O5	[M-H]-	C06561	Naringenin chalcone(4,2',4',6'-Tetrahydroxychalcone)	Flavonoids	Chalcones	73692-50-9	A	1616300
mws1155	Negative	181.2	1.28	182.067	C6H14O6	[M-H]-	C00392	Mannitol	Others	Saccharides and Alcohols	87-78-5	B	4678.3
mws1189	Negative	193.1	1.26	194.033	C6H10O7	[M-H]-	C00333	D-Galacturonic acid(Gal A)	Organic acids	Organic acids	91510-62-2	B	53056
mws1195	Positive	179.1	5.98	178.055	C10H10O3	[M+H]+	-	Methyl p-coumarate	Phenolic acids	Phenolic acids	3943-97-3	A	239960
mws1200	Negative	177	6.03	178.055	C10H10O3	[M-H]-	-	Trans-4-Hydroxycinnamic Acid Methyl Ester	Phenolic acids	Phenolic acids	19367-38-5	A	422550
mws1213	Negative	193.1	1.26	194.033	C6H10O7	[M-H]-	-	Aldehydo-D-galacturonate	Organic acids	Organic acids	685-73-4	B	59492
mws1214	Negative	545.11	1.32	546.08	C18H26O19	[M-H]-	-	D-Galactopyranuronate	Organic acids	Organic acids	6037-45-2	B	57830
mws1297	Negative	269.1	4	270.096	C13H18O6	[M-H]-	-	Benzyl β-D-Glucopyranoside	Phenolic acids	Phenolic acids	4304-12-5	B	71383
mws1316	Positive	301.06	6.87	300.053	C16H12O6	[M+H]+	-	Luteolin 7-methyl ether	Flavonoids	Flavonoid	20243-59-8	A	996400
mws1329	Negative	463.09	4.5	464.076	C21H20O12	[M-H]-	-	Gossypitrin	Flavonoids	Flavonols	491-50-9	B	132310
mws1333	Negative	341.12	1.23	342.096	C12H22O11	[M-H]-	C05402	Melibiose	Others	Saccharides and Alcohols	585-99-9	A	775130
mws1336	Positive	138.05	3.24	137.042	C7H7NO2	[M+H]+	-	4-Aminobenzoic acid	Phenolic acids	Phenolic acids	150-13-0	B	21037
mws1337	Positive	220.2	2.78	219.097	C9H17NO5	[M+H]+	C00864	D-Pantothenic Acid	Others	Vitamin	79-83-4	A	2873500
mws1346	Positive	162.07	1.3	161.059	C6H11NO4	[M+H]+	-	DL-2-Aminoadipic acid	Alkaloids	Alkaloids	542-32-5	B	95453
mws1375	Positive	304.15	1.25	303.125	C12H21N3O6	[M+H]+	-	Nicotianamine	Amino acids and derivatives	Amino acids and derivatives	34441-14-0	B	26676
mws1401	Positive	175	1.63	174.089	C7H14N2O3	[M+H]+	C01047	L-theanine	Amino acids and derivatives	Amino acids and derivatives	3081-61-6	B	26885
mws1417	Negative	160	4.89	161.042	C9H7NO2	[M-H]-	-	Indole-3-carboxylic acid	Alkaloids	Plumerane	771-50-6	B	193950
mws1433	Positive	314.1	5.43	313.117	C18H19NO4	[M+H]+	C02717	N-Feruloyltyramine	Alkaloids	Phenolamine	66648-43-9	A	171360
mws1434	Negative	431.11	4.2	432.088	C21H20O10	[M-H]-	C01714	Isovitexin	Flavonoids	Flavonoid carbonoside	29702-25-8	B	2354300
mws1489	Negative	283.26	10.05	284.248	C18H36O2	[M-H]-	-	Stearic Acid	Lipids	Free fatty acids	57-11-4	A	52716000
mws1490	Negative	281.3	9.74	282.234	C18H34O2	[M-H]-	-	Oleic Acid	Lipids	Free fatty acids	112-80-1	A	10744
mws1491	Negative	279.2	11.24	280.219	C18H32O2	[M-H]-	-	Linoleic acid	Lipids	Free fatty acids	60-33-3	B	8343.1
mws1505	Negative	283.1	6.12	284.093	C17H16O4	[M-H]-	C10484	Phenethyl caffeate	Phenolic acids	Phenolic acids	104594-70-9	B	37229
mws1521	Negative	285.1	3.15	286.09	C13H18O7	[M-H]-	C01451	Salicin	Phenolic acids	Phenolic acids	138-52-3	B	63592
mws1570	Positive	132.07	1.29	131.05	C5H9NO3	[M+H]+	C03440	Cis-4-Hydroxy-D-proline	Amino acids and derivatives	Amino acids and derivatives	2584-71-6	A	576730
mws1584	Negative	515.12	3.63	516.105	C25H24O12	[M-H]-	C10445	Cynarin	Phenolic acids	Phenolic acids	30964-13-7	B	4022.1
mws1587	Positive	132.1	1.85	131.085	C6H13NO2	[M+H]+	-	α-Aminocaproic acid	Amino acids and derivatives	Amino acids and derivatives	327-57-1	A	362090
mws1593	Negative	665.1	1.27	666.184	C24H42O21	[M-H]-	C02052	Maltotetraose	Others	Saccharides and Alcohols	34612-38-9	B	13794
mws1610	Negative	471.38	8.27	472.323	C30H48O4	[M-H]-	-	Maslinic acid	Terpenoids	Triterpene	4373-41-5	B	10689
mws1661	Positive	609.18	4.65	608.146	C28H32O15	[M+H]+	C10039	Diosmin	Flavonoids	Flavonoid	520-27-4	B	27449
mws2209	Negative	447.1	4.66	448.082	C21H20O11	[M-H]-	-	Astragalin	Flavonoids	Flavonols	480-10-4	A	1290600
mws2212	Negative	179.04	3.64	180.035	C9H8O4	[M-H]-	C01197	Caffeic acid	Phenolic acids	Phenolic acids	331-39-5	A	3955400
mws2368	Negative	137.07	3.55	138.061	C8H10O2	[M-H]-	-	Tyrosol	Phenolic acids	Phenolic acids	501-94-0	B	8367.6
mws2523	Negative	421.1	1.19	422.06	C12H23O14P	[M-H]-	C00689	Trehalose 6-phosphate	Others	Saccharides and Alcohols	4484-88-2	B	38801
mws2623	Negative	281.25	10.9	282.234	C18H34O2	[M-H]-	-	11-Octadecanoic acid(Vaccenic acid)	Lipids	Free fatty acids	506-17-2	A	3225900
mws4053	Negative	455.36	8.21	456.329	C30H48O3	[M-H]-	C08988	Ursolic acid	Terpenoids	Triterpene	77-52-1	B	46632
mws4085	Negative	223.07	4.51	224.058	C11H12O5	[M-H]-	C00482	Sinapic acid	Phenolic acids	Phenolic acids	530-59-6	B	22259
mws4134	Negative	611.15	1.75	612.121	C20H32N6O12S2	[M-H]-	-	Oxidized Glutathione	Amino acids and derivatives	Amino acids and derivatives	121-24-4	A	15950
mws4170	Negative	179.06	1.32	180.053	C6H12O6	[M-H]-	-	D-Glucose	Others	Saccharides and Alcohols	14431-43-7	B	2771300
mws4176	Positive	237.12	2.79	236.103	C12H16N2O3	[M+H]+	-	L-Alanyl-L-phenylalanine	Amino acids and derivatives	Amino acids and derivatives	1999-45-7	A	428740
mws5035	Positive	279.17	4.04	278.147	C15H22N2O3	[M+H]+	-	Leucylphenylalanine	Amino acids and derivatives	Amino acids and derivatives	56217-82-4	A	573270
mws5037	Positive	203.14	2.9	202.118	C9H18N2O3	[M+H]+	-	Alanylleucine	Amino acids and derivatives	Amino acids and derivatives	1999-42-4	A	210570
mws5038	Negative	341.11	1.32	342.096	C12H22O11	[M-H]-	-	Isomaltulose	Others	Saccharides and Alcohols	13718-94-0	A	840440
mws5041	Positive	189.12	2.36	188.103	C8H16N2O3	[M+H]+	-	Glycylisoleucine	Amino acids and derivatives	Amino acids and derivatives	19461-38-2	A	719970
mws5042	Positive	223.11	2.76	222.089	C11H14N2O3	[M+H]+	-	Glycylphenylalanine	Amino acids and derivatives	Amino acids and derivatives	721-66-4	A	492760
mws5045	Negative	215.17	7.03	216.156	C12H24O3	[M-H]-	-	12-Hydroxydodecanoic acid	Lipids	Free fatty acids	505-95-3	B	9296.8
pmb0149	Positive	351	7.12	350.222	C21H34O4	[M+H]+	-	MAG(18:4)isomer1	Lipids	Glycerol ester	-	A	16114
pmb0160	Positive	353.3	6.53	352.237	C21H36O4	[M+H]+	-	MAG(18:3)isomer5	Lipids	Glycerol ester	-	A	1780800
pmb0164	Positive	355.1	7.38	354.251	C21H38O4	[M+H]+	-	MAG(18:2)isomer1	Lipids	Glycerol ester	-	A	31338
pmb0287	Positive	351.4	6.21	350.222	C21H34O4	[M+H]+	-	MAG(18:4)isomer2	Lipids	Glycerol ester	-	A	7219.4
pmb0296	Positive	357.2	7.8	356.265	C21H40O4	[M+H]+	-	MAG(18:1)isomer2	Lipids	Glycerol ester	-	A	1337600
pmb0374	Positive	136.1	2.39	135.049	C5H5N5	[M+H]+	-	Aminopurine	Alkaloids	Alkaloids	452-06-2	B	470610
pmb0478	Positive	455.1	2.43	454.125	C21H26O11	[M+H]+	-	Coumarin O-rutinoside	Phenolic acids	Phenolic acids	-	B	6396.7
pmb0484	Positive	104.1	1.24	103.091	C5H13NO	[M+H]+	C00114	Choline	Alkaloids	Alkaloids	62-49-7	A	16900000
pmb0530	Positive	664.2	1.64	663.08	C21H27N7O14P2	[M+H]+	C00003	Nicotinic acid adenine dinucleotide	Nucleotides and derivatives	Nucleotides and derivatives	53-84-9	B	171330
pmb0571	Positive	565.1	4.48	564.123	C26H28O14	[M+H]+	-	Apigenin O-hexosyl-O-pentoside	Flavonoids	Flavonoid	-	A	114880
pmb0639	Positive	757.2	3.55	756.175	C33H40O20	[M+H]+	-	8-C-Hexosyl-apigenin O-hexosyl-O-hexoside	Flavonoids	Flavonoid carbonoside	-	B	4915.9
pmb0652	Positive	565.1	4.05	564.123	C26H28O14	[M+H]+	-	C-Hexosyl-apigenin O-pentoside	Flavonoids	Flavonoid carbonoside	-	B	34392
pmb0653	Positive	595.1	4.14	594.132	C27H30O15	[M+H]+	-	Di-C,C-hexosyl-apigenin	Flavonoids	Flavonoid	-	B	24990
pmb0663	Positive	611.1	4.21	610.153	C27H30O16	[M+H]+	-	8-C-Hexosyl-luteolin O-hexoside	Flavonoids	Flavonoid carbonoside	-	B	78208
pmb0682	Positive	801	4.76	800.181	C38H40O19	[M+H]+	-	8-C-Hexosyl-apigenin O-sinapoylhexoside	Flavonoids	Flavonoid carbonoside	-	B	16038
pmb0736	Positive	493.1	4.74	492.105	C23H24O12	[M+H]+	-	Tricin 7-O-hexoside	Flavonoids	Flavonoid	-	A	204330
pmb0767	Positive	302.4	6.3	301.272	C18H39NO2	[M+H]+	C00836	D-erythro-Dihydrosphingosine	Lipids	Sphingolipids	764-22-7	A	80122
pmb0854	Positive	518.3	6.94	517.282	C26H48NO7P	[M+H]+	-	LysoPC 18:3	Lipids	LPC	-	B	152960
pmb0855	Positive	496.3	7.74	495.296	C24H50NO7P	[M+H]+	-	LysoPC 16:0	Lipids	LPC	17364-16-8	B	913940
pmb0856	Positive	480.31	7.8	479.268	C23H46NO7P	[M+H]+	-	LysoPE 18:1(2n isomer)	Lipids	LPE	-	B	17394
pmb0865	Positive	518.2	6.67	517.282	C26H48NO7P	[M+H]+	-	LysoPC 18:3(2n isomer)	Lipids	LPC	-	B	213110
pmb0876	Positive	454.2	7.68	453.253	C21H44NO7P	[M+H]+	-	LysoPE 16:0	Lipids	LPE	53862-35-4	B	7071.9
pmb0889	Positive	279.3	7.91	278.205	C18H30O2	[M+H]+	C08364	Punicic acid	Lipids	Free fatty acids	544-72-9	A	503590
pmb0890	Positive	355.1	9.45	354.251	C21H38O4	[M+H]+	-	MAG(18:2)	Lipids	Glycerol ester	-	A	6288700
pmb0981	Positive	348.2	1.64	347.047	C10H14N5O7P	[M+H]+	C00020	Adenosine 5'-monophosphate	Nucleotides and derivatives	Nucleotides and derivatives	61-19-8	B	205820
pmb0998	Positive	364.1	1.65	363.042	C10H14N5O8P	[M+H]+	C00144	Guanosine 5'-monophosphate	Nucleotides and derivatives	Nucleotides and derivatives	85-32-5	B	6742
pmb1096	Positive	118	2.97	117.053	C8H7N	[M+H]+	C00463	Indole	Alkaloids	Plumerane	120-72-9	A	14315
pmb1562	Positive	351	6.75	350.222	C21H34O4	[M+H]+	-	MAG(18:4)isomer3	Lipids	Glycerol ester	-	B	61930
pmb1605	Positive	353.3	7.55	352.237	C21H36O4	[M+H]+	-	MAG(18:3)isomer3	Lipids	Glycerol ester	-	A	4042700
pmb1656	Positive	353.1	8.85	352.237	C21H36O4	[M+H]+	-	MAG(18:3)isomer4	Lipids	Glycerol ester	-	A	174010
pmb2221	Positive	318.3	7.32	317.266	C18H39NO3	[M+H]+	C12144	4-Hydroxysphinganine	Lipids	Sphingolipids	554-62-1	A	1665400
pmb2325	Positive	353.1	7.33	352.237	C21H36O4	[M+H]+	-	MAG(18:3)isomer2	Lipids	Glycerol ester	-	A	90163
pmb2363	Positive	357.2	7.69	356.265	C21H40O4	[M+H]+	-	MAG(18:1)isomer1	Lipids	Glycerol ester	-	A	1327800
pmb2444	Positive	353.2	9	352.237	C21H36O4	[M+H]+	-	MAG(18:3)isomer1	Lipids	Glycerol ester	-	A	10901000
pmb2591	Negative	245	4.33	246.089	C13H14N2O3	[M-H]-	C03137	Acetyltryptophan	Amino acids and derivatives	Amino acids and derivatives	2280-01-5	B	14112
pmb2778	Negative	295	7.92	296.214	C18H32O3	[M-H]-	-	9,10-EODE	Lipids	Free fatty acids	65167-83-1	A	955170
pmb2786	Negative	293	7.37	294.199	C18H30O3	[M-H]-	-	9-HOTrE	Lipids	Free fatty acids	89886-42-0	B	326390
pmb2787	Negative	293.2	8.12	294.199	C18H30O3	[M-H]-	-	9-KODE	Lipids	Free fatty acids	54232-59-6	B	140170
pmb2792	Negative	293	6.77	294.199	C18H30O3	[M-H]-	-	13-HOTrE(r)	Lipids	Free fatty acids	74784-20-6	B	92289
pmb2799	Negative	295	8.7	296.214	C18H32O3	[M-H]-	-	12,13-EODE	Lipids	Free fatty acids	6799-85-5	B	70528
pmb2871	Negative	315.1	2.4	316.065	C13H16O9	[M-H]-	-	2,5-Dihydroxy benzoic acid O-hexside	Phenolic acids	Phenolic acids	-	A	4188900
pmb2922	Negative	565.1	1.62	566.029	C15H24N2O17P2	[M-H]-	C00029	Uridine 5'-diphospho-D-glucose	Nucleotides and derivatives	Nucleotides and derivatives	133-89-1	A	387300
pmb2940	Negative	385.1	3.65	386.102	C17H22O10	[M-H]-	-	1-O-β-D-Glucopyranosyl sinapate	Phenolic acids	Phenolic acids	78185-48-5	B	9835.4
pmb2991	Negative	739.1	4.22	740.181	C33H40O19	[M-H]-	-	Apigenin O-hexosyl-O-rutinoside	Flavonoids	Flavonoid	-	B	11629
pmb3006	Negative	431.1	4.61	432.088	C21H20O10	[M-H]-	C04608	Apigenin 7-O-glucoside(Cosmosiin)	Flavonoids	Flavonoid	578-74-5	B	199100
pmb3012	Negative	461.1	4.73	462.096	C22H22O11	[M-H]-	-	Chrysoeriol 7-O-hexoside	Flavonoids	Flavonoid	-	A	531900
pmb3013	Negative	519.1	4.78	520.1	C24H24O13	[M-H]-	-	Isorhamnetin O-acetyl-hexoside	Flavonoids	Flavonols	-	B	12342
pmb3066	Negative	481.1	3.02	482.12	C22H26O12	[M-H]-	-	5-O-p-Coumaroyl shikimic acid O-hexoside	Phenolic acids	Phenolic acids	-	B	25063
pmb3072	Negative	481.1	3.63	482.12	C22H26O12	[M-H]-	-	3-O-p-coumaroyl shikimic acid O-hexoside	Phenolic acids	Phenolic acids	-	B	73726
pmb3074	Negative	337.1	3.96	338.085	C16H18O8	[M-H]-	C12208	3-O-p-Coumaroyl quinic acid	Phenolic acids	Phenolic acids	1899-30-5	B	881910
pmb3081	Negative	289.1	1.59	289.99	C6H11PO11	[M-H]-	-	Glucarate O-Phosphoric acid	Others	Saccharides and Alcohols	-	B	5416900
pmd0132	Positive	496.33	7.57	495.296	C24H50NO7P	[M+H]+	-	LysoPC 16:0(2n isomer)	Lipids	LPC	-	B	816500
pme0006	Positive	116.1	1.29	115.056	C5H9NO2	[M+H]+	C00148	L-Proline	Amino acids and derivatives	Amino acids and derivatives	147-85-3	A	80336000
pme0008	Positive	176.1	1.26	175.084	C6H13N3O3	[M+H]+	C00327	L-Citrulline	Amino acids and derivatives	Amino acids and derivatives	372-75-8	B	116240
pme0014	Positive	148.1	1.33	147.045	C5H9NO4	[M+H]+	C00025	L-Glutamic acid	Amino acids and derivatives	Amino acids and derivatives	56-86-0	A	3494600
pme0021	Positive	166	2.49	165.07	C9H11NO2	[M+H]+	C00079	L-Phenylalanine	Amino acids and derivatives	Amino acids and derivatives	63-91-2	A	8659400
pme0026	Positive	147	1.18	146.095	C6H14N2O2	[M+H]+	C00047	L-(+)-Lysine	Amino acids and derivatives	Amino acids and derivatives	56-87-1	A	398550
pme0033	Positive	137	1.63	136.033	C5H4N4O	[M+H]+	C00262	Hypoxanthine	Nucleotides and derivatives	Nucleotides and derivatives	68-94-0	B	10719
pme0040	Positive	136.1	1.62	135.049	C5H5N5	[M+H]+	C00147	Adenine	Nucleotides and derivatives	Nucleotides and derivatives	73-24-5	A	1923400
pme0057	Positive	136	1.31	135.028	C4H9NO2S	[M+H]+	C00155	L-Homocysteine	Amino acids and derivatives	Amino acids and derivatives	6027-13-0	B	87017
pme0109	Positive	212.2	1.72	211.074	C10H13NO4	[M+H]+	C07194	(-)-3-(3,4-Dihydroxyphenyl)-2-methylalanine	Amino acids and derivatives	Amino acids and derivatives	555-30-6	B	180190
pme0120	Positive	118.2	1.3	117.07	C5H11NO2	[M+H]+	C00431	5-Aminovaleric acid	Amino acids and derivatives	Amino acids and derivatives	660-88-8	B	371070
pme0122	Positive	189.2	1.52	188.103	C8H16N2O3	[M+H]+	C02727	N6-Acetyl-L-lysine	Amino acids and derivatives	Amino acids and derivatives	692-04-6	A	80384
pme0124	Positive	173.2	1.29	172.075	C7H12N2O3	[M+H]+	-	Glycyl-L-proline	Amino acids and derivatives	Amino acids and derivatives	704-15-4	A	15387
pme0137	Negative	187.2	1.67	188.069	C7H12N2O4	[M-H]-	-	N-α-Acetyl-L-glutamine	Amino acids and derivatives	Amino acids and derivatives	2490-97-3	A	86391
pme0170	Positive	217.1	1.62	216.108	C8H16N4O3	[M+H]+	-	N-α-Acetyl-L-arginine	Amino acids and derivatives	Amino acids and derivatives	155-84-0	A	74753
pme0181	Positive	170.1	1.22	169.076	C7H11N3O2	[M+H]+	C01152	1-Methylhistidine	Amino acids and derivatives	Amino acids and derivatives	332-80-9	A	13947
pme0183	Positive	152.1	1.35	151.043	C5H5N5O	[M+H]+	-	2-Hydroxy-6-aminopurine	Nucleotides and derivatives	Nucleotides and derivatives	3373-53-3	B	45136
pme0193	Positive	147.07	1.18	146.06	C5H10N2O3	[M+H]+	C00064	L-Glutamine	Amino acids and derivatives	Amino acids and derivatives	56-85-9	B	420860
pme0230	Positive	268.1	2.38	267.084	C10H13N5O4	[M+H]+	C00212	Adenosine	Nucleotides and derivatives	Nucleotides and derivatives	58-61-7	A	8254700
pme0253	Positive	174.1	4	173.094	C8H15NO3	[M+H]+	C02710	N-Acetyl-L-leucine	Amino acids and derivatives	Amino acids and derivatives	1188-21-2	A	43895
pme0256	Negative	151.03	1.67	152.028	C5H4N4O2	[M-H]-	C00385	Xanthine	Nucleotides and derivatives	Nucleotides and derivatives	69-89-6	B	6481.5
pme0257	Negative	111.03	1.5	112.023	C4H4N2O2	[M-H]-	C00106	Uracil	Nucleotides and derivatives	Nucleotides and derivatives	66-22-8	B	46921
pme0264	Positive	243.09	2.58	242.078	C10H14N2O5	[M+H]+	C00214	Thymidine	Nucleotides and derivatives	Nucleotides and derivatives	50-89-5	B	58385
pme0274	Positive	132.09	1.5	131.085	C6H13NO2	[M+H]+	C02378	6-Aminocaproic acid	Organic acids	Organic acids	60-32-2	B	73152
pme0278	Positive	191.09	1.23	190.083	C7H14N2O4	[M+H]+	C00666	2,6-Diaminooimelic acid	Amino acids and derivatives	Amino acids and derivatives	583-93-7	B	18856
pme0281	Negative	165.03	3.5	166.021	C8H6O4	[M-H]-	C06337	Terephthalic acid	Phenolic acids	Phenolic acids	100-21-0	B	1340300
pme0282	Negative	165.03	3.48	166.021	C8H6O4	[M-H]-	C01606	Phthalic acid	Organic acids	Organic acids	88-99-3	B	74800
pme0295	Positive	146.07	2.09	145.065	C6H11NO3	[M+H]+	C02946	4-Acetamidobutyric acid	Organic acids	Organic acids	3025-96-5	B	1963800
pme0434	Negative	577	3.37	578.12	C30H26O12	[M-H]-	-	Procyanidin B2	Tannins	Proanthocyanidins	29106-49-8	A	33882
pme0436	Negative	577.1	3.37	578.12	C30H26O12	[M-H]-	-	Procyanidin B3	Tannins	Proanthocyanidins	23567-23-9	A	28615
pme0444	Positive	493.2	3.37	493.112	C23H25O12	[M]+	C12140	Malvidin 3-O-glucoside(Oenin)	Flavonoids	Anthocyanins	18470-06-9	B	9716.8
pme0460	Positive	291	3.77	290.067	C15H14O6	[M+H]+	C09727	L-Epicatechin	Flavonoids	Flavanols	490-46-0	A	293890
pme0513	Negative	151	1.27	152.058	C5H12O5	[M-H]-	C00379	Xylitol	Others	Saccharides and Alcohols	87-99-0	B	17453
pme0516	Negative	179.16	1.24	180.053	C6H12O6	[M-H]-	C00137	Inositol	Others	Saccharides and Alcohols	87-89-8	B	558530
pme0519	Negative	341	1.28	342.096	C12H22O11	[M-H]-	-	D-(+)-Sucrose	Others	Saccharides and Alcohols	57-50-1	A	3386100
pme1002	Positive	138.08	1.7	137.076	C8H11NO	[M+H]+	C00483	L-Tyramine	Amino acids and derivatives	Amino acids and derivatives	51-67-2	B	180900
pme1086	Negative	306	1.64	307.068	C10H17N3O6S	[M-H]-	C00051	Glutathione reduced form	Amino acids and derivatives	Amino acids and derivatives	70-18-8	B	18954
pme1109	Positive	152	1.65	151.043	C5H5N5O	[M+H]+	C00242	Guanine	Nucleotides and derivatives	Nucleotides and derivatives	73-40-5	A	80838
pme1173	Positive	137	1.87	136.033	C5H4N4O	[M+H]+	-	Allopurinol	Nucleotides and derivatives	Nucleotides and derivatives	315-30-0	B	6764.1
pme1178	Positive	284.09	1.96	283.078	C10H13N5O5	[M+H]+	C00387	Guanosine	Nucleotides and derivatives	Nucleotides and derivatives	118-00-3	A	13031000
pme1184	Positive	268.1	2.18	267.084	C10H13N5O4	[M+H]+	C00330	Deoxyguanosine	Nucleotides and derivatives	Nucleotides and derivatives	961-07-9	B	123650
pme1194	Positive	228	1.63	227.079	C9H13N3O4	[M+H]+	C00881	Deoxycytidine	Nucleotides and derivatives	Nucleotides and derivatives	951-77-9	B	50184
pme1210	Positive	150	1.68	149.042	C5H11NO2S	[M+H]+	C00073	L-Methionine	Amino acids and derivatives	Amino acids and derivatives	63-68-3	B	1272900
pme1228	Positive	221.1	2.08	220.075	C11H12N2O3	[M+H]+	C00643	5-Hydroxy-L-tryptophan	Amino acids and derivatives	Amino acids and derivatives	56-69-9	A	58288
pme1286	Positive	385	1.81	384.103	C14H20N6O5S	[M+H]+	C00021	S-(5'-Adenosy)-L-homocysteine	Amino acids and derivatives	Amino acids and derivatives	979-92-0	B	20478
pme1397	Positive	271	4.25	271.051	C15H11O5	[M]+	C05904	Pelargonidin	Flavonoids	Anthocyanins	134-04-3	B	11123
pme1419	Positive	164	2.27	199.032	C6H14ClNO2S	[M-Cl]+	-	L-Methionine methyl ester	Amino acids and derivatives	Amino acids and derivatives	2491-18-1	B	234710
pme1474	Positive	298	3.35	297.075	C11H15N5O3S	[M+H]+	C00170	5'-Deoxy-5'-(methylthio)adenosine	Nucleotides and derivatives	Nucleotides and derivatives	2457-80-9	A	2882700
pme2019	Negative	149	1.27	150.044	C5H10O5	[M-H]-	-	DL-Arabinose	Others	Saccharides and Alcohols	147-81-9	B	204970
pme2049	Negative	103	2.07	104.041	C4H8O3	[M-H]-	C05984	2-Hydroxybutanoic acid	Organic acids	Organic acids	600-15-7	B	71827
pme2122	Positive	112.08	1.13	111.072	C5H9N3	[M+H]+	C00388	Histamine	Amino acids and derivatives	Amino acids and derivatives	51-45-6	B	27510
pme2237	Negative	181.08	1.25	182.067	C6H14O6	[M-H]-	C01697	Dulcitol	Others	Saccharides and Alcohols	608-66-2	B	21941
pme2268	Positive	138	1.29	137.042	C7H7NO2	[M+H]+	C01004	Trigonelline	Alkaloids	Alkaloids	535-83-1	A	20618000
pme2459	Positive	449.1	4.27	448.082	C21H20O11	[M+H]+	C03951	Luteolin 7-O-glucoside(Cynaroside)	Flavonoids	Flavonoid	5373-11-5	B	1352100
pme2482	Positive	139.1	3.51	138.026	C7H6O3	[M+H]+	C16700	Protocatechuic aldehyde	Flavonoids	Flavanols	139-85-5	B	19501
pme2559	Negative	174	1.69	175.039	C6H9NO5	[M-H]-	C01042	N-Acetylaspartate	Amino acids and derivatives	Amino acids and derivatives	997-55-7	A	85539
pme2563	Negative	249.3	1.71	250.049	C8H14N2O5S	[M-H]-	C00669	γ-Glu-Cys	Amino acids and derivatives	Amino acids and derivatives	636-58-8	A	15455
pme2566	Negative	217	1.64	218.078	C8H14N2O5	[M-H]-	C03740	(5-L-Glutamyl)-L-amino acid	Amino acids and derivatives	Amino acids and derivatives	5875-41-2	A	8096.5
pme2617	Positive	166	1.15	165.036	C5H11NO3S	[M+H]+	-	Methionine sulfoxide	Amino acids and derivatives	Amino acids and derivatives	62697-73-8	B	3635700
pme2634	Positive	118	1.34	117.07	C5H11NO2	[M+H]+	C01826	Norvaline	Amino acids and derivatives	Amino acids and derivatives	760-78-1	B	3601300
pme2693	Positive	131	1.22	130.1	C6H14N2O	[M+H]+	C02714	N-Acetylputrescine	Alkaloids	Alkaloids	18233-70-0	B	432410
pme2743	Positive	194.1	3.88	193.065	C10H11NO3	[M+H]+	C05598	N-Phenylacetylglycine	Amino acids and derivatives	Amino acids and derivatives	500-98-1	A	5460.6
pme2746	Negative	784.2	3.28	785.122	C27H33N9O15P2	[M-H]-	C00016	Flavin adenine dinucleotide(FAD)	Nucleotides and derivatives	Nucleotides and derivatives	146-14-5	B	33371
pme2758	Negative	162	1.28	163.039	C5H9NO5	[M-H]-	C03079	4-Hydroxy-L-glutamic acid	Amino acids and derivatives	Amino acids and derivatives	3913-68-6	A	4228
pme2890	Positive	269	1.31	268.041	C8H16N2O4S2	[M+H]+	C01817	L-Homocystine	Amino acids and derivatives	Amino acids and derivatives	626-72-2	B	313410
pme2914	Negative	161	1.9	162.044	C6H10O5	[M-H]-	C03761	3-Hydroxy-3-methylpentane-1,5-dioic acid	Amino acids and derivatives	Amino acids and derivatives	503-49-1	A	869740
pme2954	Positive	303.04	5.58	302.033	C15H10O7	[M+H]+	C00389	Quercetin	Flavonoids	Flavonols	117-39-5	A	148760
pme3007	Negative	403	1.18	403.985	C9H14N2O12P2	[M-H]-	C00015	Uridine 5’-diphosphate	Nucleotides and derivatives	Nucleotides and derivatives	27821-45-0	B	4657.7
pme3011	Positive	104.06	1.27	103.056	C4H9NO2	[M+H]+	C00334	γ-Aminobutyric acid	Organic acids	Organic acids	56-12-2	B	7142800
pme3017	Positive	104	1.24	103.056	C4H9NO2	[M+H]+	C03665	2-Aminoisobutyric acid	Amino acids and derivatives	Amino acids and derivatives	62-57-7	B	7868600
pme3033	Positive	104	1.25	103.056	C4H9NO2	[M+H]+	C01026	N,N-Dimethylglycine	Amino acids and derivatives	Amino acids and derivatives	1118-68-9	B	4861400
pme3140	Negative	175	4.66	176.041	C10H8O3	[M-H]-	-	6-Hydroxy-4-methylcoumarin	Lignans and Coumarins	Coumarins	2373-31-1	B	303560
pme3154	Negative	147.07	1.8	148.064	C6H12O4	[M-H]-	-	(Rs)-Mevalonic acid	Organic acids	Organic acids	150-97-0	B	117740
pme3184	Positive	332	1.64	331.053	C10H14N5O6P	[M+H]+	C00360	2'-Deoxyadenosine-5'-monophosphate	Nucleotides and derivatives	Nucleotides and derivatives	653-63-4	B	153220
pme3188	Negative	323	1.73	324.021	C9H13N2O9P	[M-H]-	C00105	Uridine 5'-monophosphate	Nucleotides and derivatives	Nucleotides and derivatives	58-97-9	B	79083
pme3193	Negative	116	1.7	117.036	C4H7NO3	[M-H]-	-	N-Acetylglycine	Amino acids and derivatives	Amino acids and derivatives	543-24-8	A	4230.7
pme3207	Negative	141.03	1.19	142.021	C6H6O4	[M-H]-	-	Trans,trans-Muconic acid	Organic acids	Organic acids	3588-17-8	B	94975
pme3211	Negative	463	4.31	464.076	C21H20O12	[M-H]-	C05623	Quercetin 3-O-glucoside(Isotrifoliin)	Flavonoids	Flavonols	21637-25-2	B	145950
pme3337	Positive	384	2.67	383.09	C14H17N5O8	[M+H]+	-	N6-Succinyl Adenosine	Nucleotides and derivatives	Nucleotides and derivatives	4542-23-8	B	329150
pme3382	Negative	160	1.71	161.059	C6H11NO4	[M-H]-	-	N-Acetylthreonine	Amino acids and derivatives	Amino acids and derivatives	17093-74-2	B	65205
pme3388	Positive	189	1.18	188.114	C7H16N4O2	[M+H]+	C01924	H-HomoArg-OH	Amino acids and derivatives	Amino acids and derivatives	156-86-5	B	4098
pme3437	Positive	213.07	4.94	212.058	C10H12O5	[M+H]+	-	Eudesmic acid(3,4,5-trimethoxybenzoic acid)	Phenolic acids	Phenolic acids	118-41-2	B	4030.9
pme3705	Negative	193.14	1.22	194.033	C6H10O7	[M-H]-	C00191	D-Glucoronic acid	Others	Saccharides and Alcohols	6556-12-3	B	61002
pme3732	Positive	244.09	1.32	243.073	C9H13N3O5	[M+H]+	C00475	Cytidine	Nucleotides and derivatives	Nucleotides and derivatives	65-46-3	A	1368700
pme3827	Positive	198.2	1.65	197.059	C9H11NO4	[M+H]+	C00355	3,4-Dihydroxy-DL-phenylalanine	Amino acids and derivatives	Amino acids and derivatives	63-84-3	B	35694
pme3961	Positive	252	2.46	251.089	C10H13N5O3	[M+H]+	C00559	Deoxyadenosine	Nucleotides and derivatives	Nucleotides and derivatives	958-09-8	B	565930
pme3967	Positive	312	2.73	311.107	C12H17N5O5	[M+H]+	-	2-(Dimethylamino)guanosine	Nucleotides and derivatives	Nucleotides and derivatives	2140-67-2	B	115580
pmf0374	Negative	477.1	4.69	478.091	C22H22O12	[M-H]-	-	2,6-Dimethyl-7-octene-2,3,6-triol	Flavonoids	Flavonoid	5041-82-7	B	123870
pmf0392	Negative	315.09	6.15	316.081	C17H16O6	[M-H]-	-	Apigeninidin chloride	Flavonoids	Flavonoid	28590-40-1	B	148720
pmf0516	Negative	421.08	3.66	422.068	C19H18O11	[M-H]-	C10077	Mangiferin	Others	Others	4773-96-0	A	5707400
pmn001367	Negative	315.07	2.39	316.065	C13H16O9	[M-H]-	-	Protocatechuic acid-4-glucoside	Phenolic acids	Phenolic acids	-	A	3867300
pmn001419	Negative	325.09	3.5	326.085	C15H18O8	[M-H]-	-	1-O-[(E)-p-Cumaroyl]-β-D-glucopyranose	Phenolic acids	Phenolic acids	-	A	2486900
pmn001420	Negative	341.08	3.43	342.079	C15H18O9	[M-H]-	-	1-O-[(E)-Caffeoyl]-β-D-glucopyranose	Phenolic acids	Phenolic acids	-	A	1267500
pmn001421	Negative	337.09	3.82	338.085	C16H18O8	[M-H]-	-	3-O-(E)-p-Coumaroyl quinic acid	Phenolic acids	Phenolic acids	87099-71-6	A	510560
pmn001477	Negative	435.1	4.31	436.082	C20H20O11	[M-H]-	-	4-C-β-D-Glucose-1,3,6-trihydroxy-7-methoxyxanthone	Others	Xanthone	-	A	1954600
pmn001492	Negative	187.1	4.97	188.041	C11H8O3	[M-H]-	C18078	Ayapin	Lignans and Coumarins	Coumarins	494-56-4	B	48428
pmn001494	Negative	417.2	5.71	418.142	C22H26O8	[M-H]-	C10889	(+)-Syringaresinol	Lignans and Coumarins	Lignans	21453-69-0	A	1170400
pmn001502	Negative	387.14	5.8	388.133	C21H24O7	[M-H]-	-	Medioresinol	Lignans and Coumarins	Lignans	40957-99-1	B	155070
pmn001505	Negative	763.4	6.59	764.388	C41H64O13	[M-H]-	-	Oleanolic acid-3-O-β-D-pyran xylose(1→3)-β-D-pyran glucuronide	Terpenoids	Triterpene Saponin	-	B	285250
pmn001511	Negative	285.1	3.25	286.09	C13H18O7	[M-H]-	-	3-Hydroxy-5-Methylphenol-1-Oxy-β-D-Glucose	Phenolic acids	Phenolic acids	-	B	3352.5
pmn001521	Negative	437.1	4.05	438.096	C20H22O11	[M-H]-	-	3-Hydroxy-5-Methylphenol-1-Oxy-β-D-(6'-Gallic Acyl)Glucose	Phenolic acids	Phenolic acids	-	B	12698
pmn001578	Negative	255.23	10.72	256.219	C16H32O2	[M-H]-	C00249	Hexadecanoic acid	Phenolic acids	Phenolic acids	57-10-3	A	28924000
pmn001597	Negative	199.17	8.66	200.162	C12H24O2	[M-H]-	C02679	Dodecanoic acid	Lipids	Free fatty acids	143-07-7	A	6772.1
pmn001610	Negative	307.3	11.09	308.248	C20H36O2	[M-H]-	C16525	Eicosadienoic acid	Lipids	Free fatty acids	5598-38-9	A	81150
pmn001627	Negative	331.1	1.92	332.059	C13H16O10	[M-H]-	-	Glucogallin	Phenolic acids	Phenolic acids	58511-73-2	B	796560
pmn001642	Negative	503.1	5.07	504.071	C23H20O13	[M-H]-	-	Kaempferol 3-O-β-(2''-O-acetyl-β-D-glucuronide)	Flavonoids	Flavonols	-	B	5317100
pmn001645	Negative	533.1	4.78	534.08	C24H22O14	[M-H]-	-	Isorhamnetin 3-O-β-(2''-O-acetyl-β-D-glucuronide)	Flavonoids	Flavonols	-	B	183860
pmn001668	Negative	415.1	3.68	416.128	C22H24O8	[M-H]-	-	Apigenin-3-O-α-L-rhamnoside	Flavonoids	Flavonoid	-	B	5077.7
pmn001680	Negative	163.04	2.86	164.041	C9H8O3	[M-H]-	-	Coumaric acid	Phenolic acids	Phenolic acids	500-05-0	A	752900
pmn001682	Negative	179.03	3.77	180.035	C9H8O4	[M-H]-	-	Sorbic acid	Phenolic acids	Phenolic acids	110-44-1	A	1961500
pmn001686	Negative	287.23	6.64	288.208	C16H32O4	[M-H]-	-	10,16-Dihydroxy-palmitic acid	Lipids	Free fatty acids	3233-90-7	A	237370
pmn001688	Negative	295.23	7.97	296.214	C18H32O3	[M-H]-	-	9S-Hyroxy-10E,12E-octadecadienoic acid	Lipids	Free fatty acids	-	A	611200
pmn001689	Negative	311.22	6.35	312.208	C18H32O4	[M-H]-	-	9-Hydroxy-12-oxo-10-octadecenoic acid	Lipids	Free fatty acids	-	B	168700
pmn001690	Negative	327.1	3.9	328.133	C16H24O7	[M-H]-	-	3-Hydroxy-4-isopropylbenzylalcohol 3-glucoside	Phenolic acids	Phenolic acids	-	B	8647.5
pmn001691	Negative	327.22	6.12	328.202	C18H32O5	[M-H]-	-	9,12,13-Trihyroxy-10,15-octadecadienoic acid	Lipids	Free fatty acids	-	A	104180
pmn001694	Negative	329.23	6.41	330.217	C18H34O5	[M-H]-	-	9,10,13-Trihyroxy-11-octadecadienoic acid	Lipids	Free fatty acids	-	A	155010
pmn001706	Negative	471.35	8.29	472.323	C30H48O4	[M-H]-	-	2-Hydroxyoleanolic acid	Terpenoids	Triterpene	26707-60-8	B	271270
pmn001710	Negative	521.13	4.18	522.114	C24H26O13	[M-H]-	-	Rosmarinyl Glucoside	Phenolic acids	Phenolic acids	-	B	93111
pmn001713	Negative	593.17	3.65	594.132	C27H30O15	[M-H]-	-	Luteolin-7-O-β-D-rutinoside	Flavonoids	Flavonoid	-	A	423460
pmn001728	Negative	289.08	4.4	290.112	C15H18N2O4	[M-H]-	-	N-Acetyl-L-tryptophan	Amino acids and derivatives	Amino acids and derivatives	87-32-1	A	11859
pmn001738	Negative	403.1	3.77	404.111	C17H24O11	[M-H]-	-	Oleoside 11-methyl ester	Phenolic acids	Phenolic acids	60539-23-3	B	6670.6
pmp000002	Positive	315.08	6.18	314.067	C17H14O6	[M+H]+	-	Ladanein	Flavonoids	Flavonoid	10176-71-3	B	1741100
pmp000009	Positive	361.09	6.36	360.07	C18H16O8	[M+H]+	-	Centaureidin	Flavonoids	Anthocyanins	17313-52-9	B	16913
pmp000020	Positive	287.09	7.21	286.073	C16H14O5	[M+H]+	C09282	Oxypeucedanin	Lignans and Coumarins	Coumarins	737-52-0	B	14481
pmp000021	Positive	287.1	6.11	286.073	C16H14O5	[M+H]+	-	Isooxypeucedanine	Lignans and Coumarins	Coumarins	5058-15-1	B	51779
pmp000106	Positive	313.1	8.43	312.087	C18H16O5	[M+H]+	-	5,7,4′-Trimethoxyflavone	Flavonoids	Flavonoid	5631-70-9	B	9417.9
pmp000116	Positive	433.1	4.36	432.088	C21H20O10	[M+H]+	C01460	Apigenin-8-C-glucoside	Flavonoids	Flavonoid carbonoside	3681-93-4	A	4882000
pmp000161	Positive	315.08	6.07	314.067	C17H14O6	[M+H]+	-	5,2'-Dihydroxy-7,8-dimethoxyflavone	Flavonoids	Flavonoid	41060-16-6	B	481080
pmp000172	Positive	477.13	5.35	476.111	C23H24O11	[M+H]+	-	5,2'-Dihydroxy-7,8-dimethoxyflavone glycosides	Flavonoids	Flavonoid	-	A	267390
pmp000194	Positive	519.11	4.85	518.085	C24H22O13	[M+H]+	-	Malonyglygenistin	Flavonoids	Isoflavones	-	B	81131
pmp000231	Positive	339.1	3.83	338.085	C16H18O8	[M+H]+	-	Trans-3-O-p-coumaric quinic acid	Phenolic acids	Phenolic acids	-	B	91765
pmp000236	Positive	565.1	4.12	564.123	C26H28O14	[M+H]+	-	Apigenin-6-C-glucose-8-xylcose	Flavonoids	Flavonoid carbonoside	-	B	4137.4
pmp000260	Positive	333.08	2.36	332.059	C13H16O10	[M+H]+	-	6-O-Galloyl-β-D-glucopyranoside	Phenolic acids	Phenolic acids	-	B	19775
pmp000344	Positive	271.06	6.04	270.044	C15H10O5	[M+H]+	-	3’,4’,7-Trihydroxyflavone	Flavonoids	Flavonoid	2150-11-0	B	46872
pmp000411	Positive	565.15	4.07	564.123	C26H28O14	[M+H]+	-	Genistein 8-C-apiosyl(1→6)glucoside	Flavonoids	Flavonoid carbonoside	-	B	23673
pmp000413	Positive	433.11	4.23	432.088	C21H20O10	[M+H]+	C10420	Genistein 8-C-glucoside	Flavonoids	Flavonoid carbonoside	66026-80-0	A	6385400
pmp000437	Positive	443.38	4.55	442.349	C30H50O2	[M+H]+	-	Myricadoil	Terpenoids	Triterpene	-	A	9118
pmp000452	Positive	225.1	3.84	224.127	C13H20O3	[M+H]+	-	Annuionone D	Others	Others	-	A	148610
pmp000479	Positive	252.2	8.79	251.206	C16H29NO	[M+H]+	-	N-isobutyl-2E,4E-dodedienamide	Alkaloids	Alkaloids	-	B	3193.1
pmp000509	Positive	127.03	3.25	126.026	C6H6O3	[M+H]+	C11918	Maltol	Others	Others	118-71-8	A	18114
pmp000545	Positive	355.1	3.37	354.079	C16H18O9	[M+H]+	-	4-Caffeoylquinic acid	Phenolic acids	Phenolic acids	905-99-7	B	144680
pmp000571	Positive	271.06	6.13	270.044	C15H10O5	[M+H]+	C01477	Apigenin	Flavonoids	Flavonoid	520-36-5	A	760120
pmp000572	Positive	287.05	5.58	286.038	C15H10O6	[M+H]+	C01514	Luteolin	Flavonoids	Flavonoid	491-70-3	A	77023
pmp000573	Positive	447.12	5.66	446.102	C22H22O10	[M+H]+	-	Acacetin-7-O-galactoside	Flavonoids	Flavonoid	-	A	1003900
pmp000579	Positive	463.12	4.87	462.096	C22H22O11	[M+H]+	-	Diosmetin-7-O-galactoside	Flavonoids	Flavonoid	-	A	1983600
pmp000585	Positive	519.11	5.03	518.085	C24H22O13	[M+H]+	-	Apigenin-7-O-(6-O-Malonyl Glucoside)	Flavonoids	Flavonoid	-	B	4667.6
pmp000588	Positive	549.12	5.14	548.094	C25H24O14	[M+H]+	-	Diosmetin-7-O-(6'-O-malonyl)-β-D-glucoside	Flavonoids	Flavonoid	-	B	10309
pmp000589	Positive	551.1	4.63	550.074	C24H22O15	[M+H]+	-	Quercetin-7-O-(6'-O-malonyl)-β-D-glucoside	Flavonoids	Flavonols	-	B	125610
pmp000594	Positive	609.18	4.69	608.146	C28H32O15	[M+H]+	-	Diosmetin-7-O-rutin	Flavonoids	Flavonoid	-	B	7525.5
pmp000596	Positive	627.15	3.37	626.12	C27H30O17	[M+H]+	-	Quercetin 3,7-bis-O-β-D-glucoside	Flavonoids	Flavonols	-	B	10134
pmp000605	Positive	449.1	4.42	448.082	C21H20O11	[M+H]+	-	Rhamnone-2-O-B-D-Glucopyranoside from Italy	Quinones	Anthraquinone	-	A	1227800
pmp001006	Positive	287.1	6.19	286.073	C16H14O5	[M+H]+	-	1,3,7-Trimethoxyxanthone	Others	Xanthone	3722-54-1	B	858030
pmp001008	Positive	303.1	6.94	302.067	C16H14O6	[M+H]+	-	1-Hydroxy-2,3,8-trimethoxy-xanthone	Others	Xanthone	-	B	183050
pmp001010	Positive	317.1	6.49	316.081	C17H16O6	[M+H]+	-	1,2,3,7-Tetramethoxyxanthone	Others	Xanthone	22804-52-0	B	4137600
pmp001012	Positive	333.1	6.46	332.076	C17H16O7	[M+H]+	-	6-Hydroxy-1,2,3,7-tetramethoxy-xanthone	Others	Xanthone	-	B	33219
pmp001033	Positive	423.09	3.72	422.068	C19H18O11	[M+H]+	-	Isomangiferin	Others	Xanthone	24699-16-9	A	47169000
pmp001057	Positive	508.23	4.54	490.16	C25H30O10	[M+NH4]+	-	Caffeoyljasminoside C	Terpenoids	Monoterpenoids	-	B	3400.3
pmp001105	Positive	757.22	3.53	756.175	C33H40O20	[M+H]+	-	Kaempferol-3-neohesperidoside-7-glucoside	Flavonoids	Flavonols	-	A	17322
pmp001106	Positive	595.17	3.61	594.132	C27H30O15	[M+H]+	-	Vitexin-2-O-D-glucopyranoside	Flavonoids	Flavonoid carbonoside	-	A	396700
pmp001107	Positive	757.22	3.62	756.175	C33H40O20	[M+H]+	-	Kaempferol-3-rutinoside-7-glucoside	Flavonoids	Flavonols	-	A	22983
pmp001110	Positive	535.14	4.17	534.114	C25H26O13	[M+H]+	-	Apigenin-6-C-β-D-xyloside-8-C-β-Darabinoside	Flavonoids	Flavonoid carbonoside	-	B	5183.6
pmp001119	Positive	273.08	6.14	272.058	C15H12O5	[M+H]+	-	3,5-Dihydroxy-2,4-dimethoxy-9H-fluoren-9-one	Others	Others	-	A	3205.4
pmp001198	Positive	132.1	1.7	131.085	C6H13NO2	[M+H]+	-	6-Deoxyfagomine	Alkaloids	Alkaloids	197449-09-5	A	1544400
pmp001200	Positive	314.1	5.41	313.117	C18H19NO4	[M+H]+	-	Methoxy-N-Caffeoyltyramine	Alkaloids	Phenolamine	-	A	165960
pmp001204	Positive	299.1	7.55	298.073	C17H14O5	[M+H]+	-	Apigenin-7,4'-dimethylether	Flavonoids	Flavonoid	5128-44-9	A	8396500
pmp001248	Positive	428.19	2.62	428.168	C20H30NO9+	[M]+	-	Caffeoylcholine 5-glucoside	Alkaloids	Alkaloids	-	B	32539
pmp001249	Positive	428.19	2.47	428.168	C20H30NO9+	[M]+	-	Caffeoylcholine 6-glucoside	Alkaloids	Alkaloids	-	B	37341
pmp001250	Positive	520.34	7.42	520.304	C26H51NO7P+	[M]+	-	PC(18:2)	Lipids	PC	-	B	204930
pmp001251	Positive	520.34	7.24	520.304	C26H51NO7P+	[M]+	-	PC(18:2)isomer	Lipids	PC	-	B	415730
pmp001256	Positive	314.14	5.41	313.131	C18H19NO4	[M+H]+	-	N-Cis-feruloyltyramine	Alkaloids	Phenolamine	80510-09-4	A	354540
pmp001264	Positive	274.28	6.5	273.243	C16H35NO2	[M+H]+	-	Hexadecylsphingosine	Lipids	Sphingolipids	-	A	10353000
pmp001270	Positive	494.33	7.08	493.282	C24H48NO7P	[M+H]+	-	LysoPC(16:2)	Lipids	LPC	-	B	24418
pmp001271	Positive	679.39	7.32	678.339	C33H58O14	[M+H]+	-	2,3-Dihydroxypropyl-9,12-octadecadienoate-hexose-hexose	Lipids	Free fatty acids	-	A	527810
pmp001273	Positive	520.34	7.43	519.296	C26H50NO7P	[M+H]+	-	LysoPC(18:2)	Lipids	LPC	-	B	224940
pmp001275	Positive	672.42	7.7	671.363	C31H61O14N	[M+H]+	-	3-Hydroxypropyl palmitate glc-glucosamine	Alkaloids	Alkaloids	-	A	33159000
pmp001276	Positive	677.37	7.7	676.324	C33H56O14	[M+H]+	-	2,3-Dihydroxypropyl-9,12,15-octadecatrienoate-hexose-hexose	Lipids	Free fatty acids	-	A	2626400
pmp001278	Positive	496.34	7.81	495.296	C24H50NO7P	[M+H]+	-	LysoPC(16:1)	Lipids	LPC	-	B	1005400
pmp001281	Positive	522.36	8.12	521.311	C26H52NO7P	[M+H]+	-	LysoPC(18:1)	Lipids	LPC	-	B	157380
pmp001283	Positive	355.29	8.23	354.251	C21H38O4	[M+H]+	-	Glyceryl linoleate	Lipids	Glycerol ester	26545-74-4	A	15179
pmp001284	Positive	331.28	8.68	330.251	C19H38O4	[M+H]+	-	Glycerin Monopalmitate	Lipids	Glycerol ester	542-44-9	A	48057
pmp001285	Positive	149.02	8.71	148.012	C8H4O3	[M+H]+	-	Phthalic anhydride	Phenolic acids	Phenolic acids	85-44-9	A	651550
pmp001287	Positive	120.08	2.42	119.067	C8H9N	[M+H]+	-	N-Benzylmethylene isomethylamine	Alkaloids	Alkaloids	-	A	4270400
pmp001309	Positive	465.1	4.15	464.076	C21H20O12	[M+H]+	-	6-Hydroxykaempferol-7-O-glucoside	Flavonoids	Flavonols	-	B	258600
pmp001310	Positive	627.2	3.82	626.12	C27H30O17	[M+H]+	-	6-Hydroxykaempferol-3,6-O-Diglucoside	Flavonoids	Flavonols	-	B	96295
pmp001311	Positive	627.2	3.38	626.12	C27H30O17	[M+H]+	-	6-Hydroxykaempferol-7,6-O-Diglucoside	Flavonoids	Flavonols	-	B	14582

## Sheet: Table S2
Table S2. UPLC-MS/MS metabolomics analysis of serum samples from goats fed A. sinensis leaves
Index	Compounds	Class	CON1	CON2	CON3	CON4	CON5	CON6	ASL1	ASL2	ASL3	ASL4	ASL5	ASL6	VIP	Fold_Change	Log2FC	Type
MEDN005	L-Threonine	Amino Acid metabolomics	227760	265460	162040	184980	206910	188100	258550	183510	183910	382730	412090	269700	1.05118	1.36854	0.452638	insig
MEDN007	L-Arginine	Amino Acid metabolomics	6197200	6711300	5904700	5384300	4972300	3170400	6710700	6915300	4776100	7759900	4897200	3170200	0.130047	1.05842	0.0819074	insig
MEDN010	L-Citrulline	Amino Acid metabolomics	11203000	13983000	14996000	12406000	4707600	13980000	11099000	9662300	6000200	7594200	12705000	11771000	0.42889	0.825412	-0.276815	insig
MEDN011	L-Glutamic Acid	Amino Acid metabolomics	3208700	2390300	2594500	3594900	2329300	3039900	3387800	3151300	2336700	2121100	2133400	3056600	0.374499	0.943424	-0.084021	insig
MEDN012	L-Histidine	Amino Acid metabolomics	258210	197080	252610	214100	173200	251210	297620	173250	177920	146120	235450	282080	0.204803	0.97477	-0.0368663	insig
MEDN013	L-Isoleucine	Amino Acid metabolomics	164300	130580	133490	130820	143700	145090	243900	216020	223360	232610	193430	201910	1.99188	1.5463	0.628819	insig
MEDN018	L-Serine	Amino Acid metabolomics	158040	437380	300260	271800	124600	263430	178030	513420	545060	236450	287770	257530	0.616633	1.29749	0.375724	insig
MEDN019	L-Tryptophan	Amino Acid metabolomics	1362200	1276900	1478000	1033700	930340	1783900	2011100	618710	614780	643020	1241800	1245300	0.761251	0.810512	-0.303094	insig
MEDN022	(5-L-Glutamyl)-L-Amino Acid	Amino Acid metabolomics	12354	17812	14912	18651	5083.7	15495	17455	7969.1	12672	6720.7	16052	8419.7	0.473777	0.821853	-0.283048	insig
MEDN025	3-Hydroxy-3-Methylpentane-1,5-Dioic Acid	Amino Acid metabolomics	92034	113890	111190	91555	94265	100070	138500	174660	192090	115530	94148	190270	1.44642	1.50115	0.586066	insig
MEDN028	4-Hydroxy-L-Glutamic Acid	Amino Acid metabolomics	2362100	2255500	2782300	2191000	2170400	2039400	2182000	2901800	2478700	2474600	2281700	2044000	0.376641	1.04073	0.0575956	insig
MEDN032	Allantoin	Organic Acid And Its Derivatives	2155200	1885700	2062100	1592900	1951300	1760000	2077600	2179500	2562000	1816700	2376000	2471500	1.26572	1.182	0.241229	insig
MEDN037	Dopamine	Polyamine	51306	54349	57888	62695	63625	55769	49355	47477	51360	59915	56573	73431	0.24683	0.97824	-0.0317398	insig
MEDN038	Glutathione Oxidized	Amino Acid metabolomics	99236	99722	89351	109630	110130	100710	98675	122300	96686	121840	101720	107910	0.732262	1.06628	0.0925911	insig
MEDN039	Glutathione Reducedform	Amino Acid metabolomics	12688	17415	12364	21932	19697	9707.9	13092	8078.6	12936	10566	18378	8446.3	0.999636	0.762195	-0.391767	insig
MEDN040	Glycyl-L-Proline	Amino Acid metabolomics	6127.4	5550.8	2218.4	3911.1	489.18	1110.6	3837.6	2748.1	2203.6	553.11	2224.4	1116.6	0.394564	0.653532	-0.61367	insig
MEDN041	Hexanoyl Glycine	Amino Acid metabolomics	619830	145750	132140	87453	471630	167320	561410	1313500	1491400	2090000	2235800	2063500	1.80867	6.00669	2.58657	up
MEDN042	L-Asparagine Anhydrous	Amino Acid metabolomics	125670	108850	155250	130610	100930	166690	144660	151440	100880	109300	129810	124820	0.127347	0.965622	-0.0504698	insig
MEDN043	L-Carnosine	Amino Acid metabolomics	255790	418570	582310	444770	225130	974520	1362400	572890	338890	281980	1238700	352560	0.526303	1.42961	0.515619	insig
MEDN045	L-Cysteine	Amino Acid metabolomics	1010500	937630	988830	904220	866400	948300	883490	854630	1020600	866890	982890	893410	0.486163	0.972777	-0.039819	insig
MEDN046	L-Glutamine	Amino Acid metabolomics	1043900	1254000	1229300	1184900	933340	1142800	1418900	1288400	1096400	1071900	1207600	1278900	0.814542	1.08454	0.11708	insig
MEDN049	L-Saccharopine	Amino Acid metabolomics	38534	35880	23599	26181	28501	38818	29170	29717	36360	37380	31943	26672	0.0958038	0.998585	-0.00204293	insig
MEDN055	N-Acetyl-L-Glutamic Acid	Amino Acid metabolomics	48442	124710	93270	139850	60081	53415	110000	396900	88695	61680	31399	40923	0.00282945	1.4037	0.489232	insig
MEDN056	N-Acetyl-L-Leucine	Amino Acid metabolomics	42775	33080	33294	33196	22941	26979	52672	59501	56016	44584	51179	32814	1.55088	1.54353	0.62623	insig
MEDN057	N-Acetyl-L-Tyrosine	Amino Acid metabolomics	7479.8	8488	7223.8	8617.5	6335.1	7761	8590.1	12104	10497	4654.8	8422.5	8948.3	0.458	1.15927	0.213221	insig
MEDN058	N-Acetylneuraminic Acid	Amino Acid metabolomics	20533	9878.8	14639	15887	4160.8	24544	37294	34688	47193	17611	54219	23712	1.47305	2.39526	1.26018	up
MEDN061	N-Phenylacetylglycine	Amino Acid metabolomics	37250000	52407000	52709000	77061000	23429000	62085000	26481000	38305000	69964000	15868000	47083000	62521000	0.492872	0.853352	-0.228787	insig
MEDN062	N-Propionylglycine	Amino Acid metabolomics	2840300	2205900	2552600	3462800	873860	1215700	922380	2407700	3782900	2569900	1557900	1050100	0.198821	0.934585	-0.0976018	insig
MEDN066	Phenylacetyl-L-Glutamine	Amino Acid metabolomics	86749	192060	279070	543910	89574	248760	122970	167110	173080	27862	104820	167390	0.903569	0.529977	-0.915998	insig
MEDN068	S-(5-Adenosy)-L-Homocysteine	Amino Acid metabolomics	40409	26961	35358	27121	20626	35578	33378	22906	35267	26494	29174	28522	0.180763	0.944575	-0.0822628	insig
MEDN086	Terephthalic Acid	Benzene and substituted derivatives	8696400	8464600	9284900	9101100	8928300	8379800	9658400	11130000	8317000	8122400	9007900	8989300	0.475633	1.04484	0.0632788	insig
MEDN090	2-Methoxybenzoic Acid	Benzoic Acid And Its Derivatives	78596	21273	30853	41893	47046	34370	80765	51978	65002	52064	38642	59875	1.03799	1.37119	0.455434	insig
MEDN092	3,4-Dihydroxybenzeneacetic Acid	Benzene and substituted derivatives	38498	23686	30777	39021	36235	33894	35638	37721	39421	37919	33172	22182	0.0529022	1.0195	0.0278676	insig
MEDN096	Phthalic Acid	Benzene and substituted derivatives	37045	26024	23056	31778	27751	27865	32011	30199	28321	27705	30588	30376	0.371074	1.03274	0.046477	insig
MEDN097	P–Hydroxyphenyl Acetic Acid	Benzene and substituted derivatives	239810	378660	198820	173560	222490	180130	111670	336820	421470	153810	346570	389360	0.377715	1.26282	0.336648	insig
MEDN103	Ursodeoxycholic Acid	Bile Acids	20550	6473.6	9	14765	7472.6	6411.6	3526.6	61806	102220	9	9	13716	0.247116	3.25576	1.70299	insig
MEDN105	Taurocholic Acid	Bile Acids	383590	32812	84996	84824	431290	51088	152470	160500	53397	131520	92243	141840	0.0156114	0.68498	-0.545865	insig
MEDN106	Taurochenodesoxycholic Acid	Bile Acids	87154	83636	82373	79460	88018	91707	86395	89654	79364	88092	89651	81602	0.154401	1.0047	0.00677029	insig
MEDN109	Hyodeoxycholic Acid	Bile Acids	1200300	618490	97162	846190	252050	182810	228170	1228700	563700	41110	71954	93398	0.738527	0.6966	-0.521597	insig
MEDN113	Glycochenodeoxycholic Acid	Bile Acids	11483000	25199000	15723000	34170000	1872500	25180000	14331000	56084000	12689000	29228000	6042500	35574000	0.487719	1.35485	0.438136	insig
MEDN115	Chenodeoxycholic Acid	Bile Acids	29296000	8791200	799750	25848000	3536900	6800100	4338100	63907000	43103000	545380	526370	5330500	0.274592	1.5685	0.649385	insig
MEDN120	Dulcitol	Carbohydrate metabolomics	15504	27827	18562	24999	14128	21656	26935	9497	16886	35403	13557	25482	0.020434	1.04144	0.0585832	insig
MEDN140	2,6-Dihydroxypurine	Nucleotide metabolomics	1688000	864310	1421800	2009700	953790	1160400	1681000	1457100	1320900	1429300	1907900	3060000	0.97888	1.3406	0.422882	insig
MEDN141	2'-Deoxyuridine	Nucleotide metabolomics	63914	33728	23977	36614	73325	48424	34742	33099	51475	46749	29293	34856	0.506996	0.822246	-0.282359	insig
MEDN156	Cytidine-5-Monophosphate	Nucleotide metabolomics	7762.8	5427.7	5476	5427.7	4127.7	790.12	7029.6	4999.6	8636.7	4760.8	4151.8	6398.8	0.608143	1.24008	0.310436	insig
MEDN172	Β-Nicotinamide Mononucleotide	Nucleotide metabolomics	20726	16610	29879	26164	21661	19799	29525	28464	18605	23504	16560	23529	0.204896	1.03966	0.0561147	insig
MEDN180	Norepinephrine	Hormones	280930	298900	311220	253710	298410	276860	304100	326340	285250	332450	294270	287010	0.965878	1.0636	0.0889526	insig
MEDN196	Pyrroloquinoline Quinone	Organic Acid And Its Derivatives	8972.5	18266	19066	29044	16370	20164	19708	7840.9	8739.6	10872	17444	13266	0.993656	0.696003	-0.522836	insig
MEDN201	Succinic Acid	Amino Acid metabolomics	142300	89515	111580	59893	96695	76455	190720	119920	126020	166790	201120	236440	1.63099	1.80594	0.852747	insig
MEDN204	Pyruvic Acid	Amino Acid metabolomics	15409	21240	31924	27163	20811	20924	20018	24162	22105	19405	23706	31255	0.197241	1.02313	0.0329925	insig
MEDN206	Citramalic Acid	Amino Acid metabolomics	36346	34267	36808	54787	26990	41231	28637	45967	81297	20488	61356	56396	0.425558	1.27649	0.352186	insig
MEDN209	Tryptamine	Tryptamines And Its Derivatives	389540	368070	401660	347590	314130	430040	410760	224880	219090	241620	325220	329460	1.23953	0.777879	-0.362381	insig
MEDN211	D-Arabitol	Carbohydrate metabolomics	130150	110670	113710	103290	104340	121490	138380	134210	126130	121320	123770	116270	1.30328	1.1118	0.152893	insig
MEDN213	D-Sorbitol	Carbohydrate metabolomics	13579	47513	44831	44014	26528	39737	44037	25886	35512	50318	21280	39321	0.136659	1.0007	0.00101392	insig
MEDN214	L-Arabitol	Carbohydrate metabolomics	188820	189230	194000	178110	174370	216750	187120	192020	206310	202570	232420	200730	0.985816	1.07	0.0976113	insig
MEDN220	D-Glucose	Carbohydrate metabolomics	395310	679220	493790	456200	386370	626300	616780	360550	388940	367620	406290	426170	0.779939	0.844975	-0.243019	insig
MEDN221	D-Mannose	Carbohydrate metabolomics	761210	1119700	972990	896820	802910	1188300	1201600	905240	744840	785360	826240	798860	0.529227	0.916441	-0.125886	insig
MEDN224	D-Trehalose	Carbohydrate metabolomics	979640	897930	846860	895620	735720	780640	987850	700400	912120	760010	962500	792540	0.102365	0.995913	-0.00590767	insig
MEDN226	D-Erythronolactone	Carbohydrate metabolomics	3431900	3234400	3249500	3211600	2760000	2870400	3461800	2889100	3386800	2970000	3360700	2955700	0.169129	1.0142	0.0203376	insig
MEDN228	D-Arabinose	Carbohydrate metabolomics	145000	239700	175740	224180	176570	263850	223070	162700	154730	202500	229500	165140	0.34936	0.928655	-0.106785	insig
MEDN231	L-Fucose	Carbohydrate metabolomics	279750	141360	222090	284190	106680	290460	365930	415570	512480	462330	458700	406800	1.71255	1.97943	0.985083	insig
MEDN232	L-Rhamnose	Carbohydrate metabolomics	193910	108320	191280	212150	87724	216570	338100	315530	391380	365480	368910	352810	1.81512	2.1112	1.07806	up
MEDN233	Maltose	Carbohydrate metabolomics	1718.5	1848.9	3699.1	1387	1812.4	925.13	1392	461.87	1386.5	1848.2	1387	924.8	0.927502	0.649666	-0.622229	insig
MEDN235	N-Acetyl-D-Glucosamine	Carbohydrate metabolomics	948410	1074800	1073300	1074900	907320	947770	959050	1116800	809750	891080	977620	666560	0.915755	0.899504	-0.152799	insig
MEDN237	D-Glucoronic Acid	Carbohydrate metabolomics	67966	72222	52997	39651	25517	39804	66299	104120	71169	76926	87395	74802	1.48975	1.61227	0.689098	insig
MEDN240	L-Gulono-gamma-lactone	Carbohydrate metabolomics	35491	28053	30089	29724	38778	24024	42187	28131	28533	37086	23380	42268	0.367822	1.08286	0.114853	insig
MEDN241	Vitamin D3	CoOthersEnzyme Factor & vitamin	20313	37111	25021	30453	9	27313	8809.4	17326	25692	9	21546	36812	0.0971148	0.785868	-0.347641	insig
MEDN244	Orotic Acid	CoOthersEnzyme Factor & vitamin	56517	66239	74769	61299	73630	62836	54848	73580	71470	67391	61927	61414	0.147561	0.988211	-0.0171087	insig
MEDN245	Pantothenate	CoOthersEnzyme Factor & vitamin	1287300	1199700	828440	784680	666690	1106000	734470	1139100	1073800	663290	741040	577840	0.728816	0.839384	-0.252598	insig
MEDN263	5-Hydroxyindole-3-Acetic Acid	Indole And Its Derivatives	82319	123310	165800	105750	23135	208020	68123	103540	97154	54826	52945	53828	0.59921	0.607646	-0.718698	insig
MEDN266	Indole-3-Carboxaldehyde	Indole And Its Derivatives	29898	92004	42679	52203	29735	45722	55912	55985	63419	30545	83185	152210	0.817011	1.5099	0.594457	insig
MEDN280	2-Aminoethanesulfonic Acid	Organic Acid And Its Derivatives	5211000	2577100	3259600	6371900	6021300	2720100	6575200	5820500	2435200	3477600	4688600	1851000	0.267358	0.949815	-0.0742821	insig
MEDN283	2-Hydroxybutanoic Acid	Organic Acid And Its Derivatives	2529600	2232200	2862300	3108500	2842100	2652300	3602200	3635800	3061700	3527800	3280900	2705500	1.43647	1.22105	0.288117	insig
MEDN285	2-Methylsuccinic Acid	Organic Acid And Its Derivatives	378970	307230	591060	446180	355170	729470	494600	620010	423330	319520	559860	580710	0.389858	1.06764	0.0944308	insig
MEDN290	3-Hydroxy-3-Methyl Butyric Acid	Organic Acid And Its Derivatives	664620	593480	962530	1148500	572780	402450	981610	769260	814730	636030	505170	814360	0.242127	1.0407	0.0575493	insig
MEDN292	3-Hydroxybutyrate	Organic Acid And Its Derivatives	12409000	5207500	10535000	13947000	5899900	13276000	19611000	17996000	25589000	22972000	23592000	19878000	1.74162	2.1157	1.08113	up
MEDN293	3-Hydroxypropanoic Acid	Organic Acid And Its Derivatives	11018	17593	20010	17512	13626	10665	19652	18747	10661	13692	19956	19575	0.522886	1.13115	0.177789	insig
MEDN297	4-Hydroxy-2-Oxoglutaric Acid	Organic Acid And Its Derivatives	118560	111040	125700	128990	84327	130620	118110	125370	114920	120590	165070	127940	0.787364	1.10406	0.142819	insig
MEDN299	Adipic Acid	Organic Acid And Its Derivatives	314190	253620	386240	366720	199250	321670	229390	621060	311840	224710	402940	450970	0.528341	1.21677	0.283054	insig
MEDN300	Azelaic Acid	Organic Acid And Its Derivatives	10580000	7947600	13464000	9064300	7176300	10129000	9572400	12541000	9137200	8145200	9823500	8785700	0.0740988	0.993897	-0.00883228	insig
MEDN301	Caffeic Acid	Organic Acid And Its Derivatives	2852300	924650	1389100	1058300	1329300	888450	2143100	4915500	1873800	1608700	2783000	1919100	1.29385	1.80562	0.852492	insig
MEDN305	Creatine	Organic Acid And Its Derivatives	1348300	1625600	1507700	1268500	1583400	2646700	3087900	1097000	3357800	3141800	3132100	3684100	1.34237	1.75354	0.810272	insig
MEDN311	Dodecanedioic Aicd	Organic Acid And Its Derivatives	42944	16381	45581	18076	17523	19372	35309	67279	26278	32804	54066	25598	1.0566	1.5095	0.594069	insig
MEDN314	Glutaric Acid	Organic Acid And Its Derivatives	440210	302150	589370	384360	345880	718280	566470	616500	498660	352360	623820	549230	0.728067	1.15351	0.206028	insig
MEDN316	Guanidinoethyl Sulfonate	Organic Acid And Its Derivatives	185020	170970	158990	176860	205920	186540	143820	105410	141400	157030	170590	184020	1.20514	0.832122	-0.265133	insig
MEDN317	Hippuric Acid	Amino Acid metabolomics	27841000	9454400	14123000	10955000	13527000	8799400	21168000	48325000	18862000	16137000	26846000	18882000	1.28255	1.77356	0.826646	insig
MEDN320	Hydrocinnamic Acid	Organic Acid And Its Derivatives	173030	42986	100460	48998	35397	65379	44289	61191	20556	11295	31627	24960	1.29859	0.41591	-1.26566	down
MEDN322	Kinurenine	Organic Acid And Its Derivatives	1087900	808540	1707000	1018400	522060	797960	1152400	1001000	986130	477320	519310	646530	0.605485	0.804915	-0.313092	insig
MEDN324	L-3-Phenyllactic Acid	Organic Acid And Its Derivatives	26763	16706	29151	23362	20886	28137	97086	73629	867640	60805	49481	54252	1.47101	8.29553	3.05233	up
MEDN325	L-Lactic Acid	Organic Acid And Its Derivatives	2516300	3740400	3332200	3593200	2710300	2597900	3446200	1869200	1975600	1579600	2998600	2134300	1.22857	0.757343	-0.400981	insig
MEDN326	L-Tartaric Acid	Organic Acid And Its Derivatives	22070	31173	31382	35774	23028	18990	21684	15017	23704	22271	13255	25945	1.11575	0.750389	-0.414289	insig
MEDN327	L-Dihydroorotic Acid	Organic Acid And Its Derivatives	45107	50074	49565	47968	40389	34240	44488	35976	42528	34406	44220	56213	0.313089	0.96442	-0.0522662	insig
MEDN333	Malonicacid	Organic Acid And Its Derivatives	13161000	5357900	11288000	14276000	6111500	13677000	20335000	18770000	27362000	24394000	24457000	21063000	1.74189	2.13524	1.0944	up
MEDN334	Mandelic Acid	Organic Acid And Its Derivatives	321900	508070	249940	215280	314860	255510	152820	405230	585560	194770	452130	513980	0.3226	1.23528	0.304839	insig
MEDN335	Methylmalonic Acid	Organic Acid And Its Derivatives	1669400	1081900	1322100	854820	963250	1117100	1778400	1311700	1769100	1765600	2488900	2434600	1.63453	1.64774	0.720488	insig
MEDN338	Phenyllactate (Pla)	Organic Acid And Its Derivatives	6850.1	6182.3	13246	7686.6	11225	7384	12924	10909	15143	6010.4	12553	9943.6	0.795472	1.28358	0.360175	insig
MEDN340	Pyrrole-2-Carboxylic Acid	Organic Acid And Its Derivatives	15559	11764	8966.5	17299	9836.4	15166	17540	30666	11624	7094.1	8615.9	10077	0.0798586	1.0894	0.123535	insig
MEDN342	Sebacate	Organic Acid And Its Derivatives	6909.7	5536.9	5761.6	3079.2	3613.7	3284.7	20353	25587	16238	13295	20531	12856	1.94989	3.86223	1.94943	up
MEDN344	Subericacid	Organic Acid And Its Derivatives	250100	226690	248240	234310	242260	242200	270450	337920	323980	284490	310270	326300	1.89348	1.2837	0.360311	insig
MEDN346	Vanillic Acid	Organic Acid And Its Derivatives	107700	133750	65664	51972	77866	48831	28880	92523	118930	36895	88162	90227	0.312994	0.937902	-0.0924904	insig
MEDN348	TXB2 [9α,11,15S-trihydroxythromba-5Z,13E-dien-1-oic acid]	Oxidized lipid	214970	498000	491780	410230	92840	226600	355220	357710	1430800	107560	265450	114270	0.00871936	1.3601	0.443716	insig
MEDN351	12-Hete	Lipids	896660	276290	795190	1260300	476260	376660	599710	945520	1916800	404180	436730	255500	0.0382232	1.11689	0.15949	insig
MEDN362	Lysope 18:1	LipidsOthersPhospholipid	17295000	16168000	16051000	19108000	11858000	15444000	18462000	27994000	20550000	22157000	16609000	22412000	1.4497	1.33631	0.418252	insig
MEDN364	Lysope 18:0	LipidsOthersPhospholipid	5885200	4537600	5074000	6273700	3403700	5598200	4774400	5081000	4956400	5164100	4481100	4574100	0.238972	0.943414	-0.0840377	insig
MEDN366	Lysope 16:0	LipidsOthersPhospholipid	2906100	2235700	2397300	3336900	2006200	3236000	3210400	3054600	2344900	2999300	2793900	2726800	0.544526	1.06277	0.0878261	insig
MEDN368	Lysope 14:0	LipidsOthersPhospholipid	24318	23430	23949	39951	14020	20757	19168	22104	11631	21244	19722	20919	0.770976	0.783937	-0.35119	insig
MEDN370	Lysopa 18:0	LipidsOthersPhospholipid	211420	208040	282790	261480	260430	331090	271120	200050	150040	246000	252620	281760	0.525059	0.901199	-0.150082	insig
MEDN372	Lysopa 16:0	LipidsOthersPhospholipid	222800	225900	284670	227230	264720	301550	316500	231660	217650	258450	289390	286450	0.441228	1.04796	0.0675848	insig
MEDN374	9-Hpode	Lipids	58680	98235	95987	51783	30685	76840	47060	97269	101380	430310	210770	321510	1.31314	2.93127	1.55153	up
MEDN375	13-HOTrE [13S-hydroxy-9Z,11E,15Z-octadecatrienoic acid]	Oxidized lipid	10644	9688.7	16707	13096	9210	9655.8	11717	13692	15329	25230	21746	19849	1.44921	1.55885	0.640482	insig
MEDN376	9,10-DiHOME [(±)9,10-dihydroxy-12Z-octadecenoic acid]	Oxidized lipid	191110	325180	365580	227690	149210	309110	188270	423700	325070	1065000	515780	777500	1.28463	2.10177	1.0716	up
MEDN378	γ-Linolenic Acid(C18:3N6)	Lipids_Fatty Acids	68388	43043	48439	20703	48124	25300	78654	82513	91670	207390	99365	114500	1.72592	2.65394	1.40813	up
MEDN379	Tridecanoic Acid	Lipids_Fatty Acids	4080.1	4938.5	2774.1	3689.3	4370.6	3627.8	5156.5	4026.5	4096.2	6042.4	7315.4	4976.7	1.25526	1.34639	0.429093	insig
MEDN380	Palmitoleic Acid (C16:1)	Lipids_Fatty Acids	5487300	3118300	4149600	1711700	3560200	2317700	8752500	8493600	6150900	10813000	8958600	6790600	1.81037	2.45563	1.29609	up
MEDN381	Hexadecanoic Acid (C16:0)	Lipids_Fatty Acids	6036800	4701100	4545700	3438500	5309000	4061700	5713900	8645300	6152400	8724200	7779600	6996600	1.70446	1.56666	0.647697	insig
MEDN383	Linoleic Acid (C18:2N6C)	Lipids_Fatty Acids	5305000	4225200	4450600	3117500	4391300	3411300	5457900	6796600	7063200	12221000	8554000	7886000	1.78442	1.92679	0.946196	insig
MEDN385	Dodecanoic Acid(C12:0)	Lipids_Fatty Acids	484480	376770	441470	299140	353090	332760	598820	516230	429440	702570	709590	629660	1.72644	1.56764	0.648596	insig
MEDN388	Elaidic Acid (C18:1N9T)	Lipids_Fatty Acids	14856	12430	12234	8841.2	11111	9446.1	11216	15099	13179	11109	14086	14688	0.936648	1.15176	0.203834	insig
MEDN390	EPA [5Z,8Z,11Z,14Z,17Z-eicosapentaenoic acid]	Oxidized lipid	1569000	1270900	1256400	1201500	1689200	836720	2578700	2607400	1398100	2571800	2085300	2047100	1.60956	1.69848	0.764241	insig
MEDN391	DHA [4Z,7Z,10Z,13Z,16Z,19Z-docosahexaenoic acid]	Oxidized lipid	25347	26435	15826	17277	20803	15803	40966	35549	30494	47967	25034	39903	1.73128	1.81012	0.856083	insig
MEDN394	Cis-11,14-Eicosadienoic Acid (C20:2)	Lipids_Fatty Acids	1317.2	672.96	737.58	2666.1	1097.1	686.59	1196.1	1379.5	1259.9	2500.6	1037.9	1891.1	0.808753	1.29085	0.368319	insig
MEDN395	Cis-11,14,17-Eicosatrienoic Acid (C20:3)	Lipids_Fatty Acids	277890	289260	283810	279390	264260	278700	288210	281960	286600	277830	282000	274120	0.471996	1.0104	0.014933	insig
MEDN399	Arachidic Acid(C20:0)	Lipids_Fatty Acids	843690	167500	299650	237030	892750	181050	611210	2103600	1398300	5003600	5311400	10432000	1.68026	9.48255	3.24527	up
MEDN400	Α-Linolenic Acid(C18:3N3)	Lipids_Fatty Acids	85911	47865	56922	28304	66545	30442	101310	98598	105120	268570	133710	136250	1.71357	2.66958	1.41661	up
MEDN406	3-(3-Hydroxyphenyl)Propionate Acid	Organic Acid And Its Derivatives	22203	8170.4	18426	16443	7879.1	10232	82005	56690	870110	52339	29164	20343	1.41958	13.3246	3.73602	up
MEDN411	Neopterin	Pteridines and derivatives	145880	123630	139050	117620	130150	131000	145130	135900	144090	120620	124890	122950	0.100617	1.00794	0.0114072	insig
MEDN415	2-(Formylamino)Benzoic Acid	Benzene and substituted derivatives	35381	45641	35927	42129	20252	41530	27196	32221	122460	45478	74145	38954	0.755762	1.54149	0.624328	insig
MEDN416	Ureidoisobutyric Acid	Organic Acid And Its Derivatives	25180	11206	11450	22972	12335	13384	22359	36150	31254	16549	19324	22957	1.22975	1.53939	0.622362	insig
MEDN418	Acetaminophen Glucuronide	Carbohydrate metabolomics	10168	10303	16919	23436	13251	26158	15301	13552	10986	10326	18740	19924	0.248465	0.886207	-0.174284	insig
MEDN429	3-Hydroxyhippuric Acid	Organic Acid And Its Derivatives	56924	29241	44894	26650	46077	38179	177810	231510	1334000	135620	275610	62563	1.63133	9.16295	3.19581	up
MEDN432	5-Hydroxyhexanoic Acid	Organic Acid And Its Derivatives	125430	74661	81370	71223	42401	49635	121400	166120	113540	75741	90236	115290	1.27209	1.53428	0.617566	insig
MEDN434	Pseudouridine	Nucleotide metabolomics	1244800	752350	920700	746730	781190	973580	1057500	1407000	1355000	1141400	1403200	1315600	1.65274	1.41709	0.50293	insig
MEDN452	2'-Deoxycytidine-5'-Monophosphate	Nucleotide metabolomics	10208	10809	13299	13883	10415	7619.9	7605.7	27864	6578.5	3411.2	5538.9	6626	0.819542	0.870012	-0.200892	insig
MEDN455	Guanine	Nucleotide metabolomics	190450	67245	59114	79444	182750	246400	138450	20486	151260	83424	30231	3634.7	1.02779	0.517911	-0.949223	insig
MEDN461	D-Sedoheptuiose 7-Phosphate	Carbohydrate metabolomics	20818	12830	17091	22725	23844	17785	15960	13876	13601	16962	9991.6	13055	1.35713	0.725028	-0.463892	insig
MEDN478	Aminomalonic Acid	Organic Acid And Its Derivatives	67382	29769	47214	49530	34990	38610	69008	61639	67676	56630	114520	90507	1.55797	1.71958	0.782059	insig
MEDN480	DL-Glyceraldehyde-3-Phosphate	Organic Acid And Its Derivatives	50093	60909	81047	34630	63204	42392	98662	56487	48675	42274	72981	57735	0.45093	1.13404	0.181475	insig
MEDN487	Allysine	Organic Acid And Its Derivatives	28596	37383	52877	33842	43542	25403	39886	28216	23390	27963	25736	21523	1.13734	0.752174	-0.410863	insig
MEDN491	9-HOTrE [9S-hydroxy-10E,12Z,15Z-octadecatrienoic acid]	Oxidized lipid	10577	8440.7	11103	10524	14588	9193.9	12460	12399	12304	16981	12782	13295	1.30383	1.24515	0.316323	insig
MEDN494	8,15-Dihete	Lipids_Fatty Acids	498130	274210	386560	141990	326840	221920	809760	702660	503000	928540	725620	544100	1.73029	2.2781	1.18783	up
MEDN498	Ribulose-5-Phosphate	Carbohydrate metabolomics	5641.7	5587.5	9018	5052.1	1590.5	8198.7	5745.8	6801.1	5771.5	5566.4	3449.3	3810.9	0.0169307	0.887613	-0.171998	insig
MEDN499	Argininosuccinic acid	Organic Acid And Its Derivatives	14119	9626	3861.7	7751.5	10289	15383	8322	7727.7	13336	5591.8	11465	13085	0.0336587	0.975378	-0.035967	insig
MEDN501	Acetyl Tryptophan	Amino Acid metabolomics	10014	19803	12809	17324	18675	12263	15115	1116.6	2790.6	8363	11152	9756	1.17659	0.531348	-0.91227	insig
MEDN502	2-Deoxyribose 1-Phosphate	Carbohydrate metabolomics	205060	154620	186230	169320	110010	152090	187710	171020	226370	137960	224630	138020	0.509233	1.11089	0.151721	insig
MEDN506	N-Acetylglucosamine 1-Phosphate	Carbohydrate metabolomics	19298	14243	11149	12356	5594.1	31920	33023	10640	30766	18521	30498	34768	1.13475	1.67318	0.742592	insig
MEDN523	Indolelactic acid	Indole And Its Derivatives	28134	6947.6	12008	7586.4	8137.3	7294.6	6567.4	26503	18762	19168	21542	14127	0.979373	1.5215	0.605497	insig
MEDN530	Pimelic acid	Organic Acid And Its Derivatives	1292900	721990	959030	849910	716220	613070	1849400	2091900	2247400	904230	1332400	766290	1.25167	1.7837	0.834873	insig
MEDN533	Xanthosine	Nucleotide metabolomics	358400	264170	254110	297180	294170	381850	314650	262390	428990	256540	348640	387040	0.426812	1.08021	0.111305	insig
MEDN539	3'-Sialyllactose	Carbohydrate metabolomics	18159	7851.2	8765.4	11700	8162.9	12878	13510	16091	12780	8990.5	14430	12753	0.73878	1.16349	0.218454	insig
MEDN540	1-Methylguanine	Nucleotide metabolomics	18851	12429	17924	11211	9866	5758.6	17807	23691	37890	20741	14078	9514.9	1.00173	1.62707	0.702278	insig
MEDN541	DL-3,4-Dihydroxyphenyl glycol	Benzene and substituted derivatives	69504	63285	94868	74988	50775	68602	62153	77110	69128	57740	90004	56735	0.103421	0.978314	-0.0316306	insig
MEDN553	2-Methylbenzoic acid	Benzene and substituted derivatives	638810	400530	544420	694160	641950	448910	588310	403500	509790	387940	516710	581380	0.677067	0.886858	-0.173225	insig
MEDN554	2-(4-Hydroxyphenyl)ethanol	Benzene and substituted derivatives	365130	257700	271500	149280	196450	290980	10309000	2316300	41840000	3080900	668430	288530	1.50187	38.2114	5.25593	up
MEDN556	Cinnamoylglycine	Organic Acid And Its Derivatives	7505.6	7384.2	2478.8	7815.2	5270.6	6012.2	2775.6	6912.1	5502.4	5754.8	3113.1	3116.4	0.792455	0.745186	-0.424328	insig
MEDN560	Marmesin	Carbohydrate metabolomics	117630	54062	117900	68378	55395	60113	45169	78947	49569	67462	72482	192040	0.052105	1.06799	0.0948959	insig
MEDN568	2-Methylguanosine	Nucleotide metabolomics	149170	96475	98446	91825	85594	102380	116600	126850	229470	105040	119620	117480	1.00595	1.30642	0.385615	insig
MEDN569	DL-o-Tyrosine	Organic Acid And Its Derivatives	723810	334540	429500	451870	398080	531540	563090	531820	366030	475350	640290	542770	0.536871	1.08713	0.120527	insig
MEDN570	L-Erythrulose	Carbohydrate metabolomics	10718	6434.9	11206	10721	10087	11207	21688	10682	6134.2	24311	7570.5	6718.9	0.314732	1.27712	0.352892	insig
MEDN571	3-Methoxybenzenepropanoic acid	Carbohydrate metabolomics	11195	12845	12741	11165	8515.2	11127	14970	8297.2	6409.7	9893.5	10214	10241	0.64734	0.888105	-0.171198	insig
MEDN579	N-lactoyl-phenylalanine	Organic Acid And Its Derivatives	101180	169570	187820	173250	127660	145940	157160	94480	133070	75280	160210	121460	0.887339	0.819134	-0.287829	insig
MEDN581	Imidazoleacetic acid	Organic Acid And Its Derivatives	171790	89908	160830	83347	99085	125530	209680	303690	849310	228530	188700	212040	1.52768	2.72687	1.44725	up
MEDN587	N-Acetylvaline	Organic Acid And Its Derivatives	44014	197630	210580	196610	56337	242300	33682	192370	84191	47780	142400	342000	0.291238	0.889128	-0.169537	insig
MEDN588	Glycerol 3-phosphate	Lipids_Fatty Acids	87886	75266	316010	141510	172500	88473	96243	171100	148920	65348	283610	124240	0.0409302	1.00887	0.0127335	insig
MEDN593	D-(+)-Malic acid	Amino Acid metabolomics	5621.8	13435	14474	15660	5658.8	18111	14840	9791.7	4609.2	17121	2788	10009	0.450022	0.810834	-0.302522	insig
MEDN594	m-Coumaric acid	Benzene and substituted derivatives	38144	30563	39581	28219	34916	32554	29177	33713	35405	47651	41974	24314	0.162985	1.04048	0.0572493	insig
MEDN604	Tetradecanedioic acid	Lipids_Fatty Acids	311060	106240	192690	118460	248330	108500	371780	2045700	353370	1877000	2873800	1940100	1.76723	8.71826	3.12404	up
MEDN606	5-Methoxytryptophol	Indole And Its Derivatives	561700	518110	921770	608170	286030	497750	549610	539440	555930	259950	301010	356250	0.809603	0.755022	-0.405409	insig
MEDN611	6-β-hydroxytestosterone	Hormones	10490	70171	40150	55040	12583	76936	105280	11868	10279	62855	12407	57585	0.139732	0.980797	-0.0279741	insig
MEDN621	Indoxylsulfuric acid	Organic Acid And Its Derivatives	11741	8982.2	9105.8	10915	7013.3	5861.8	9	9	9	9	4198.1	3475.4	1.61286	0.143783	-2.79804	down
MEDN623	Salicyluric acid	Benzene and substituted derivatives	66305	43935	50514	37781	30438	36629	4893500	1135400	6819300	1300100	144990	44961	1.57234	53.984	5.75446	up
MEDN625	Formononetin	Carbohydrate metabolomics	239400	181200	195490	198430	151520	226730	190100	179610	238250	366220	466880	293220	1.16211	1.45399	0.540021	insig
MEDN632	N-Oleoyl Glycine	Organic Acid And Its Derivatives	5411.6	7033.6	3949.2	5030.8	4405	4453	11935	10277	10174	18502	18517	13603	1.94414	2.74106	1.45473	up
MEDN651	Succinic anhydride	Organic Acid And Its Derivatives	1223600	871690	1377800	1192000	1304100	2089300	752900	926840	631910	627860	797350	833140	1.64224	0.567104	-0.818315	insig
MEDN656	Indoleacetaldehyde	Indole And Its Derivatives	3361300	3219000	3416900	2808400	2647600	3625300	3645500	1962500	1897200	2035500	2864000	2829800	1.12386	0.798517	-0.324606	insig
MEDN658	Hexadecanedioic acid	Lipids_Fatty Acids	2551700	427310	848920	624250	2653200	465040	2150800	11200000	3609000	19658000	23217000	20784000	1.72588	10.6492	3.41267	up
MEDN659	Pyrophosphate	Organic Acid And Its Derivatives	67007	31197	40620	19742	17385	26098	67957	32038	45514	28288	53617	30455	0.765836	1.27627	0.351933	insig
MEDN661	Vanillylmandelic acid	Benzene and substituted derivatives	20217	38466	29642	19419	18195	22446	18121	10818	14617	24151	24588	25886	0.736566	0.796448	-0.328347	insig
MEDN662	γ-glutamyl-Leucine	Amino acid metabolomics	158460	192820	140780	179400	229260	231290	418760	364430	246850	300980	368210	390140	1.82336	1.84572	0.884181	insig
MEDN673	Isopropyl myristate	Fatty acyls	119060	105220	109070	109880	106000	108760	111670	101620	104230	112040	125800	103230	0.00127601	1.00091	0.00131495	insig
MEDN682	Octadecanamide	Fatty acyls	64982	60028	61719	64444	76800	77630	61822	51900	65013	58296	56145	55595	1.36513	0.859883	-0.217788	insig
MEDN685	Undecanedioic acid	Fatty acyls	112750	46988	88300	33354	38051	28589	37781	24807	29647	12684	20247	8811.6	1.46097	0.384958	-1.37723	down
MEDN686	Methyl propyl disulfide	Others	289080	264190	238690	274140	311170	302710	308300	377620	250740	363600	342010	299980	1.11309	1.15611	0.209285	insig
MEDN694	2-nonanol	Alcohol	712270	729300	744400	776950	793830	761200	792020	795540	766660	730290	749420	772510	0.530045	1.01959	0.0279839	insig
MEDN704	Oxaloacetic acid	Organic Acid And Its Derivatives	75988	70214	72750	66037	26547	74965	64187	36984	24345	48244	67462	55872	0.646479	0.768676	-0.379553	insig
MEDN719	2-n-Pentylfuran	Heterocyclic compound	844.19	1097	1221.8	1171.7	1003.1	653.81	922.97	986.23	1068	812.43	779.56	1050	0.363125	0.937845	-0.0925791	insig
MEDN720	N-(2-Methylbenzoyl)glycine	Amino Acid metabolomics	431670	611960	621710	899310	277380	725430	298830	444350	813830	173270	546780	722310	0.534773	0.840758	-0.250238	insig
MEDN725	Sorbic acid	Organic Acid And Its Derivatives	238040	217070	199610	218940	208950	218810	262730	227130	184230	204990	231530	237240	0.371856	1.03568	0.0505733	insig
MEDN727	Methyl hexadecanoate	Fatty acyls	400470	392290	418450	410660	404150	396960	441830	422160	410450	418270	400030	405450	1.01537	1.03104	0.0441007	insig
MEDN730	4-Ethylphenol	Phenols And Its Derivatives	105110	87287	143490	173890	147700	178480	145210	179660	127500	190150	92574	132680	0.209964	1.03806	0.0538906	insig
MEDN731	4-tert-Octylphenol	Phenols And Its Derivatives	781770	815590	770810	961500	943650	972280	1038200	880210	801310	910820	878820	944700	0.468486	1.03974	0.0562228	insig
MEDN732	Ricinoleic Acid	Fatty acyls	25389	34357	40134	39619	39666	41444	47278	49676	44931	87481	60945	67504	1.635	1.62194	0.697722	insig
MEDN733	Phenyl-β-D-Glucopyranoside	Carbohydrate metabolomics	48741	35866	31407	26919	44722	29066	44132	71778	53093	67825	65373	56867	1.68853	1.65682	0.728418	insig
MEDN734	Cis-3-Hexenylacetate	Fatty acyls	318910000	325170000	328290000	322320000	326580000	322790000	329590000	341410000	326790000	330640000	326900000	327310000	1.28046	1.01985	0.02835	insig
MEDN739	4-Hydroxybenzyl alcohol	Benzene and substituted derivatives	108220	77804	90232	87645	68790	68588	76922	77929	67013	52702	113360	74773	0.512654	0.923037	-0.11554	insig
MEDN741	Methanesulfonic acid	Others	37883	63992	58393	40685	31623	37110	91311	63573	51790	22526	29701	45108	0.10471	1.12727	0.172833	insig
MEDN743	2-Nonanone	Ketones	365890000	367620000	373220000	372330000	378420000	376470000	375900000	388080000	377800000	380350000	375810000	371670000	1.10367	1.01596	0.0228475	insig
MEDN745	Propylparaben	Benzoic Acid And Its Derivatives	9891	11531	13761	10959	7209.5	12100	17492	5944.2	6967.5	9219.7	9504.5	9782.9	0.489119	0.900068	-0.151894	insig
MEDN747	2,4-Di-tert-butylphenol	Phenols And Its Derivatives	70366	69192	66458	78001	76828	79507	83250	72937	69820	73978	75439	79376	0.538417	1.03281	0.046575	insig
MEDN748	Methylparaben	Benzoic Acid And Its Derivatives	15804	22915	29259	23498	19128	23677	130760	49552	161540	42544	14491	23662	1.13206	3.14675	1.65386	up
MEDN750	(±)12-HEPE [(±)-12-hydroxy-5Z,8Z,10E,14Z,17Z-eicosapentaenoic acid]	Oxidized lipid	135990	28710	70728	125910	69932	33011	118410	232820	215540	83862	48707	45955	0.646849	1.60526	0.682811	insig
MEDN751	(±)12-HETE [(±)12-hydroxy-5Z,8Z,10E,14Z-eicosatetraenoic acid]	Oxidized lipid	2285200	669590	2035500	3237500	1164500	950600	1515300	2326000	4804100	1000500	1109800	658930	0.0342295	1.10362	0.142245	insig
MEDN756	(±)18-HEPE [(±)-18-hydroxy-5Z,8Z,11Z,14Z,16E-eicosapentaenoic acid]	Oxidized lipid	52090	10994	24667	48672	27899	11696	41501	86528	80944	28481	14467	12099	0.39899	1.49996	0.584924	insig
MEDN760	(±)5-HETE [(±)5-hydroxy-6E,8Z,11Z,14Z-eicosatetraenoic acid]	Oxidized lipid	7013.1	5496.1	6236.5	7250.6	6026.8	6165	6478.9	7712.1	5558.4	8796.4	9246.7	9463.7	1.19582	1.23746	0.30738	insig
MEDN763	(±)9-HETE [(±)-9-hydroxy-5Z,7E,11Z,14Z-eicosatetraenoic acid]	Oxidized lipid	41556	11584	35879	58400	22176	16479	27680	41611	92841	19651	20320	12068	0.0316579	1.151	0.202887	insig
MEDN765	11,12-EET [(±)11,(12)-epoxy-5Z,8Z,14Z-eicosatrienoic acid]	Oxidized lipid	28000	30339	35986	44214	16942	21271	35928	35870	90674	24296	35573	30607	0.759887	1.43109	0.517114	insig
MEDN767	12,13-EpOME [(±)12(13)epoxy-9Z-octadecenoic acid]	Oxidized lipid	34171	44768	47737	55519	35680	66273	45185	38683	51241	105200	49123	55984	0.680932	1.21562	0.281692	insig
MEDN768	13-oxoODE [13-oxo-9Z,11E-octadecadienoic acid]	Oxidized lipid	48098	54176	57521	60734	64027	56637	51517	56996	45033	54704	61381	60939	0.348811	0.968865	-0.0456322	insig
MEDN769	14(S)-HDHA [14S-hydroxy-4Z,7Z,10Z,12E,16Z,19Z-docosahexaenoic acid]	Oxidized lipid	11509	2085.3	4204.5	17551	6315.5	3594.8	8681.4	14138	15006	9492.2	4414.7	6835.3	0.678742	1.29402	0.371863	insig
MEDN775	20-HETE [20-hydroxy-5Z,8Z,11Z,14Z-eicosatetraenoic acid]	Oxidized lipid	3090.4	844.38	1623.5	5223.2	2744.6	1541.8	2580	8467	2967.4	8267.7	7863.1	13864	1.42231	2.92073	1.54633	up
MEDN779	5-HETrE [5S-hydroxy-6E,8Z,11Z-eicosatrienoic acid]	Oxidized lipid	3295.3	1995.6	2411.6	1800.5	1591	3319.7	2189.5	5422.4	2831.3	5028.3	4394.5	4048	1.41407	1.65912	0.730415	insig
MEDN782	8,9-EET [(±)8,9-epoxy-5Z,11Z,14Z-eicosatrienoic acid]	Oxidized lipid	4166.6	794.39	1270.5	3858.2	2449.5	1517.8	1954.8	12230	4385.4	2263.1	2827.7	9	0.290411	1.68386	0.751772	insig
MEDN783	9,10-EpOME [(±)9,10-epoxy-12Z-octadecenoic acid]	Oxidized lipid	59189	64894	74066	83840	75094	88175	76953	73814	74308	117170	69801	84911	0.723023	1.11611	0.158479	insig
MEDN784	9-oxoODE [9-oxo-10E,12Z-octadecadienoic acid]	Oxidized lipid	95069	89515	97311	120130	113480	122500	120710	106800	102530	118450	104290	111380	0.503708	1.04099	0.0579631	insig
MEDN795	PGF2α [9α,11α,15S-trihydroxy-prosta-5Z,13E-dien-1-oic acid]	Oxidized lipid	9352.3	8460.8	8378.2	8870.9	3305.5	12021	7573.8	7637.4	18938	3771.7	9355.8	4732.2	0.112967	1.03215	0.0456583	insig
MEDN804	TxB3 [9α,11,15S-trihydroxythromba-5Z,13E,17Z-trien-1-oic acid]	Oxidized lipid	3480.6	8847.4	5110.7	5319.2	3666.1	3055.5	9751.6	9992.4	11793	1688.2	3925.2	3689.9	0.258476	1.38538	0.470281	insig
MEDN807	Myristic acid	Fatty acyls	1683	1040.1	2019.7	682.13	1072.1	1196.9	2621.9	1981.7	1161.6	1924.7	1319.7	1800.1	1.13102	1.40496	0.490534	insig
MEDN808	Myoinositol	Carbohydrate metabolomics	69845	74986	82325	77171	82968	68003	114520	118420	117160	83417	110530	96866	1.74583	1.40768	0.493317	insig
MEDN811	Pelargonate (9:0)	Fatty Acyls	22324	21405	21945	23070	21496	18557	18792	17504	19450	20307	18124	19277	1.55524	0.880875	-0.182992	insig
MEDN849	Cortisol 21-Acetate	Lipids	5052400	5889700	5640100	5691900	6286300	5890200	6366500	6527900	5993300	6272600	5464500	7012000	1.10796	1.09249	0.127615	insig
MEDP002	D-Homocysteine	Amino Acid metabolomics	100870	52820	58387	71577	60952	55263	70845	57745	41577	54705	81840	74082	0.211508	0.952297	-0.0705167	insig
MEDP006	Glycine	Amino Acid metabolomics	399160	445240	350060	313570	317570	445440	367800	553060	689700	1017800	664940	590320	1.57887	1.71006	0.774049	insig
MEDP007	L-Cystine	Amino Acid metabolomics	151310	104300	118140	122650	191910	166320	167620	158570	166710	247700	389080	340230	1.39186	1.71994	0.782356	insig
MEDP009	L-Tyrosine	Amino Acid metabolomics	71511000	41311000	47894000	58663000	42032000	54379000	53789000	50301000	39865000	43752000	69023000	51371000	0.099026	0.975652	-0.0355621	insig
MEDP011	L-Lysine	Amino Acid metabolomics	9077700	20980000	15864000	14549000	10297000	12903000	20081000	15281000	11760000	14887000	14278000	11793000	0.324371	1.0527	0.074092	insig
MEDP012	L-Ornithine	Amino Acid metabolomics	884680	1815100	999160	1264400	445820	626080	1097100	1429700	758420	608310	889310	797990	0.0764657	0.924707	-0.112931	insig
MEDP013	L-Alanine	Amino Acid metabolomics	4142300	4174700	4121100	3566700	3929100	4605600	5830700	4315000	6361200	5183400	5458400	5222300	1.71619	1.31914	0.399596	insig
MEDP014	L-Aspartic Acid	Amino Acid metabolomics	3828900	3566900	3870200	4040200	3456800	3902700	3081000	3363100	3950300	3430400	3761400	3781000	0.82482	0.942711	-0.0851129	insig
MEDP019	L-Leucine	Amino Acid metabolomics	256920000	257810000	224610000	251890000	223930000	246190000	306240000	278330000	278330000	278370000	292130000	284300000	1.81246	1.17542	0.233176	insig
MEDP020	L-Methionine	Amino Acid metabolomics	4039000	3258600	3112700	2438100	3180000	3490500	4426700	2775600	3249900	3617100	4238000	4306500	0.919667	1.15856	0.212332	insig
MEDP021	L-Phenylalanine	Amino Acid metabolomics	256130000	218750000	256340000	228630000	227230000	241180000	278060000	236450000	258340000	230590000	255150000	249690000	0.880823	1.05603	0.0786456	insig
MEDP022	L-Proline	Amino Acid metabolomics	32988000	41803000	32111000	32331000	26156000	32678000	36743000	36912000	31889000	31438000	38050000	31656000	0.446564	1.04353	0.0614661	insig
MEDP026	L-Valine	Amino Acid metabolomics	97698000	78563000	70664000	78532000	74281000	85374000	99290000	92108000	83152000	97139000	101320000	97408000	1.49179	1.17585	0.233699	insig
MEDP031	3-Chloro-L-Tyrosine	Amino Acid metabolomics	737240	212220	127910	127770	344160	146930	545100	510160	757210	600610	319920	412510	1.33291	1.85441	0.890962	insig
MEDP034	3-N-Methyl-L-Histidine	Amino Acid metabolomics	251360	395580	277030	273440	298840	370990	548520	401670	596910	282750	394480	240270	0.835269	1.31992	0.400446	insig
MEDP036	5-Oxoproline	Amino Acid metabolomics	883170	1584700	3249400	1877400	752960	4396000	1371600	3529300	1069800	928540	4070300	4936800	0.377973	1.24818	0.319826	insig
MEDP037	Aspartic acid-Phenylalanine	Amino Acid metabolomics	37769	17808	39406	18538	29034	26900	41858	24980	14352	25730	36470	25269	0.010649	0.995303	-0.0067929	insig
MEDP039	Betaine	Alkaloid	74784000	56761000	68975000	63902000	55478000	46888000	104670000	94756000	85551000	75111000	81531000	71021000	1.58132	1.39765	0.483	insig
MEDP047	Histamine	Polyamine	225920	195200	215100	232030	216880	246720	202980	233370	247040	164400	244580	264580	0.0563661	1.01885	0.026936	insig
MEDP051	L-Cystathionine	Amino Acid metabolomics	118880	102770	206990	77557	75907	97668	72926	55266	90277	85585	132460	168890	0.29688	0.890599	-0.167153	insig
MEDP055	L-Homocitrulline	Amino Acid metabolomics	111290	205230	513210	359100	334010	332270	620440	430630	800690	638890	447060	363980	1.32327	1.77978	0.8317	insig
MEDP056	L-Homocystine	Amino Acid metabolomics	45658	26548	23812	30459	38853	32496	29927	23067	18943	22573	24350	31153	1.17921	0.758308	-0.399145	insig
MEDP060	Methionine Sulfoxide	Amino Acid metabolomics	515570	748900	484000	522590	390000	457710	540190	392010	676840	471680	432810	494420	0.199926	0.964467	-0.0521966	insig
MEDP061	N,N-Dimethylglycine	Amino Acid metabolomics	2821000	2824400	2546600	3323000	2509900	2559000	2652600	3077300	2565200	2395400	2838300	2445600	0.479397	0.963247	-0.0540216	insig
MEDP062	N6-Acetyl-L-Lysine	Amino Acid metabolomics	669190	597790	636870	606070	473310	689860	775310	918890	825060	714000	679430	800260	1.61518	1.2831	0.359636	insig
MEDP067	N-Acetylmannosamine	Amino Acid metabolomics	58255	39368	74129	62366	55051	48344	77562	47779	58949	61843	82552	104700	0.996275	1.28405	0.360706	insig
MEDP069	N-Acetylputrescine	Organic Acid And Its Derivatives	162110	168730	154840	172330	153500	148090	173020	182220	174220	184480	172250	173670	1.58813	1.10448	0.143369	insig
MEDP072	N-Isovaleroylglycine	Amino Acid metabolomics	303390	299510	427120	267100	135270	208460	184420	220370	319030	224350	332030	324730	0.0711898	0.978109	-0.031933	insig
MEDP075	Nα-Acetyl-L-Arginine	Amino Acid metabolomics	412120	470360	442610	493790	400430	533530	440590	459140	473420	478430	465390	514530	0.480401	1.02857	0.0406458	insig
MEDP078	Phenylalanine-Phenylalanine	Amino Acid metabolomics	89381	91846	84581	71236	101270	72008	89810	76228	85033	83317	86510	75757	0.267867	0.973219	-0.0391638	insig
MEDP081	Serotonin	Indole And Its Derivatives	80732000	86410000	55558000	90147000	34792000	42631000	76610000	61604000	78465000	55120000	60687000	50057000	0.0653927	0.980201	-0.0288506	insig
MEDP082	S-Sulfo-L-Cysteine	Amino Acid metabolomics	999080	1378000	1006900	932570	1054200	1227200	1089100	1476000	1362700	2257600	1823300	1484200	1.47748	1.43877	0.524831	insig
MEDP083	Trans-4-Hydroxy-L-Proline	Amino Acid metabolomics	256390000	259610000	225350000	252590000	225470000	243570000	310350000	279770000	278660000	280050000	292680000	284440000	1.81545	1.17975	0.238481	insig
MEDP084	Trimethylamine N-Oxide	Amino Acid metabolomics	549250	570650	552840	696910	359180	874820	173540	267060	272600	349840	423050	693010	1.24664	0.604692	-0.725726	insig
MEDP085	Tyramine	Benzene and substituted derivatives	6823	36851	13993	10219	70045	5394.5	11421	9052.9	20074	7604	36184	8758.9	0.321644	0.649534	-0.622523	insig
MEDP086	Urea	Amino Acid metabolomics	70980000	67006000	74544000	75704000	37927000	71764000	57043000	60516000	64480000	50369000	79686000	84804000	0.0698732	0.997419	-0.00372825	insig
MEDP087	L-Alanyl-L-Lysine	Amino Acid metabolomics	82405	67599	69766	61021	53050	63151	50415	46744	83582	49987	37743	43678	1.17922	0.786285	-0.346875	insig
MEDP089	N-Acetylhistamine	Organic Acid And Its Derivatives	231180	124490	189330	302320	208320	181270	194300	144900	165630	175970	223540	309930	0.0591323	0.981696	-0.0266513	insig
MEDP101	P-Coumaric Acid	Benzene and substituted derivatives	2818800	1659000	1961300	2417000	1691100	2364700	2110500	1961000	1532100	1860800	2937500	2197200	0.09864	0.975774	-0.0353806	insig
MEDP106	Benzoic Acid	Benzene and substituted derivatives	1306600	214460	94152	513930	386110	178980	378510	497750	192410	179430	458370	133540	0.274021	0.682944	-0.55016	insig
MEDP107	Methyl Benzoate	Benzene and substituted derivatives	286750	165230	281710	226680	114840	238720	212750	160770	208300	110460	277150	286220	0.124327	0.955645	-0.065454	insig
MEDP112	4-Ethylbenzoic Acid	Benzene and substituted derivatives	82091	82245	85649	92763	81946	79316	71857	82918	75725	55408	74963	61623	1.48004	0.838265	-0.254522	insig
MEDP115	1,4-Dihydro-1-Methyl-4-Oxo-3-Pyridinecarboxamide	Pyridine And Pyridine Derivatives	181760	239080	81542	160280	182250	160010	156860	186320	236870	137180	148260	112810	0.10535	0.973508	-0.0387347	insig
MEDP118	4-Pyridoxic Acid	Pyridine And Pyridine Derivatives	165170	203630	241800	214030	117090	161460	507860	441320	544510	265320	380440	370960	1.81244	2.27561	1.18625	up
MEDP123	Acetylcholine Chloride	Cholines	68872	109460	83333	95822	84710	141020	105070	103910	79861	79889	105380	71401	0.277501	0.935348	-0.0964245	insig
MEDP125	Choline	Cholines	354780	246680	341340	373070	331170	364770	355750	287740	319050	253090	371010	289400	0.547355	0.932514	-0.100803	insig
MEDP128	Diethanolamine	Polyamine	53386	132410	85346	104890	42107	107730	65046	158730	104270	95471	69042	127530	0.56342	1.17917	0.237772	insig
MEDP130	4-Nitrophenol	Phenols And Its Derivatives	10872000	11492000	12697000	11866000	13098000	12629000	13311000	13439000	12914000	12123000	12432000	12315000	0.918402	1.0534	0.0750586	insig
MEDP133	Enterodiol	Phenols And Its Derivatives	279300	83112	254980	336760	122200	99152	128880	222230	471440	85518	91448	59251	0.43758	0.900692	-0.150894	insig
MEDP134	Inositol	Carbohydrate metabolomics	6604500	6395300	5983500	5596400	6072500	5808300	5589800	5825300	5992700	6082300	5639200	5452400	1.00473	0.94847	-0.0763256	insig
MEDP147	1-Methylhistidine	Amino Acid metabolomics	2778100	8564000	5195000	7791500	6655800	3319300	11048000	6615700	11216000	13785000	4182400	2633300	0.527504	1.44242	0.528493	insig
MEDP149	2'-Deoxyadenosine-5'-Monophosphate	Nucleotide metabolomics	3610.9	6563.9	7371	11127	5072	17512	5495.5	3104.9	12843	13601	14435	20062	0.522001	1.35673	0.440129	insig
MEDP150	2'-Deoxyinosine	Nucleotide metabolomics	48032	89150	61760	227100	83047	142050	71037	83325	576500	77944	90427	171180	0.428386	1.64391	0.71713	insig
MEDP151	2-Hydroxy-6-Aminopurine	Nucleotide metabolomics	482000	488940	277120	443610	577400	623750	585300	298570	462070	370300	358880	179120	0.8925	0.779253	-0.359835	insig
MEDP155	5-Methylcytosine	Nucleotide metabolomics	83696	82584	74036	76087	48909	65847	89778	119180	123170	86020	104930	108720	1.62565	1.46535	0.551243	insig
MEDP156	5-Methyluridine	Nucleotide metabolomics	63294	42607	50107	53521	84995	68879	55491	62481	83328	52936	53144	56847	0.0389638	1.00227	0.00326754	insig
MEDP159	Adenine	Nucleotide metabolomics	865230	561550	772850	793170	575010	792130	710790	678140	573850	651450	1019800	706310	0.00387881	0.995505	-0.00650022	insig
MEDP161	Adenosine 5'-Diphosphate	Nucleotide metabolomics	17809	9685.1	5629.6	7252.6	12756	13176	11548	13067	15363	14646	13714	9247.2	0.713164	1.17007	0.226592	insig
MEDP163	Cytidine	Nucleotide metabolomics	704850	581760	628570	980480	914720	875660	691690	658010	791760	487660	680000	690890	0.899409	0.853601	-0.228366	insig
MEDP165	Cytosine	Nucleotide metabolomics	559520	451900	378410	390030	307980	621890	394630	511360	534540	469310	609250	646250	0.876684	1.16814	0.224211	insig
MEDP166	Deoxyguanosine	Nucleotide metabolomics	326050	800550	371110	411490	427280	543050	472050	339840	557880	537540	1011000	781910	0.732239	1.28501	0.361778	insig
MEDP167	Guanosine	Nucleotide metabolomics	12754000	16869000	8494100	18198000	12721000	13589000	18169000	13401000	18240000	10623000	13711000	8453000	0.124718	0.99966	-0.00049073	insig
MEDP170	Hypoxanthine	Nucleotide metabolomics	16022000	11772000	16291000	22363000	17804000	13760000	15351000	10045000	14052000	10753000	14568000	16126000	0.976781	0.825358	-0.276908	insig
MEDP171	Inosine	Nucleotide metabolomics	120560000	175730000	123610000	162410000	136560000	109690000	135990000	107960000	136170000	83713000	133960000	111900000	0.970719	0.856538	-0.223411	insig
MEDP176	Thymidine	Nucleotide metabolomics	416720	250990	158800	241270	356900	308660	259150	231160	496970	422010	503840	460510	0.947513	1.3694	0.453546	insig
MEDP178	Uracil	Nucleotide metabolomics	455200	373470	393060	596100	431310	424600	362200	307010	464260	352940	441940	499190	0.654324	0.907919	-0.139364	insig
MEDP179	Uridine	Nucleotide metabolomics	1374200	858660	1019300	1849400	1361200	1370400	1237200	1097000	1428600	1022000	1164900	1440400	0.237599	0.943438	-0.0840005	insig
MEDP184	3,3',5-Triiodo-L-Thyronine	Hormones	46902	24514	39060	31129	49246	45865	29700	16647	15970	31866	82264	33825	0.56377	0.888288	-0.1709	insig
MEDP185	Epinephrine	Hormones	120550	217680	201750	230960	131590	177460	417410	361520	519650	310550	333420	365950	1.83658	2.13752	1.09594	up
MEDP186	L-Thyroxine	Hormones	775270	855480	1347300	836660	625950	1335000	696350	1197200	862800	972760	1122600	788290	0.064195	0.976512	-0.0342907	insig
MEDP205	L-Carnitine	Camitine	2404100	4755100	2351600	2553800	2550300	4128900	3014300	3193700	2995900	2764200	2188900	1813200	0.574189	0.852026	-0.231031	insig
MEDP215	Quinine	Alkaloid	46302	65664	62025	85402	27631	67705	30959	39091	73078	13211	44397	61806	0.809313	0.74012	-0.434169	insig
MEDP218	D-Mannitol	Carbohydrate metabolomics	259570	231340	256390	243720	281980	278090	239890	264890	288730	281900	281460	263500	0.691466	1.04467	0.0630409	insig
MEDP221	Ribitol	Carbohydrate metabolomics	1123900	1086000	914560	1100900	1004400	1166700	1097300	1110100	1147700	972130	1203400	1145600	0.576114	1.04374	0.06176	insig
MEDP224	D-Fructose	Carbohydrate metabolomics	55859000	62630000	54983000	56644000	58659000	57261000	57419000	55620000	57315000	58808000	51015000	56646000	0.62891	0.973376	-0.0389315	insig
MEDP229	Lactose	Carbohydrate metabolomics	55316	79363	81630	68804	84874	79302	89227	63412	45276	62550	89772	56081	0.604447	0.904358	-0.145034	insig
MEDP233	Raffinose	Carbohydrate metabolomics	7476.7	4593.1	6659.6	4593.2	8376.4	2908.7	5842.8	1679.6	6261	7062.5	14194	3321.4	0.0979217	1.10846	0.148559	insig
MEDP234	D-Glucono-1,5-Lactone	Carbohydrate metabolomics	562680	528110	560520	571000	549480	567900	538740	611390	536640	549700	571020	588180	0.452037	1.01676	0.0239821	insig
MEDP239	L-Ascorbate	CoOthersEnzyme Factor & vitamin	1432200	1787000	1662300	1345100	1629400	1294600	1193900	1085700	1247800	1225500	1210500	1180300	1.71744	0.780681	-0.357195	insig
MEDP242	Nicotinamide	CoOthersEnzyme Factor & vitamin	12098000	7671800	8128300	10015000	8466100	11779000	13711000	11172000	11386000	13907000	13757000	13053000	1.56338	1.32373	0.404613	insig
MEDP246	Nicotinic Acid	CoOthersEnzyme Factor & vitamin	361930	268640	250130	323320	258450	344610	291460	305460	270690	273570	369110	271290	0.0691743	0.985889	-0.0205031	insig
MEDP249	Pantothenol	CoOthersEnzyme Factor & vitamin	11902	8988.3	5119.2	5844.4	4586.4	10128	10004	5941.5	2599.8	37519	27735	43040	0.890689	2.72373	1.44558	insig
MEDP250	Riboflavin	CoOthersEnzyme Factor & vitamin	748130	423260	708410	403870	416600	490200	620110	611280	794530	496690	498010	509560	0.582903	1.10648	0.145973	insig
MEDP251	Trigonelline	CoOthersEnzyme Factor & vitamin	73814	100580	162970	112830	151510	164170	142820	69425	77997	174150	232630	303000	0.47032	1.30573	0.384853	insig
MEDP270	3-Indolebutyric Acid	Indole And Its Derivatives	38840	59220	91272	26471	25173	39452	31607	36441	9	9	58177	61353	0.919491	0.668963	-0.580001	insig
MEDP271	3-Indolepropionic Acid	Indole And Its Derivatives	1043300	568240	887280	562430	256060	535810	1678600	1202600	2508400	366060	492950	223120	0.367996	1.67961	0.748124	insig
MEDP274	Indole-2-Carboxylic Acid	Indole And Its Derivatives	30859	53602	27000	58308	24103	58867	36938	98786	137010	35725	38931	51579	0.775739	1.57858	0.658628	insig
MEDP275	Indole-3-Acetic Acid	Indole And Its Derivatives	6683600	6342200	6836500	5502000	5014400	7360900	7123900	3494800	3323900	3261900	5058200	5006200	1.29644	0.722554	-0.468823	insig
MEDP277	Methyl Indole-3-Acetate	Indole And Its Derivatives	42356	66154	9	109100	99727	211190	22968	43378	34625	26013	36465	65675	0.221194	0.433507	-1.20587	insig
MEDP285	2,6-Diaminooimelic Acid	Organic Acid And Its Derivatives	34440	38515	36624	39270	32791	34796	64154	55961	92987	52255	48437	42679	1.62941	1.64701	0.719852	insig
MEDP289	3,4,5-Trimethoxycinnamic Acid	Organic Acid And Its Derivatives	18128	188120	67729	74941	38379	42741	196900	45882	89846	38410	112680	27275	0.246898	1.18825	0.248839	insig
MEDP294	3-Methylcrotonyl Glycine	Organic Acid And Its Derivatives	623750	724920	1157600	789170	344520	384100	331860	789250	1444600	1071000	1755300	1711000	0.975775	1.76514	0.819779	insig
MEDP295	4-Acetamidobutyric Acid	Organic Acid And Its Derivatives	1816300	1010100	1182100	1171500	808150	1008500	1082900	2512100	2470500	1263300	1346800	1623300	1.12035	1.47198	0.557754	insig
MEDP296	4-Guanidinobutyric Acid	Organic Acid And Its Derivatives	967180	1508600	1064400	1307700	879840	1367200	880950	858090	897990	936810	1519300	993430	0.770889	0.857877	-0.221157	insig
MEDP297	5-Aminovaleric Acid	Organic Acid And Its Derivatives	67039	123480	133770	214750	63334	175130	75929	239220	51237	39612	148710	173230	0.310967	0.936251	-0.0950327	insig
MEDP298	6-Aminocaproic Acid	Organic Acid And Its Derivatives	27429000	28867000	22828000	28851000	20755000	24953000	37034000	30670000	27276000	30588000	32093000	30161000	1.44809	1.22214	0.289408	insig
MEDP299	7-Methyluric Acid	Organic Acid And Its Derivatives	3296400	2955600	3086900	2994500	3218100	2822800	2548400	3073100	3599100	3129600	3814600	2989100	0.322484	1.04243	0.0599489	insig
MEDP305	Creatinine	Organic Acid And Its Derivatives	996820	836130	937150	614230	880240	730770	1100300	1097300	1065600	960120	980440	851020	1.27651	1.21209	0.277492	insig
MEDP307	DL-2-Aminooctanoic Acid	Organic Acid And Its Derivatives	471680	549580	370010	390720	226290	720290	498700	605440	535100	667900	317970	507420	0.658228	1.14805	0.199183	insig
MEDP310	D-Pipecolinic Acid	Organic Acid And Its Derivatives	180990	403580	212200	285540	287300	367250	363050	341080	200290	314650	288890	316890	0.320959	1.05066	0.0712964	insig
MEDP313	Guanidineacetic Acid	Organic Acid And Its Derivatives	52489	145150	153130	235580	42697	180430	53411	218360	49437	46860	138130	204850	0.250985	0.878405	-0.187041	insig
MEDP322	L-Homoserine	Organic Acid And Its Derivatives	714900	790570	489550	543070	636920	612540	798680	607400	444680	916470	1001100	763470	0.742692	1.1965	0.258819	insig
MEDP325	Maleic Acid	Organic Acid And Its Derivatives	1511600	2022600	1607100	1595000	1334300	1732500	1780400	1929000	1675900	1516800	1942600	1594000	0.601904	1.06484	0.0906321	insig
MEDP326	N'-Formylkynurenine	Organic Acid And Its Derivatives	1025100	909240	995930	802340	713480	1046100	1017900	479990	422520	433720	723430	702140	1.33346	0.688195	-0.53911	insig
MEDP332	Cinnamic Acid	Organic Acid And Its Derivatives	2890600	1993600	2916300	2222500	2201900	2548600	3604200	2372900	2907700	2391000	2894600	2725400	0.927714	1.14366	0.193653	insig
MEDP336	Lysopc 14:0	LipidsOthersPhospholipid	11018000	10933000	17014000	12408000	9854500	13207000	15866000	11180000	9189700	10980000	13554000	12413000	0.0402069	0.983183	-0.0244688	insig
MEDP338	Lysopc 16:0	LipidsOthersPhospholipid	216600000	223640000	242610000	217630000	230530000	239960000	245590000	219400000	202450000	233290000	242940000	244400000	0.270726	1.01247	0.0178833	insig
MEDP340	Lysopc 16:1	LipidsOthersPhospholipid	46426000	55936000	70495000	51489000	35545000	53314000	79016000	54144000	49067000	53843000	56625000	65545000	0.818882	1.14379	0.193819	insig
MEDP342	Lysopc 18:0	LipidsOthersPhospholipid	425440000	424940000	455440000	432300000	418430000	457560000	416590000	381250000	315830000	403540000	395010000	411040000	1.3128	0.888738	-0.170169	insig
MEDP344	Lysopc 18:1	LipidsOthersPhospholipid	365720000	385680000	392020000	360130000	335760000	395800000	371910000	366140000	350110000	371420000	364180000	391330000	0.0708734	0.991043	-0.0129805	insig
MEDP346	Lysopc 18:2	LipidsOthersPhospholipid	131200000	143810000	178710000	144350000	124710000	182340000	151210000	152900000	104920000	164990000	152880000	144470000	0.171489	0.962712	-0.0548236	insig
MEDP350	Lysopc 20:1	LipidsOthersPhospholipid	7116600	7611100	7182300	8541600	6383200	11141000	9705200	7142100	6278900	8146000	7998500	8479300	0.0921511	0.995293	-0.00680613	insig
MEDP352	Lysopc 20:2	LipidsOthersPhospholipid	5506500	7729500	8665000	6819100	4894700	9534200	8876400	7759000	6361200	9956400	8384200	8359400	0.897135	1.15174	0.20382	insig
MEDP357	Urocanic Acid	Organic Acid And Its Derivatives	110610	128280	145060	104080	138410	134330	180110	151200	134880	130670	125970	127800	0.870989	1.11812	0.161071	insig
MEDP368	Taurocholic Acid Sodium Salt Hydrate	Organic Acid And Its Derivatives	4400900	3970500	4041300	4039500	3892900	4481200	3811200	3706700	3452300	3682000	3399500	3611800	1.69094	0.872603	-0.196603	insig
MEDP372	Uridine 5-Monophosphate	Nucleotide metabolomics	60264	81673	55910	68607	53824	72518	60417	52363	51462	44968	72564	45274	1.10053	0.832615	-0.264278	insig
MEDP373	N-Acetylglycine	Amino Acid metabolomics	34987000	27911000	37080000	36459000	36680000	22837000	74161000	60925000	43355000	34449000	43897000	36914000	1.29068	1.49883	0.583833	insig
MEDP380	2-(Dimethylamino)Guanosine	Nucleotide metabolomics	1037700	660540	694110	620010	531160	934660	776980	1017900	1615200	769010	1075800	1075900	1.23536	1.4137	0.499473	insig
MEDP381	7-Methylguanine	Nucleotide metabolomics	74211000	52547000	73221000	57750000	58387000	64014000	91563000	62004000	76748000	61022000	75255000	67189000	0.933728	1.14114	0.190474	insig
MEDP386	N-Acetylthreonine	Amino Acid metabolomics	86904	73045	74377	72550	81572	72510	80937	109050	160600	123720	104310	81937	1.43612	1.433	0.519041	insig
MEDP387	H-Homoarg-Oh	Amino Acid metabolomics	133120	147110	131600	140540	74470	172680	131880	75444	106720	108310	102700	180010	0.43769	0.881859	-0.18138	insig
MEDP389	Pantetheine	CoOthersEnzyme Factor & vitamin	34360000	35672000	31741000	33116000	34230000	32971000	29855000	29206000	26821000	26786000	29546000	29152000	1.90885	0.847969	-0.237917	insig
MEDP390	Hypoxanthine-9-β-D-Arabinofuranoside	Nucleotide metabolomics	120060000	168990000	113880000	168090000	136730000	109750000	132510000	106060000	141040000	82701000	130820000	109720000	0.930427	0.859757	-0.218	insig
MEDP395	L-Pipecolic Acid	Amino Acid metabolomics	316090	843630	518500	874770	390700	337460	590930	1881400	613000	394090	186090	217420	0.165872	1.18341	0.242944	insig
MEDP401	5'-Deoxy-5'-(Methylthio) Adenosine	Nucleotide metabolomics	1501900	1233000	1537800	1110200	967150	1456200	1454400	1736000	1943400	1205900	1486600	1740100	1.15372	1.22548	0.293346	insig
MEDP403	2'-Deoxycytidine	Nucleotide metabolomics	980570	838870	761960	497090	527970	951090	625640	777520	672620	750770	914600	997700	0.376429	1.03978	0.0562785	insig
MEDP404	Sarcosine	Amino Acid metabolomics	1555400	1584700	1673800	1669900	1536000	1549600	1297500	1484300	1458800	1595500	1448100	1362200	1.46792	0.903547	-0.146329	insig
MEDP405	3-Aminoisobutanoic Acid	Amino Acid metabolomics	65074	71206	101400	107460	91037	101330	94953	75546	87601	55565	96517	80559	0.531501	0.912995	-0.131322	insig
MEDP410	Trans-Citridic Acid	Organic Acid And Its Derivatives	154050	165390	156660	141900	150990	151040	165650	142160	163830	174130	157700	165440	0.930814	1.05313	0.0746818	insig
MEDP423	Phosphoric Acid	Organic Acid And Its Derivatives	1199500	1114300	860290	1213500	1050000	1262000	958430	1021500	1326800	1041000	1036800	844190	0.614925	0.929717	-0.105137	insig
MEDP513	Hexadecanamide	Lipids_Fatty Acids	8090100	68761000	29377000	34618000	9011700	57746000	86724000	9568800	9250400	35235000	9284000	71538000	0.0372888	1.06742	0.0941263	insig
MEDP429	Punicic Acid	Lipids_Fatty Acids	1801600	1819300	1885600	2081100	1908300	1923100	1694500	1818000	1904200	2104900	1715500	1899300	0.424643	0.975252	-0.0361534	insig
MEDP430	2-Aminoadipic Acid	Organic Acid And Its Derivatives	421860	577010	532710	671080	441750	697930	617380	750230	1128700	777830	613770	642740	1.2492	1.35553	0.43886	insig
MEDP431	Hordenine	Benzene and substituted derivatives	176930	142130	195320	147690	155580	168480	273020	162740	192870	163450	208730	178320	1.05532	1.19571	0.257873	insig
MEDP434	Lysopc 17:0	LipidsOthersPhospholipid	21598000	18609000	27827000	23282000	21633000	27371000	26076000	17588000	14954000	26522000	23705000	28095000	0.125447	0.975912	-0.0351767	insig
MEDP435	6-Methylmercaptopurine	Nucleotide metabolomics	146690000	141590000	143270000	144210000	141840000	142570000	144530000	142410000	143940000	140760000	143470000	141250000	0.452631	0.995571	-0.00640441	insig
MEDP437	Ergothioneine	Organic Acid And Its Derivatives	70230	64644	71053	77204	44843	56698	61523	55253	48130	52570	69648	52790	0.737577	0.883646	-0.178459	insig
MEDP438	N-Formylmethionine	Amino Acid metabolomics	2458800	2887200	1672800	2619500	1106200	1546800	2975800	1906200	2428300	1548600	1856500	1545800	0.0405985	0.997551	-0.00353733	insig
MEDP440	Methoxyindoleacetic Acid	Indole And Its Derivatives	555990	564660	655380	459750	425560	840750	854680	285940	293150	268760	585560	595000	0.709982	0.823248	-0.2806	insig
MEDP442	Sn-Glycero-3-Phosphocholine	Cholines	480870	504400	525580	629990	603050	729640	731250	479280	444070	544850	629460	609320	0.0654912	0.989837	-0.0147365	insig
MEDP450	P-Aminobenzoate	Benzene and substituted derivatives	5677100	4246500	5919200	7536000	6155200	5351200	5953600	3838900	5201400	3857200	5171500	5862700	0.894593	0.856676	-0.223179	insig
MEDP453	Indole	Indole And Its Derivatives	2078100	2131100	2116200	2095200	2049400	2243200	2182000	2094800	2025700	2094700	2135200	1982200	0.494474	0.984378	-0.022715	insig
MEDP454	Isoquinoline	Benzene and substituted derivatives	55124	159300	82208	99788	59843	93334	94903	130860	132200	57485	161580	263820	0.875299	1.52994	0.613471	insig
MEDP456	Piperidine	Benzene and substituted derivatives	4162200	4793500	3431200	4450800	3166300	4002400	6125900	4817500	4412400	4847600	5018600	4942200	1.45374	1.25651	0.329418	insig
MEDP457	5-Aminolevulinate	Organic Acid And Its Derivatives	596700	648740	452000	618130	412280	577030	831950	645320	604850	689050	672580	636570	1.31855	1.23463	0.304084	insig
MEDP494	Lysopc 15:0	LipidsOthersPhospholipid	23167000	25371000	34537000	33694000	18825000	31671000	36324000	23340000	23821000	28297000	25909000	26701000	0.0238844	0.982824	-0.0249955	insig
MEDP495	Lysope 18:2 (2N Isomer)	Lipids_Fatty Acids	104830	126480	151130	108010	120620	133340	173680	138310	107000	155200	182460	188630	1.26933	1.26984	0.344644	insig
MEDP498	Lysopc 18:3	LipidsOthersPhospholipid	96170000	103040000	112790000	100100000	105920000	109580000	110880000	98467000	85846000	105570000	111860000	115250000	0.029767	1.00043	0.000627422	insig
MEDP507	2-Hydroxycinnamic acid	Benzene and substituted derivatives	17396000	9993300	12853000	14983000	9771800	14702000	13107000	12050000	9030600	10517000	18383000	12756000	0.217763	0.951624	-0.071536	insig
MEDP509	trans-3-Indoleacrylic acid	Organic Acid And Its Derivatives	1970700	1988600	2322700	1672400	1485400	2876600	3152600	1025000	1023500	1018100	1911000	2005400	0.730799	0.822935	-0.281149	insig
MEDP510	Acetyl-L-carnitine	Camitine	46156000	67881000	47676000	61578000	51770000	82682000	68865000	67497000	103300000	80286000	73615000	51408000	0.969848	1.24383	0.314788	insig
MEDP511	Jasmonic acid	Lipids_Fatty Acids	268700	209500	326310	303510	163540	273250	165730	253230	255050	272440	274410	371010	0.198218	1.03046	0.0432931	insig
MEDP428	Cholesterol	Lipids	25997000	26549000	37924000	29620000	27146000	37960000	19245000	14028000	15535000	8600800	8016600	6267800	1.82341	0.387121	-1.36914	down
MEDP514	Thiamine	CoOthersEnzyme Factor & vitamin	213080	202930	222410	260400	86137	286230	150560	179010	127700	123110	259870	251480	0.344996	0.858827	-0.21956	insig
MEDP518	DL-Stachydrine	Organic Acid And Its Derivatives	242660	159980	374720	247300	184040	393600	239310	236090	168590	253950	452730	362590	0.310347	1.06925	0.0965998	insig
MEDP519	L-Norleucine	Amino Acid metabolomics	5606900	5464000	6225700	5223100	4390200	6467000	5768100	3393500	3383100	3192800	4880000	5344500	1.18274	0.777843	-0.362448	insig
MEDP523	DL-Carnitine	Camitine	5409000	12358000	6511600	6866200	7362700	10853000	8914500	8773600	9182800	7857700	6386400	5143100	0.190667	0.937148	-0.093651	insig
MEDP525	N-Acetyl-L-alanine	Organic Acid And Its Derivatives	8403000	12584000	10068000	9817200	11124000	20241000	19793000	6701100	16397000	19146000	21500000	22297000	0.998102	1.46509	0.550991	insig
MEDP529	Indole-3-acetamide	Indole And Its Derivatives	495430	371850	451240	488100	291150	328450	322510	594860	819850	303570	375130	346520	0.225186	1.13858	0.187233	insig
MEDP530	15-Deoxy-δ-12,14-PGJ2	Lipids_Fatty Acids	166490	171490	178060	190240	198570	206300	203280	243940	293950	277810	253730	312580	1.78409	1.42671	0.512693	insig
MEDP535	Triethyl phosphate	Organic Acid And Its Derivatives	258760	231170	210500	286600	240150	272830	250590	258280	333470	322580	268880	248240	0.940115	1.12135	0.16524	insig
MEDP537	PAF C-16	Lipids	419790000	424070000	446880000	432310000	413830000	446580000	413010000	378580000	320520000	398300000	392920000	406940000	1.35643	0.894254	-0.161243	insig
MEDP541	δ-Valerolactam	Pyridine And Pyridine Derivatives	485350	1681600	1811700	1819800	555820	2730700	507480	1813700	1076600	504040	1438300	3075700	0.13877	0.926345	-0.110378	insig
MEDP545	2-Pyrrolidinone	Benzene and substituted derivatives	4692000	5300900	4078300	4929800	3572800	4682500	6376000	5524600	5183000	5561600	5986100	5993800	1.62862	1.27035	0.345229	insig
MEDP574	Oleamide	Lipids_Fatty Acids	32201000	27388000	56543000	37847000	34373000	45929000	30782000	19503000	19604000	14694000	16469000	12931000	1.72705	0.486523	-1.03942	down
MEDP575	5-amino-1-[3,4-dihydroxy-5-(hydroxymethyl)oxolan-2-yl]imidazole-4-carboxamide	Nucleotide metabolomics	27674	9	33726	42892	144970	21825	13465	13360	15126	23064	12589	17508	0.199904	0.350843	-1.5111	insig
MEDP577	Isobutyryl carnitine	Camitine	4842300	5411200	5285000	5305300	3818700	6699400	5267900	7060100	7960400	6567900	5220900	5602200	1.07695	1.20144	0.264763	insig
MEDP583	Aspartame	Organic Acid And Its Derivatives	939720	718610	968440	783750	1050800	1158900	1750800	1338800	1087600	1076200	1422300	1458200	1.5873	1.44726	0.533321	insig
MEDP584	Pterine	Pteridines and derivatives	154150	73534	102060	111990	75616	107780	152120	151700	174350	95893	177370	119220	1.22376	1.39276	0.477942	insig
MEDP585	Stearidonic Acid	Lipids_Fatty Acids	230530	51487	75790	50529	234070	44760	138820	529110	400330	1296800	1382600	2673600	1.66126	9.34455	3.22413	up
MEDP586	N-Acetylphenylalanine	Organic Acid And Its Derivatives	97233	76804	87203	73248	62130	72159	94358	104420	102060	81743	92023	78983	1.19152	1.18092	0.239908	insig
MEDP587	N-Alpha-acetyllysine	Organic Acid And Its Derivatives	569560	579960	612650	690460	524770	633490	704590	822210	861950	676420	670420	855580	1.62392	1.27148	0.346507	insig
MEDP590	p-Mentha-1,3,8-triene	Lipids_Fatty Acids	4206700	20030000	16323000	18527000	4969200	21510000	27686000	4152400	3895700	21761000	3304400	18116000	0.272434	0.922277	-0.116727	insig
MEDP592	3-keto-Sphinganine	Organic Acid And Its Derivatives	395960	281310	407310	445230	316890	288610	453380	297320	299600	309410	316060	334750	0.369721	0.941559	-0.0868768	insig
MEDP594	Dihydroactinidiolide	Benzene and substituted derivatives	2744600	1021600	1368400	1169800	1369300	894670	2029200	5006100	1845000	1669100	2744900	1987000	1.28666	1.78345	0.834675	insig
MEDP603	Cuminaldehyde	Lipids_Fatty Acids	3052300	2211700	3033500	2500700	2369800	2685900	3820500	2465700	3294100	2432600	3148700	2872200	0.847862	1.1375	0.185866	insig
MEDP606	2-(3,4-dimethoxyphenyl)ethanamine	Benzene and substituted derivatives	21078000	11289000	13440000	16651000	11742000	15194000	15549000	13413000	10734000	11819000	20936000	14961000	0.0918138	0.977828	-0.0323467	insig
MEDP611	N-Acetyl-L-Histidine	Organic Acid And Its Derivatives	97625	148040	179010	163200	133910	392650	480490	299960	252620	137610	463380	230340	1.11813	1.67296	0.742399	insig
MEDP612	(S)-2,3-epoxysqualene	Terpenoid	407000	99942	85867	90742	66112	123670	216100	636220	131260	123400	177800	67473	0.61262	1.54838	0.630761	insig
MEDP617	2-Furoylglycine	Amino Acid metabolomics	83183	120100	106190	114980	132760	109330	201770	156680	254590	178410	94923	70328	0.78045	1.43532	0.52137	insig
MEDP618	2-Methylbutyroylcarnitine	Lipids_Fatty Acids	8104500	8698800	9274300	9290100	5916300	11478000	7657800	10997000	10245000	8558900	9363800	9551800	0.540361	1.06846	0.0955384	insig
MEDP627	Isonicotinic acid	Organic Acid And Its Derivatives	3155800	1797300	1751500	2837500	2401000	3079200	3370100	2965800	2849600	3602000	3392300	3188100	1.32002	1.28928	0.366562	insig
MEDP630	Methyl jasmonate	Lipids_Fatty Acids	35805	27523	35948	21326	28007	38924	36173	38241	27583	33568	21226	34530	0.200716	1.0202	0.0288507	insig
MEDP631	Dimethyl fumarate	Lipids_Fatty Acids	912770	1542500	924090	1058800	640500	752060	1135600	842670	1549200	814970	865680	982460	0.258103	1.06172	0.0864005	insig
MEDP636	Furfural	Organic Acid And Its Derivatives	706340	716350	687510	748640	698770	673930	822760	628670	733630	713330	744770	732100	0.487865	1.03396	0.0481859	insig
MEDP638	LysoPE(16:1(9Z)/0:0)	Lipids_Fatty Acids	41247	64992	67027	51545	21840	41548	58123	77869	42287	52990	39894	54604	0.572802	1.13035	0.176775	insig
MEDP642	3-Hydroxy-DL-kynurenine	Amino Acid metabolomics	156900	86929	102140	97259	59662	78597	133660	67662	79284	50128	79442	41085	0.838518	0.776047	-0.365785	insig
MEDP650	4,4'-Methylenedianiline	Benzene and substituted derivatives	17550	4770.2	5507.1	9855.6	6689.3	2358.2	15008	49732	14446	10159	25665	13424	1.37448	2.7484	1.45859	up
MEDP651	Diphenyl ether	Benzene and substituted derivatives	80252	46218	72479	60277	82768	51856	63435	70775	45219	61577	50146	59946	0.552132	0.891451	-0.165772	insig
MEDP653	Benzylcinnamate	Benzene and substituted derivatives	55295	24798	40373	38425	53578	38768	34624	63534	60159	40674	48616	36797	0.495943	1.13201	0.178893	insig
MEDP654	2-Phenylacetamide	Benzene and substituted derivatives	70834	59237	58698	54103	55650	54031	52136	40242	65151	40670	62032	45650	1.01619	0.867617	-0.20487	insig
MEDP656	Isoamyl butyrate	Fatty acyls	99972000	85720000	105830000	109540000	105940000	111580000	99194000	108010000	106020000	94829000	97337000	110820000	0.019625	0.996165	-0.00554276	insig
MEDP658	Ethyl dodecanoate	Fatty acyls	3384100	3424900	3474100	3689300	3604200	3836600	3532300	3561700	3664100	3296700	3651400	3593300	0.161944	0.99469	-0.00768084	insig
MEDP659	Propylpropionate	Fatty acyls	95647000	82113000	90348000	85375000	85437000	84513000	77567000	79086000	76529000	69288000	66151000	70864000	1.76824	0.83962	-0.252191	insig
MEDP668	m-Cresol	Phenols And Its Derivatives	431180	387680	366820	506280	369090	349980	249810	289090	322260	316850	354500	397720	1.35533	0.800583	-0.320877	insig
MEDP676	Butyl 3-methylbutanoate	Fatty acyls	59397000	56658000	61967000	66099000	61829000	67163000	57488000	59244000	64375000	63755000	63761000	65345000	0.0907588	1.00229	0.0033022	insig
MEDP681	2,2,2-Trichloroethanol	Alcohol	10771000	11479000	11802000	11446000	12235000	12513000	11199000	10620000	9647800	10491000	9758700	10043000	1.64886	0.879189	-0.185755	insig
MEDP685	Methylcysteine	Amino Acid metabolomics	1063000	723270	847910	866250	739680	917770	863050	841510	589780	721330	1096100	879270	0.22813	0.967653	-0.0474377	insig
MEDP686	2-Acetylfuran	Heterocyclic compound	26422000	26100000	24130000	25755000	24787000	25314000	21969000	22220000	25850000	26742000	26319000	25560000	0.456588	0.974769	-0.0368684	insig
MEDP688	Benzophenone	Benzene and substituted derivatives	43948	54947	48170	62993	52932	52125	54802	43724	47379	53123	52607	52586	0.37062	0.965428	-0.0507587	insig
MEDP692	Triethylamine	Hydrocarbon derivative	234100	193250	174980	206460	224110	210750	196800	195040	148420	181270	188500	256410	0.531996	0.937917	-0.0924684	insig
MEDP695	Methyl tetradecanoate	Fatty acyls	11109	13870	17468	14189	13266	15098	15114	20996	16241	23422	14540	19518	1.36661	1.29213	0.369751	insig
MEDP697	2,6-Di-tert-butyl-4-methylphenol	Benzene and substituted derivatives	1330900	1010400	855610	931630	859870	997890	780410	1082900	819450	664510	576100	711120	1.28495	0.774183	-0.369254	insig
MEDP700	Methyl beta-D-galactopyranoside	Carbohydrate metabolomics	296390	359720	274910	272220	273270	244120	284890	214770	179320	225030	250170	173050	1.42714	0.771363	-0.374518	insig
MEDP701	(E)-2-Octen-1-ol	Alcohol	12950000	16552000	14695000	17365000	13904000	14118000	13611000	11731000	11626000	12574000	13773000	12998000	1.44857	0.85186	-0.231312	insig
MEDP707	2-Pentadecanone	Ketones	1718500	1718800	1776700	1813000	1799000	1839900	1701900	1719600	1815600	1759000	1851700	1764900	0.201869	0.995012	-0.00721396	insig
MEDP709	Methyl dihydrojasmonate	Organic Acid And Its Derivatives	2625500	2541800	2567400	2751300	2703600	2761800	2617200	2595400	2696900	2640100	2791000	2620000	0.00429843	1.00058	0.000831837	insig
MEDP718	Methylisobutyrate	Organic Acid And Its Derivatives	560310	840920	581820	818260	623910	732140	701450	585820	508320	685030	693500	600400	0.649739	0.907913	-0.139374	insig
MEDP719	N-Nitrosodiethylamine	Polyamine	619840	808200	667110	815190	730500	854500	729720	583890	501920	725640	683630	647890	1.06699	0.86149	-0.215094	insig
MEDP724	3,5-Dinitrosalicylic acid	Organic Acid And Its Derivatives	1637500	1663400	1679700	1758700	2352700	1785400	1573300	1611900	1544100	1563800	1595900	1540800	1.3256	0.866917	-0.206035	insig
MEDP729	Barbituric acid	Heterocyclic compound	12792000	15776000	14729000	17535000	14995000	14810000	14664000	12152000	11710000	12328000	12787000	12551000	1.54711	0.840628	-0.250461	insig
MEDP752	DL-Leucine	Amino Acid metabolomics	265440000	265590000	232040000	258050000	232240000	252900000	320850000	288790000	289090000	290040000	303100000	296320000	1.84388	1.18717	0.247529	insig
MEDP767	Aspirin	Organic Acid And Its Derivatives	213010000	220540000	205110000	217460000	207620000	211800000	197920000	202080000	218360000	226390000	221640000	217070000	0.160913	1.00621	0.00893019	insig
MEDP775	Sulfamethazine	Benzene and substituted derivatives	6678.9	13419	11172	13967	11296	17804	15571	13336	13262	21924	9865.2	13310	0.678862	1.17396	0.231378	insig
MEDP778	Ethyl butyrate	Fatty acyls	30828000	32739000	28297000	28536000	27566000	26546000	24861000	22180000	24572000	26235000	25960000	25577000	1.62678	0.856016	-0.224291	insig
MEDP789	2-Pentyl-3-phenyl-2-propenal	Aldehyde	115570	112100	104510	111870	115640	124100	97141	106140	93513	100490	91582	94762	1.76761	0.853519	-0.228504	insig
MEDP792	Pyrrolidine	Heterocyclic compound	850640	705820	587080	683300	616310	775670	937180	823450	701130	948050	835020	856020	1.41714	1.20907	0.273898	insig
MEDP794	Octanal	Aldehyde	5383100	6718900	6408600	7288500	6338500	6151100	6673400	5485000	4939600	5399700	5515900	5708200	1.23252	0.880725	-0.183237	insig
MEDP796	Pyrene	Benzene and substituted derivatives	121660	113170	119550	119930	111200	130130	112310	103850	93548	114660	108100	103280	1.43063	0.888363	-0.170779	insig
MEDP799	(-)-Menthone	Ketones	5867200	6077900	5445700	5419400	5241600	4956500	4755900	4570200	4932800	4826500	5193600	5078200	1.5259	0.889388	-0.169114	insig
MEDP802	Diclofenac	Benzene and substituted derivatives	122240	122430	121220	126570	121570	114870	122420	131100	137830	127420	129690	119180	1.08194	1.05315	0.074709	insig
MEDP812	5-Methylfurfural	Aldehyde	2051500	2032600	1721700	1817300	1636600	1719800	1620700	1618400	1640400	1736900	1666500	1563900	1.33028	0.896835	-0.157085	insig
MEDP814	Methyl Valerate	Fatty acyls	9916400	10546000	8842300	8517400	8693300	8109600	7491600	7626000	7032200	8582400	7970900	7516600	1.52372	0.846127	-0.241053	insig
MEDP817	Propyl Hexanoate	Fatty acyls	7234200	7801300	7452600	7660200	7406800	7590600	6918200	7700200	7614300	8362400	7936400	8126100	0.725069	1.03349	0.0475235	insig
MEDP818	1-Pentadecanol	Alcohol	1972500	2066100	2133300	2183200	2117200	2098000	1958200	1925100	2009100	1946600	2086500	1934500	1.51136	0.943494	-0.0839151	insig
MEDP823	(R)-2-Hydroxy-3-phenylpropionic acid	Organic Acid And Its Derivatives	56498	44533	59023	46795	51278	50444	46456	40053	35855	24231	25353	25661	1.66316	0.6404	-0.642954	insig
MEDP831	1-Aminopropan-2-ol	Alcohol	401880	484230	331590	587650	296420	717190	162190	214740	232820	325740	392900	552380	1.04785	0.667186	-0.58384	insig
MEDP836	Dibutyl phthalate	Benzene and substituted derivatives	20840000	20837000	19844000	22620000	20827000	22249000	17783000	18685000	16802000	18247000	17017000	16897000	1.92243	0.828749	-0.270992	insig
MEDP843	Ethyl Isobutyrate	Fatty acyls	59358000	58974000	58285000	55939000	55088000	55329000	49249000	49700000	50747000	48756000	49844000	46376000	1.97925	0.85917	-0.218985	insig
MEDP844	Furfuryl alcohol	Alcohol	15595000	15788000	16065000	16033000	16090000	16775000	16778000	16939000	16566000	17466000	16488000	16892000	1.65954	1.04964	0.0699001	insig
MEDP845	1-Phenylethanol	Benzene and substituted derivatives	15106000	25105000	14505000	16365000	10334000	14325000	17365000	12034000	23373000	16596000	14121000	16633000	0.258059	1.04577	0.0645653	insig
MEDP849	Nα-Acetyl-L-glutamine	Amino Acid metabolomics	319430	144280	185880	179300	196970	249340	230960	221380	234250	253790	289320	276440	1.00893	1.1811	0.240132	insig
MEDP853	Choline chloride	Others	31107000	22449000	29469000	30274000	26753000	30498000	27645000	23606000	28257000	20433000	32645000	27874000	0.52057	0.940838	-0.0879811	insig
MEDP859	Glycylphenylalanine	Amino Acid metabolomics	400370	417920	246910	156480	385290	157570	349930	211920	286550	307070	271700	241890	0.0208394	0.94589	-0.0802563	insig
MEDP873	3'-UMP	Nucleotide metabolomics	57736	18472	34921	27874	56731	27405	43534	75625	48960	127620	132490	216310	1.51728	2.88851	1.53032	up
MEDP874	tryptophan betaine	Organic Acid And Its Derivatives	582550	460760	483720	273860	563390	589860	577990	718940	501450	824240	425500	492150	0.804997	1.19841	0.261121	insig
MEDP876	O-Succinyl-L-Homoserine	Amino Acid metabolomics	58061	63177	77140	71380	70097	67595	57735	51981	54122	48181	65804	64796	1.38385	0.840886	-0.250018	insig
MEDP878	N-Methyl-L-Glutamate	Amino Acid metabolomics	373430	580820	512170	537640	348900	678300	522870	599800	841080	623580	572710	580080	1.06759	1.23385	0.303167	insig
MEDP879	N-Methyl-D-Aspartic Acid	Amino Acid metabolomics	237260	186050	301150	233380	114200	284910	238660	267600	255530	237640	235260	200400	0.493995	1.05759	0.0807737	insig
MEDP881	Phosphocholine	Nucleotide metabolomics	491390	466070	430890	471780	488190	613020	457910	635290	422580	617310	426920	480450	0.202689	1.02672	0.0380395	insig
MEDP883	2,4-Dihydroxypteridine	Pteridines and derivatives	83579	57176	63014	46489	51330	60669	54627	71271	52127	39593	84843	46569	0.253201	0.963487	-0.0536625	insig
MEDP885	Mesoxalate	Organic Acid And Its Derivatives	1388600	1432100	1410300	1366200	1427500	1414500	1616400	1497000	1518300	1518900	1482900	1602800	1.84042	1.09445	0.130209	insig
MEDP886	N-Amidino-L-Aspartate	Organic Acid And Its Derivatives	258780	313100	295750	356600	292910	293980	317540	160960	185400	197720	274010	187430	1.46154	0.73052	-0.453004	insig
MEDP888	2'-Deoxycytidine 5'-Diphosphate	Nucleotide metabolomics	201260	188070	238840	235400	197720	158860	275600	183340	181970	183210	187600	193600	0.144551	0.987846	-0.0176423	insig
MEDP902	Omega-Hydroxydodecanoic Acid	Lipids	9522.7	10410	11013	10472	6789.3	8053.5	9446.1	8194.6	11290	9174.7	8151.8	7959.4	0.228015	0.963671	-0.0533877	insig

## Sheet: Table S3
Table S3. UPLC-MS/MS metabolomics analysis of muscle samples from goats fed A. sinensis leaves
Index	Compounds	Class	CON1	CON2	CON3	CON4	CON5	CON6	ASL1	ASL2	ASL3	ASL4	ASL5	ASL6	VIP	Fold_Change	Log2FC	Type
MEDN005	L-Threonine	Amino Acid metabolomics	1309000	2160600	1925900	1262400	2577200	3730800	2394100	2271900	2996200	2924100	2899800	4073600	1.2967	1.3543	0.437546	insig
MEDN007	L-Arginine	Amino Acid metabolomics	2639600	5414100	7448500	2668900	842900	1299100	4146300	7049400	1996100	4118700	3173000	1462400	0.396142	1.08038	0.111541	insig
MEDN010	L-Citrulline	Amino Acid metabolomics	22660000	21785000	8606800	14105000	4434200	23347000	2967900	8762000	9445600	11949000	11314000	9048900	1.05006	0.563393	-0.827787	insig
MEDN011	L-Glutamic Acid	Amino Acid metabolomics	10382000	11316000	12322000	15345000	10259000	17790000	6101200	25980000	27242000	14097000	7487600	12240000	0.172882	1.20324	0.266927	insig
MEDN012	L-Histidine	Amino Acid metabolomics	4904700	6638700	5638200	4880800	5920800	4809200	10468000	8096100	3245200	8462700	7399800	8166600	1.1441	1.39784	0.483195	insig
MEDN013	L-Isoleucine	Amino Acid metabolomics	38999	68632	60862	59712	60366	81370	87917	58660	74622	76242	42134	70115	0.521555	1.10745	0.147237	insig
MEDN018	L-Serine	Amino Acid metabolomics	2113300	4582400	2847900	2808200	1282000	4399000	1505500	6529400	5744600	2187800	2752600	3026600	0.377331	1.20594	0.27016	insig
MEDN019	L-Tryptophan	Amino Acid metabolomics	275200	320720	212610	286770	290470	299390	349560	180500	198340	250040	214410	236910	1.16621	0.848442	-0.237113	insig
MEDN022	(5-L-Glutamyl)-L-Amino Acid	Amino Acid metabolomics	681480	1088700	843320	958100	193410	996940	1065700	1464000	1290000	1509200	701050	1324800	1.264	1.54448	0.627124	insig
MEDN025	3-Hydroxy-3-Methylpentane-1,5-Dioic Acid	Amino Acid metabolomics	11044	2187.9	4362.9	3124.1	15937	9556.8	2147.6	20172	11457	10144	5729	5245.4	0.338287	1.18788	0.248385	insig
MEDN028	4-Hydroxy-L-Glutamic Acid	Amino Acid metabolomics	93910	99887	71741	81371	67960	99931	55493	82960	213790	123360	208180	79156	0.879198	1.48201	0.567556	insig
MEDN032	Allantoin	Organic Acid And Its Derivatives	26120000	28780000	22097000	13508000	24011000	19298000	29606000	22906000	23095000	21153000	20452000	18920000	0.207549	1.01732	0.0247772	insig
MEDN037	Dopamine	Polyamine	50814	59606	50055	68743	49939	53822	53076	51612	64556	49521	44400	51939	0.58619	0.946318	-0.0796031	insig
MEDN039	Glutathione Reducedform	Amino Acid metabolomics	8207100	6910700	7790300	5082600	14409000	5577700	11710000	3734900	2941000	8641600	7215100	6461100	0.622377	0.848393	-0.237195	insig
MEDN040	Glycyl-L-Proline	Amino Acid metabolomics	22335	27513	34698	23328	13906	74119	26955	32469	27845	35929	47115	35774	0.54978	1.05201	0.0731435	insig
MEDN041	Hexanoyl Glycine	Amino Acid metabolomics	33870	39435	26149	9831.2	54619	36399	25316	92283	145870	127400	161810	102570	1.78568	3.27129	1.70986	up
MEDN042	L-Asparagine Anhydrous	Amino Acid metabolomics	844920	979220	1093900	795100	863570	1983700	850500	1629600	1692700	855960	883060	1447700	0.500259	1.12181	0.165826	insig
MEDN043	L-Carnosine	Amino Acid metabolomics	358730000	468280000	398280000	349920000	412200000	341570000	574560000	491020000	225670000	517700000	467510000	520550000	0.756154	1.20096	0.264187	insig
MEDN045	L-Cysteine	Amino Acid metabolomics	108960	105260	188780	164810	128340	263620	101540	123910	143320	108870	139180	132050	0.955045	0.78026	-0.357973	insig
MEDN046	L-Glutamine	Amino Acid metabolomics	41824000	40006000	41283000	46475000	14203000	27526000	14659000	43906000	30205000	30398000	17557000	21857000	0.851005	0.750446	-0.41418	insig
MEDN049	L-Saccharopine	Amino Acid metabolomics	536230	539930	736220	1917500	302340	563940	880520	1047500	857370	556400	506970	441030	0.143637	0.933342	-0.099522	insig
MEDN055	N-Acetyl-L-Glutamic Acid	Amino Acid metabolomics	7872.6	6998.6	13157	2656.8	5476.9	5401.4	6024.5	8142.5	6100.3	10238	6491.9	6089.9	0.431655	1.03666	0.0519458	insig
MEDN057	N-Acetyl-L-Tyrosine	Amino Acid metabolomics	446.97	9	9	9	9	9	9	9	9	9	9	9	0.744692	0.109763	-3.18754	insig
MEDN058	N-Acetylneuraminic Acid	Amino Acid metabolomics	869080	1406000	852990	1012300	1259100	1423500	1628200	1334600	1719500	1520600	1180300	781990	0.80309	1.19672	0.259087	insig
MEDN061	N-Phenylacetylglycine	Amino Acid metabolomics	1783200	2626700	1785700	5713900	1902400	3253900	1188200	2062600	4722300	1236300	2097900	2269600	0.672026	0.795562	-0.329954	insig
MEDN062	N-Propionylglycine	Amino Acid metabolomics	152060	167740	99395	270900	99697	88319	59589	142940	342660	165360	92713	55253	0.356282	0.977684	-0.03256	insig
MEDN066	Phenylacetyl-L-Glutamine	Amino Acid metabolomics	6518.8	5541.7	10845	28763	9624.5	14357	4437.9	12745	13670	2525.5	5405.7	3124.3	1.20183	0.553978	-0.852101	insig
MEDN068	S-(5-Adenosy)-L-Homocysteine	Amino Acid metabolomics	1271000	1130100	763150	995960	850370	904800	832210	1031800	1326500	1369500	863830	1086000	0.640359	1.10049	0.138151	insig
MEDN086	Terephthalic Acid	Benzene and substituted derivatives	8952800	9108900	8906100	9147100	8424700	7715200	7505700	8426400	9098600	7672600	8191700	8152600	1.14041	0.938624	-0.091381	insig
MEDN092	3,4-Dihydroxybenzeneacetic Acid	Benzene and substituted derivatives	2823.2	1277.1	1540.1	99492	2800.5	4193.4	3631.5	6208	5613.3	8068.4	10726	6172.7	0.452262	0.360485	-1.47199	insig
MEDN096	Phthalic Acid	Benzene and substituted derivatives	31259	43458	34868	35003	29055	30049	24396	25952	25363	40080	30158	27628	1.20516	0.852154	-0.230814	insig
MEDN097	P–Hydroxyphenyl Acetic Acid	Benzene and substituted derivatives	39906	24587	23063	15741	11722	31150	8808.9	41788	68277	14397	24721	28393	0.270582	1.27513	0.350648	insig
MEDN105	Taurocholic Acid	Bile Acids	9	1732.8	9	9	9	9	1922.9	9	9	9	9	9	0.0135518	1.10693	0.146564	insig
MEDN106	Taurochenodesoxycholic Acid	Bile Acids	106020	107840	106540	79273	96402	87490	91176	89145	105040	97277	103870	105430	0.263221	1.01435	0.0205527	insig
MEDN109	Hyodeoxycholic Acid	Bile Acids	27826	9	9	39022	9	9	9	48689	9	9	9	9	0.444916	0.728635	-0.456732	insig
MEDN113	Glycochenodeoxycholic Acid	Bile Acids	484980	440740	347380	1216100	240710	901850	615040	1601600	647310	1388100	427100	625440	0.938352	1.46061	0.546572	insig
MEDN115	Chenodeoxycholic Acid	Bile Acids	975590	145010	40490	1292500	180130	182290	214630	2907400	1892500	50541	25410	131210	0.0205333	1.85429	0.890865	insig
MEDN120	Dulcitol	Carbohydrate metabolomics	512240	1354500	720950	805880	586070	1078300	741980	749720	587320	547040	1085800	891210	0.293525	0.910068	-0.135954	insig
MEDN141	2'-Deoxyuridine	Nucleotide metabolomics	19411	9489.4	3370.1	8027.9	17110	7460.8	6244.9	5974.4	16155	11691	4413.4	7560.3	0.387437	0.802214	-0.31794	insig
MEDN156	Cytidine-5-Monophosphate	Nucleotide metabolomics	1031300	653300	613800	988010	1081200	352710	1026800	807300	1039800	938250	927920	1194700	1.14013	1.25728	0.330307	insig
MEDN180	Norepinephrine	Hormones	62928	70939	63618	78978	81068	69238	66221	77055	73854	57018	56675	57798	1.00431	0.910612	-0.135092	insig
MEDN201	Succinic Acid	Amino Acid metabolomics	243240	62800	380070	213940	245590	50812	632870	149720	277800	1140900	362110	756110	1.49655	2.77446	1.47221	up
MEDN204	Pyruvic Acid	Amino Acid metabolomics	23962	5595.1	33162	15265	5653.3	6620.5	18342	5861.5	13030	9601.8	24277	23646	0.379849	1.04986	0.0701991	insig
MEDN206	Citramalic Acid	Amino Acid metabolomics	399480	361230	164880	330860	671690	405300	335010	558770	1432700	422530	438360	451600	1.02259	1.55949	0.641072	insig
MEDN209	Tryptamine	Tryptamines And Its Derivatives	112640	126430	108150	110510	125440	143820	169280	96689	103280	122650	113870	128070	0.0421059	1.00942	0.0135281	insig
MEDN211	D-Arabitol	Carbohydrate metabolomics	33013	53037	56731	22703	49259	82288	80294	57954	38150	43201	64771	76133	0.797909	1.21369	0.279398	insig
MEDN213	D-Sorbitol	Carbohydrate metabolomics	368220	1073700	517530	638950	445920	810800	558430	589000	456340	406880	833070	700840	0.204612	0.919442	-0.121169	insig
MEDN214	L-Arabitol	Carbohydrate metabolomics	302260	384810	989770	323480	152170	370850	674620	487880	318500	434740	840570	809920	1.09884	1.4133	0.499065	insig
MEDN220	D-Glucose	Carbohydrate metabolomics	1333400	1303500	1150300	1246900	1156800	766490	1215700	1218900	1538800	1442200	1774400	1697800	1.51732	1.27746	0.35328	insig
MEDN221	D-Mannose	Carbohydrate metabolomics	1614100	1733700	1495200	1751400	1745800	1144300	1687500	1689500	1958800	2013800	2590700	2363000	1.6208	1.2972	0.375402	insig
MEDN224	D-Trehalose	Carbohydrate metabolomics	35200	27550	12626	126490	35401	50917	9215.3	41808	41784	35985	74493	41370	0.134129	0.848955	-0.23624	insig
MEDN226	D-Erythronolactone	Carbohydrate metabolomics	9913.5	5711.5	3402.1	14239	61111	94751	12355	5957.9	14438	3423.7	27103	4329.5	0.752065	0.357467	-1.48412	insig
MEDN228	D-Arabinose	Carbohydrate metabolomics	233430	212530	302990	269460	217410	228300	251480	207510	305740	326110	426350	441430	1.35251	1.33775	0.419804	insig
MEDN231	L-Fucose	Carbohydrate metabolomics	23885	24750	49204	50547	35336	44720	52767	31329	87027	38977	42230	45273	0.939958	1.30275	0.381561	insig
MEDN232	L-Rhamnose	Carbohydrate metabolomics	8993.8	23234	23570	33111	31829	25225	28197	37625	54243	22013	26803	36369	1.13629	1.40618	0.491781	insig
MEDN233	Maltose	Carbohydrate metabolomics	64310	50900	14072	235050	29814	24406	10036	59513	68808	62082	136790	42897	0.164203	0.908193	-0.138929	insig
MEDN235	N-Acetyl-D-Glucosamine	Carbohydrate metabolomics	690290	730200	811920	711810	696820	1095300	677430	701170	733960	663160	690450	661750	1.1889	0.871542	-0.198358	insig
MEDN237	D-Glucoronic Acid	Carbohydrate metabolomics	127880	142200	128100	189460	130540	110940	169420	220990	294520	164330	190780	181130	1.81395	1.47285	0.558611	insig
MEDN240	L-Gulono-gamma-lactone	Carbohydrate metabolomics	164310	80961	131500	155170	90257	129850	137890	222920	135280	103060	146150	164970	0.935926	1.21039	0.27547	insig
MEDN241	Vitamin D3	CoOthersEnzyme Factor & vitamin	4080.8	2585.6	19383	9941.1	3221.7	969.42	1819.7	2358	5597.3	2383.1	2918.2	1715.9	0.828417	0.417907	-1.25874	insig
MEDN244	Orotic Acid	CoOthersEnzyme Factor & vitamin	9542.1	10514	8104	30879	5036.7	13023	11561	21116	23438	7145.8	6977.3	11100	0.263938	1.05499	0.0772229	insig
MEDN245	Pantothenate	CoOthersEnzyme Factor & vitamin	2831300	2876000	1710500	1575700	2999800	3103300	2807700	3267500	3273600	2692700	3330000	2328500	0.977734	1.17245	0.229526	insig
MEDN263	5-Hydroxyindole-3-Acetic Acid	Indole And Its Derivatives	1254.7	1525.1	1519.8	3092.3	7589.8	1175	3545.3	5239	5182.8	2329.3	11445	2041.3	1.21747	1.84337	0.882342	insig
MEDN266	Indole-3-Carboxaldehyde	Indole And Its Derivatives	362.57	980.81	525.15	1001.6	6313.2	999.85	617.76	2964.2	3041.2	405.08	3190.4	3273.4	0.693459	1.32493	0.40592	insig
MEDN280	2-Aminoethanesulfonic Acid	Organic Acid And Its Derivatives	137660000	47591000	177410000	144560000	80841000	48458000	192920000	64020000	10741000	35925000	187690000	126050000	0.448307	0.969877	-0.0441266	insig
MEDN283	2-Hydroxybutanoic Acid	Organic Acid And Its Derivatives	402080	591280	264450	724480	1080500	633170	519410	992730	744850	635660	522530	459970	0.352783	1.04848	0.068303	insig
MEDN285	2-Methylsuccinic Acid	Organic Acid And Its Derivatives	108280	88377	43041	97128	113860	62186	110310	134290	103300	126270	123800	86492	1.32691	1.33457	0.416372	insig
MEDN290	3-Hydroxy-3-Methyl Butyric Acid	Organic Acid And Its Derivatives	68682	75768	108480	154680	106360	65564	112750	77305	128280	91134	89785	93619	0.285914	1.02302	0.0328298	insig
MEDN292	3-Hydroxybutyrate	Organic Acid And Its Derivatives	1421400	1249100	1595700	2476600	1907300	2109900	1824600	1742300	3821400	2106000	2550000	2117900	1.17617	1.31619	0.396367	insig
MEDN293	3-Hydroxypropanoic Acid	Organic Acid And Its Derivatives	16009	23199	16871	22440	18365	17759	18039	12612	22215	21368	17151	23193	0.0684155	0.999433	-0.000818208	insig
MEDN297	4-Hydroxy-2-Oxoglutaric Acid	Organic Acid And Its Derivatives	1716	5944	5807.5	3386.3	4554.7	2123.6	2654.8	4439.1	3933.6	3410.1	1685.4	2233.5	0.58196	0.780062	-0.358339	insig
MEDN299	Adipic Acid	Organic Acid And Its Derivatives	109480	89101	87238	134920	87859	104730	72114	67682	106690	58696	87864	92269	1.38715	0.791281	-0.337737	insig
MEDN300	Azelaic Acid	Organic Acid And Its Derivatives	5711400	4606700	4464200	8691700	4710500	5322400	4251500	4311000	5242700	5929100	4497200	4913300	0.775522	0.869815	-0.20122	insig
MEDN301	Caffeic Acid	Organic Acid And Its Derivatives	95921	35303	25419	74681	23300	81880	83497	182400	94759	83883	87068	52347	1.37063	1.73536	0.795231	insig
MEDN305	Creatine	Organic Acid And Its Derivatives	113260000	126070000	113630000	97177000	115810000	127800000	109430000	108580000	133270000	115620000	106540000	121570000	0.0514628	1.00182	0.00262411	insig
MEDN311	Dodecanedioic Aicd	Organic Acid And Its Derivatives	4555	4075.5	3422.5	3633.2	4028.5	4207.1	2676.7	4196.1	4594.3	3943.3	4467.7	3994.5	0.0900995	0.997943	-0.00297025	insig
MEDN314	Glutaric Acid	Organic Acid And Its Derivatives	53263	38890	50454	39932	46991	34898	113520	73257	101030	121780	93456	79986	2.31035	2.20487	1.14069	up
MEDN316	Guanidinoethyl Sulfonate	Organic Acid And Its Derivatives	13868	14485	14020	23583	17265	13974	16746	96288	6068.4	8353.4	12340	12399	0.0813596	1.56587	0.646965	insig
MEDN317	Hippuric Acid	Amino Acid metabolomics	1136700	346070	476520	719280	1042800	595450	956050	1850800	1050400	866920	940740	470790	0.99847	1.42135	0.507259	insig
MEDN320	Hydrocinnamic Acid	Organic Acid And Its Derivatives	8560.8	900.43	5846.1	2329.5	121280	2881.9	2402	1434.4	12248	1841.7	7656.5	4094.8	0.44924	0.209292	-2.25641	insig
MEDN322	Kinurenine	Organic Acid And Its Derivatives	160450	125120	142270	173740	96013	91826	101760	201570	196750	103180	68454	92514	0.309599	0.968089	-0.0467881	insig
MEDN324	L-3-Phenyllactic Acid	Organic Acid And Its Derivatives	42347	43934	43287	41335	46229	33483	36166	46157	120860	39656	45235	47774	0.834133	1.3401	0.422336	insig
MEDN325	L-Lactic Acid	Organic Acid And Its Derivatives	6293200	5976100	4914700	5622700	5856200	4018100	6519500	5596800	5889200	6590200	5483300	6168900	1.08681	1.10914	0.149445	insig
MEDN326	L-Tartaric Acid	Organic Acid And Its Derivatives	4358.6	1106.2	3852.2	3781.1	2925.3	4688.1	6885.7	1488.9	1117.6	1825.9	3853.1	2771.7	0.554529	0.866325	-0.207019	insig
MEDN327	L-Dihydroorotic Acid	Organic Acid And Its Derivatives	217440	241960	188770	215560	210410	131500	243340	243120	218860	238910	229180	223980	1.26759	1.15904	0.212936	insig
MEDN333	Malonicacid	Organic Acid And Its Derivatives	1534700	1489700	1587600	2712900	1920800	2118200	1844300	2029500	4063700	2358100	2860900	2225100	1.30389	1.35355	0.436748	insig
MEDN334	Mandelic Acid	Organic Acid And Its Derivatives	38958	36794	31686	20864	26928	42439	14640	48058	94746	14131	34039	45193	0.139694	1.26882	0.343491	insig
MEDN335	Methylmalonic Acid	Organic Acid And Its Derivatives	3238800	830180	4681000	2872500	2802800	621870	7461500	1398100	3727200	14909000	4297000	9619200	1.39196	2.75215	1.46056	up
MEDN338	Phenyllactate (Pla)	Organic Acid And Its Derivatives	25436	26763	23447	36093	36129	29767	35984	29146	41274	33970	26607	41277	1.10508	1.17239	0.229456	insig
MEDN340	Pyrrole-2-Carboxylic Acid	Organic Acid And Its Derivatives	262.68	6150.5	1175.7	3270.5	527.45	5237.5	6306.5	4892.6	3592.6	1249.7	680.27	4082	0.617396	1.2514	0.323542	insig
MEDN342	Sebacate	Organic Acid And Its Derivatives	168.36	209.61	4027.4	2355.4	322.9	493.85	576.06	97.39	308.97	195.99	209.68	186.69	1.19969	0.207823	-2.26658	down
MEDN344	Subericacid	Organic Acid And Its Derivatives	281870	228770	246110	266720	228380	251860	235170	216340	277260	250820	241280	230960	0.563637	0.965499	-0.0506538	insig
MEDN346	Vanillic Acid	Organic Acid And Its Derivatives	493.16	3438.5	637.97	959.02	783.01	7465.4	1877.7	13965	18595	4983.7	3452.9	10742	1.67415	3.89171	1.9604	up
MEDN348	TXB2 [9α,11,15S-trihydroxythromba-5Z,13E-dien-1-oic acid]	Oxidized lipid	9351	6394.8	3184.7	7662.1	3077.3	4105.9	1515.4	4598.8	10622	2025	1919.2	2131.5	1.11965	0.675392	-0.566203	insig
MEDN351	12-Hete	Lipids	25255	7325.5	3341.9	20350	15472	8567.7	3363	5155.1	10810	8693.4	4328.1	6654.7	1.15992	0.485659	-1.04198	down
MEDN362	Lysope 18:1	LipidsOthersPhospholipid	12458000	8775300	4263800	8750500	5135900	4548000	6704400	13422000	17309000	9149900	9524400	11915000	1.41125	1.54843	0.630803	insig
MEDN364	Lysope 18:0	LipidsOthersPhospholipid	31122000	22924000	8715800	25077000	10923000	6795000	13788000	28800000	31527000	18858000	16395000	15100000	0.708571	1.17916	0.237755	insig
MEDN366	Lysope 16:0	LipidsOthersPhospholipid	2815700	2888100	909110	1878000	1451900	1018900	1126200	2525900	4335600	1766800	1628000	1764300	0.537579	1.19934	0.262239	insig
MEDN368	Lysope 14:0	LipidsOthersPhospholipid	12230	7317.1	5335.9	8809.2	6730.5	4359.6	4718.5	8596.6	17205	7797.1	9779.9	7431.4	0.668514	1.23997	0.3103	insig
MEDN370	Lysopa 18:0	LipidsOthersPhospholipid	10358	15593	2747.9	12596	5007.7	764.47	6222.8	8967.4	22896	8298.2	8933.2	265.55	0.00304086	1.18093	0.23993	insig
MEDN372	Lysopa 16:0	LipidsOthersPhospholipid	67013	89093	41792	62153	50118	38975	48172	71732	99114	69948	58868	56839	0.761263	1.15904	0.212934	insig
MEDN374	9-Hpode	Lipids	10796	8733.1	7563.8	11486	9581	13436	7114.6	6785	11731	25088	13719	11227	0.448484	1.2284	0.296784	insig
MEDN375	13-HOTrE [13S-hydroxy-9Z,11E,15Z-octadecatrienoic acid]	Oxidized lipid	15683	10768	11563	26404	11539	8824.6	9003.9	15337	13659	14831	9823.9	6340.3	0.669855	0.813798	-0.297257	insig
MEDN376	9,10-DiHOME [(±)9,10-dihydroxy-12Z-octadecenoic acid]	Oxidized lipid	128250	130070	128480	143820	130320	136760	120170	125390	133630	143360	139760	132320	0.115984	0.996151	-0.00556302	insig
MEDN378	γ-Linolenic Acid(C18:3N6)	Lipids_Fatty Acids	4057.2	129.89	1848.8	3270.3	4743.8	2112.6	188.72	4590.7	4492.9	8960.2	5033.5	6687.3	0.610857	1.85325	0.890058	insig
MEDN379	Tridecanoic Acid	Lipids_Fatty Acids	1840.2	2681.3	1127	3715.3	1930.4	1639	2544.9	1579.7	1154.7	3009.5	863.3	2477.5	0.381922	0.899205	-0.153278	insig
MEDN380	Palmitoleic Acid (C16:1)	Lipids_Fatty Acids	825810	655830	552040	869600	914720	719270	789750	731450	709340	802640	798290	712480	0.137005	1.00147	0.00212245	insig
MEDN381	Hexadecanoic Acid (C16:0)	Lipids_Fatty Acids	1853700	1754800	1705500	1963200	2276900	1442700	2112100	1499500	1460900	1873900	1594600	1728200	0.613216	0.933835	-0.09876	insig
MEDN383	Linoleic Acid (C18:2N6C)	Lipids_Fatty Acids	738480	892600	546570	933440	834020	652270	600960	659230	1135800	1050500	695720	822140	0.391521	1.07982	0.110793	insig
MEDN385	Dodecanoic Acid(C12:0)	Lipids_Fatty Acids	289880	225700	230090	290190	257860	221920	216810	209410	213070	279260	224840	251870	0.867563	0.920575	-0.119393	insig
MEDN388	Elaidic Acid (C18:1N9T)	Lipids_Fatty Acids	4815.7	4230.7	3162.8	4930.3	5124.1	4786.8	4758.9	4460.3	3516.8	5259.7	4203.2	3677.8	0.357949	0.956611	-0.0639963	insig
MEDN390	EPA [5Z,8Z,11Z,14Z,17Z-eicosapentaenoic acid]	Oxidized lipid	966910	1300000	399270	949160	505930	301110	801540	1025000	1323000	788590	599750	703270	0.77519	1.18514	0.24506	insig
MEDN391	DHA [4Z,7Z,10Z,13Z,16Z,19Z-docosahexaenoic acid]	Oxidized lipid	21252	21978	12159	15856	18752	19590	17969	15489	28582	20311	23670	18185	0.729905	1.1334	0.180658	insig
MEDN394	Cis-11,14-Eicosadienoic Acid (C20:2)	Lipids_Fatty Acids	1066.9	617.57	553.28	731.06	808.9	783.16	778.94	1057.3	584.3	849.35	717.09	534.86	0.0818158	0.991442	-0.0123991	insig
MEDN395	Cis-11,14,17-Eicosatrienoic Acid (C20:3)	Lipids_Fatty Acids	239210	250610	246220	243490	247970	254530	290780	274220	259870	262530	273590	276720	2.14821	1.10505	0.144105	insig
MEDN399	Arachidic Acid(C20:0)	Lipids_Fatty Acids	12345	9039.7	5733.6	6427.2	204450	7590.5	3554.5	61723	35927	44426	21440	12057	0.505969	0.729388	-0.455241	insig
MEDN400	Α-Linolenic Acid(C18:3N3)	Lipids_Fatty Acids	5649.6	8603.7	4052.9	7720.8	7798.9	4488	5023.1	5208.7	8373.5	10031	7096.1	7258.2	0.582266	1.12206	0.166153	insig
MEDN406	3-(3-Hydroxyphenyl)Propionate Acid	Organic Acid And Its Derivatives	330.92	887.36	643.2	699.45	2776.8	625.15	6551.9	515.5	783.75	3846.1	643.48	276.02	0.433437	2.11588	1.08126	insig
MEDN411	Neopterin	Pteridines and derivatives	66294	80219	71634	75498	70136	78969	59497	90652	82741	74862	81034	79639	0.605205	1.05799	0.0813258	insig
MEDN415	2-(Formylamino)Benzoic Acid	Benzene and substituted derivatives	603.93	3001.6	2738.1	377.63	1644.4	1176.9	13883	1883.1	2995.1	850.01	2238.2	1013.9	0.847218	2.39593	1.26059	insig
MEDN416	Ureidoisobutyric Acid	Organic Acid And Its Derivatives	1009	881.5	430.26	573.95	853.5	573.62	869.83	568.95	1924.3	870.33	855.67	571.29	0.734384	1.30972	0.389254	insig
MEDN418	Acetaminophen Glucuronide	Carbohydrate metabolomics	819.98	396.56	781.67	565.39	426.93	866.49	520.31	626.01	843.16	478.19	920.94	622.83	0.260229	1.04004	0.0566336	insig
MEDN429	3-Hydroxyhippuric Acid	Organic Acid And Its Derivatives	1403.8	6551.2	6001.7	2122.2	2722.8	5458.2	8447.3	19697	129170	2482.8	2183.3	4900.8	1.03026	6.87889	2.78218	up
MEDN432	5-Hydroxyhexanoic Acid	Organic Acid And Its Derivatives	28360	28774	23605	33648	52318	23903	62499	38413	68170	50026	40913	34956	1.62625	1.54756	0.629994	insig
MEDN434	Pseudouridine	Nucleotide metabolomics	160120	118690	118410	89535	120110	233180	135860	170760	191710	157170	211940	163210	1.14714	1.2269	0.295016	insig
MEDN452	2'-Deoxycytidine-5'-Monophosphate	Nucleotide metabolomics	193990	138440	142240	120610	246590	120740	198370	63167	75442	179700	212480	191600	0.35773	0.956523	-0.0641278	insig
MEDN455	Guanine	Nucleotide metabolomics	7562.1	3999	9569.4	8924.1	12958	56140	5637.7	5828.3	15073	13684	11699	18405	0.074116	0.70928	-0.495572	insig
MEDN461	D-Sedoheptuiose 7-Phosphate	Carbohydrate metabolomics	16526	24651	26145	27807	11707	21642	25287	21522	30041	24054	29426	29209	1.19321	1.24176	0.312388	insig
MEDN478	Aminomalonic Acid	Organic Acid And Its Derivatives	130980	30510	180230	116230	103700	24325	256400	75209	141920	527520	163550	377930	1.47735	2.63241	1.39639	up
MEDN480	DL-Glyceraldehyde-3-Phosphate	Organic Acid And Its Derivatives	11497000	772020	621400	26414000	881370	894990	875040	3043500	23420000	13280000	1446000	12158000	0.738243	1.3199	0.400429	insig
MEDN487	Allysine	Organic Acid And Its Derivatives	16631	13936	38908	11135	3372	10582	3916.4	5282.1	6865.9	15016	26602	10443	0.532429	0.720416	-0.473098	insig
MEDN491	9-HOTrE [9S-hydroxy-10E,12Z,15Z-octadecatrienoic acid]	Oxidized lipid	19940	23314	19988	23221	23883	21343	22537	22465	26295	31225	22694	24215	1.32449	1.13473	0.182345	insig
MEDN494	8,15-Dihete	Lipids_Fatty Acids	84820	63673	66567	89683	97525	75829	84098	73100	77989	88771	89877	75458	0.314562	1.02342	0.0333953	insig
MEDN498	Ribulose-5-Phosphate	Carbohydrate metabolomics	27710000	46742000	26721000	14387000	37694000	17862000	46844000	24046000	14834000	24158000	33350000	16645000	0.23399	0.934319	-0.0980123	insig
MEDN499	Argininosuccinic acid	Organic Acid And Its Derivatives	3333400	4836300	2256500	1477400	3246300	1896500	4715900	2178100	1719400	3582000	7910300	3165800	0.686301	1.36519	0.449097	insig
MEDN501	Acetyl Tryptophan	Amino Acid metabolomics	2910.5	1999.7	1405	14546	12681	5525.1	7907.3	1845.4	1468.5	17212	3069.6	26421	0.280715	1.48267	0.568195	insig
MEDN502	2-Deoxyribose 1-Phosphate	Carbohydrate metabolomics	221960	233730	201060	240660	253930	189280	303730	258980	335150	224160	226270	160270	0.606297	1.12527	0.170272	insig
MEDN506	N-Acetylglucosamine 1-Phosphate	Carbohydrate metabolomics	686950	1608300	1453700	1078700	1358900	1859100	857440	1343700	828040	741100	664070	569300	1.56631	0.621907	-0.685228	insig
MEDN523	Indolelactic acid	Indole And Its Derivatives	290.54	447.47	342.83	1422	317.53	447.39	1534.7	537.21	646.35	563.75	1493.2	562.3	1.19494	1.63338	0.707865	insig
MEDN530	Pimelic acid	Organic Acid And Its Derivatives	198740	110320	82826	152970	93688	75928	80433	100380	264480	142590	118410	79178	0.205232	1.09937	0.136681	insig
MEDN533	Xanthosine	Nucleotide metabolomics	271220	395180	136620	204620	274550	431080	197020	300690	460940	343030	402820	305330	0.706516	1.1731	0.230321	insig
MEDN539	3'-Sialyllactose	Carbohydrate metabolomics	4460.6	1110.6	449.72	4730.6	3905.4	7789.9	2793.2	6701	4531.9	1133.2	1385.5	2794.9	0.0395889	0.861579	-0.214946	insig
MEDN540	1-Methylguanine	Nucleotide metabolomics	435.27	1150.9	2140	431.1	718.98	1942.7	1436.3	284.9	11009	5311.4	1140.6	1151.2	0.804006	2.9819	1.57623	insig
MEDN541	DL-3,4-Dihydroxyphenyl glycol	Benzene and substituted derivatives	39281	30205	29046	74464	45664	30303	37367	31734	38476	50422	28550	45851	0.112435	0.933472	-0.0993213	insig
MEDN553	2-Methylbenzoic acid	Benzene and substituted derivatives	149380	135960	113260	144870	218610	754750	124890	266780	145740	245110	105650	320310	0.108687	0.796714	-0.327866	insig
MEDN554	2-(4-Hydroxyphenyl)ethanol	Benzene and substituted derivatives	2631.4	83693	81530	146660	106370	76236	790340	4427.8	1173000	411720	161490	128990	0.879208	5.37087	2.42516	insig
MEDN556	Cinnamoylglycine	Organic Acid And Its Derivatives	482.32	408.27	460.13	161.74	585.48	794.5	324.53	315.19	414.17	379.76	248.87	552.63	0.57014	0.772756	-0.371915	insig
MEDN560	Marmesin	Carbohydrate metabolomics	4526.2	6355.6	1954.4	1706.8	1521	2118.6	739.25	972.29	845.62	1760	911.76	2194.4	1.63996	0.408265	-1.29242	down
MEDN568	2-Methylguanosine	Nucleotide metabolomics	51553	46857	34558	45508	45063	51111	55957	63487	85216	51444	49982	48992	1.49146	1.29284	0.370542	insig
MEDN569	DL-o-Tyrosine	Organic Acid And Its Derivatives	85821	92761	79352	115820	94999	157850	114730	122110	90796	118560	90805	77832	0.0590677	0.981216	-0.0273571	insig
MEDN570	L-Erythrulose	Carbohydrate metabolomics	2236.8	3911.4	8472.2	11806	6168.6	3366	11267	1395.6	5047	2237.4	2245.1	11830	0.387428	0.946083	-0.0799609	insig
MEDN571	3-Methoxybenzenepropanoic acid	Carbohydrate metabolomics	6806.9	10073	8740.8	7649.7	7298.3	7750	10097	8018	8887.5	8516.9	6446	9033	0.491456	1.05546	0.0778703	insig
MEDN579	N-lactoyl-phenylalanine	Organic Acid And Its Derivatives	95249	106090	138830	88833	109850	145690	316240	141200	148030	175450	208340	277220	1.90904	1.85011	0.887613	insig
MEDN581	Imidazoleacetic acid	Organic Acid And Its Derivatives	320240	419730	434030	354990	416830	379180	436550	449640	390990	433080	432250	463940	1.44703	1.12105	0.164855	insig
MEDN587	N-Acetylvaline	Organic Acid And Its Derivatives	6222.6	17468	6497.5	12304	9628.7	19333	1944.5	26172	11369	2203.8	16646	26554	0.245993	1.18803	0.248572	insig
MEDN588	Glycerol 3-phosphate	Lipids_Fatty Acids	21461000	2446800	5711300	17880000	1717000	2574600	3068000	19223000	2483000	20320000	6589900	3791300	0.266667	1.07114	0.0991499	insig
MEDN593	D-(+)-Malic acid	Amino Acid metabolomics	8304100	4744200	6428100	7783700	10312000	3839600	9298700	11705000	16411000	22515000	6171400	7215700	1.38595	1.77044	0.824105	insig
MEDN594	m-Coumaric acid	Benzene and substituted derivatives	7564.5	3498.8	2571.8	20392	6404.6	22299	21502	8011.9	25609	21039	9465.4	24246	1.27436	1.75151	0.808597	insig
MEDN604	Tetradecanedioic acid	Lipids_Fatty Acids	68659	64535	66689	65214	86934	63816	66967	86376	78538	84960	81888	72877	1.3776	1.13409	0.181529	insig
MEDN606	5-Methoxytryptophol	Indole And Its Derivatives	109500	6796.2	83003	3662.3	1224	2963.2	6475.7	9883	4727	83951	3094.1	4867.4	0.101081	0.545493	-0.874367	insig
MEDN611	6-β-hydroxytestosterone	Hormones	5784.9	34754	23742	63728	5340.2	38651	35932	4963.8	5124.1	4578.9	4760.5	25866	1.01761	0.47224	-1.08241	down
MEDN621	Indoxylsulfuric acid	Organic Acid And Its Derivatives	182.32	291.15	228.29	91.71	90.15	223.35	177.98	135.52	69.37	112.64	44.7	207.52	0.978178	0.675474	-0.566027	insig
MEDN623	Salicyluric acid	Benzene and substituted derivatives	2805.5	9	9	5680.8	5304.1	9	220590	29812	600620	78909	8255.8	4726.3	1.85264	68.241	6.09257	up
MEDN625	Formononetin	Carbohydrate metabolomics	241130	251300	398760	235740	336630	280080	258590	335170	252750	277390	198500	171040	0.915243	0.856507	-0.223463	insig
MEDN632	N-Oleoyl Glycine	Organic Acid And Its Derivatives	5667	4569.8	4233.2	4738.7	4699.4	4110.4	4510.4	8377.6	4980.6	4909.7	5298.2	5748.7	1.21026	1.20725	0.271719	insig
MEDN651	Succinic anhydride	Organic Acid And Its Derivatives	792320	657370	1259200	1092700	1017300	2285100	616860	693380	717390	661910	808710	926560	1.40822	0.622863	-0.683014	insig
MEDN656	Indoleacetaldehyde	Indole And Its Derivatives	918080	1108700	915960	916840	1073800	1169100	1374500	895240	855670	1035100	1057500	1079600	0.214851	1.03198	0.0454088	insig
MEDN658	Hexadecanedioic acid	Lipids_Fatty Acids	108530	133940	118930	114950	543920	123830	104210	220160	224700	222990	213100	127850	0.387454	0.972826	-0.0397466	insig
MEDN659	Pyrophosphate	Organic Acid And Its Derivatives	33941000	62459000	32115000	13881000	62911000	39698000	56050000	56322000	24479000	26692000	32772000	15146000	0.378965	0.863089	-0.21242	insig
MEDN661	Vanillylmandelic acid	Benzene and substituted derivatives	12838	11970	15486	15873	9952.3	15246	15326	12843	16301	11854	11499	18909	0.449708	1.06596	0.0921507	insig
MEDN662	γ-glutamyl-Leucine	Amino acid metabolomics	13880	66652	36433	83815	54939	59456	66091	158870	115530	118910	104040	127510	1.75005	2.19228	1.13243	up
MEDN673	Isopropyl myristate	Fatty acyls	86568	85012	78790	95378	86525	94622	94563	104330	91514	98436	96196	93143	1.62003	1.09734	0.134008	insig
MEDN682	Octadecanamide	Fatty acyls	50763	54244	51986	51718	47115	48172	47833	47908	50968	53669	46944	51340	0.440928	0.982447	-0.0255481	insig
MEDN685	Undecanedioic acid	Fatty acyls	231.5	250.08	712.75	387.04	370.57	83627	292.76	1521	752.37	317.02	567.98	204.83	0.509533	0.0427203	-4.54893	insig
MEDN686	Methyl propyl disulfide	Others	228850	257800	347680	208900	205460	211910	359300	234310	558080	212000	199930	304490	0.828009	1.279	0.355018	insig
MEDN694	2-nonanol	Alcohol	157420	148370	171500	280950	275050	313250	118340	155860	220940	157050	181860	157080	1.21025	0.736057	-0.442111	insig
MEDN704	Oxaloacetic acid	Organic Acid And Its Derivatives	170400	157990	91560	111690	55318	178080	43063	90937	84243	143620	121000	100460	0.768629	0.762476	-0.391236	insig
MEDN719	2-n-Pentylfuran	Heterocyclic compound	309.09	859.33	297.28	964.75	365.59	298.46	1752.9	273.9	1825.1	1781.4	353.14	287.36	0.785477	2.0274	1.01963	insig
MEDN720	N-(2-Methylbenzoyl)glycine	Amino Acid metabolomics	17343	23613	19552	64229	22897	33625	13432	22794	55737	12277	23907	26311	0.479294	0.85214	-0.230838	insig
MEDN725	Sorbic acid	Organic Acid And Its Derivatives	445290	486650	434480	351860	485140	354240	396460	348660	360460	338910	278990	323310	1.68399	0.800259	-0.321461	insig
MEDN727	Methyl hexadecanoate	Fatty acyls	372040	353590	380660	355040	345300	362540	385580	369820	365670	347810	377770	362570	0.664379	1.01846	0.026394	insig
MEDN730	4-Ethylphenol	Phenols And Its Derivatives	138630	147810	272570	142290	140560	159270	271780	130090	327790	89674	141850	370760	0.575574	1.33044	0.411904	insig
MEDN731	4-tert-Octylphenol	Phenols And Its Derivatives	801310	785610	808500	872010	771700	801720	804690	774390	830180	770640	774680	809390	0.568293	0.984118	-0.0230961	insig
MEDN732	Ricinoleic Acid	Fatty acyls	47912	43052	49921	61150	55811	60097	62711	61147	53885	60450	51719	58719	1.0798	1.09652	0.132933	insig
MEDN733	Phenyl-β-D-Glucopyranoside	Carbohydrate metabolomics	15234	13495	12816	15389	18425	12327	15929	12353	10704	16996	12031	13876	0.587616	0.933889	-0.0986768	insig
MEDN734	Cis-3-Hexenylacetate	Fatty acyls	76318000	68831000	79819000	130230000	126690000	144820000	60919000	81295000	104390000	71672000	78165000	73220000	1.19924	0.74941	-0.416174	insig
MEDN739	4-Hydroxybenzyl alcohol	Benzene and substituted derivatives	20578	20858	16838	17996	22367	21242	25959	33420	16208	19978	49275	38049	1.36348	1.52561	0.609389	insig
MEDN741	Methanesulfonic acid	Others	365810	286430	462940	341400	327680	368350	516790	470570	200630	276320	527290	356260	0.16723	1.0907	0.125259	insig
MEDN743	2-Nonanone	Ketones	95368000	86135000	97675000	159830000	152280000	171540000	75827000	97681000	126830000	88147000	96540000	90874000	1.23624	0.754953	-0.405542	insig
MEDN745	Propylparaben	Benzoic Acid And Its Derivatives	10550	9682.2	6745.8	9980.2	7730	10558	10618	6617.3	6831.5	6178.2	8648.3	9087.7	0.946738	0.868494	-0.203412	insig
MEDN747	2,4-Di-tert-butylphenol	Phenols And Its Derivatives	61757	66831	66865	68677	70277	66312	71597	60866	64444	65238	70145	63136	0.392185	0.986791	-0.0191832	insig
MEDN748	Methylparaben	Benzoic Acid And Its Derivatives	533.46	912.46	1134	860.89	1181.6	1200.5	356.14	914.5	1394.4	12279	1330.6	18797	1.03309	6.02304	2.59049	up
MEDN750	(±)12-HEPE [(±)-12-hydroxy-5Z,8Z,10E,14Z,17Z-eicosapentaenoic acid]	Oxidized lipid	238.04	92.24	141.2	221.32	74.36	221.36	212.46	152.44	144.96	98.16	140.56	142.54	0.127039	0.901469	-0.14965	insig
MEDN751	(±)12-HETE [(±)12-hydroxy-5Z,8Z,10E,14Z-eicosatetraenoic acid]	Oxidized lipid	68946	15514	11811	53222	41796	25684	7355.3	13350	29509	18452	7941.2	17367	1.3818	0.433116	-1.20717	down
MEDN756	(±)18-HEPE [(±)-18-hydroxy-5Z,8Z,11Z,14Z,16E-eicosapentaenoic acid]	Oxidized lipid	995.73	830.45	90.92	802.45	168.21	568.82	470.97	310.54	1421.5	1257.6	1697.3	879.45	1.03559	1.74663	0.804573	insig
MEDN760	(±)5-HETE [(±)5-hydroxy-6E,8Z,11Z,14Z-eicosatetraenoic acid]	Oxidized lipid	12795	494.94	327.83	2513.1	339.82	205.34	135.48	161.2	196.31	142.62	631.49	67.15	1.45057	0.0800101	-3.64367	down
MEDN763	(±)9-HETE [(±)-9-hydroxy-5Z,7E,11Z,14Z-eicosatetraenoic acid]	Oxidized lipid	693.46	115.83	96.8	302.25	370.42	138.92	96.12	69.46	162.69	94.26	508.6	176.94	0.752802	0.645097	-0.632412	insig
MEDN765	11,12-EET [(±)11,(12)-epoxy-5Z,8Z,14Z-eicosatrienoic acid]	Oxidized lipid	42755	27333	8635.1	15493	8022.6	8171.2	5994	14494	26456	10108	9874.8	9031	0.567594	0.687962	-0.5396	insig
MEDN767	12,13-EpOME [(±)12(13)epoxy-9Z-octadecenoic acid]	Oxidized lipid	809.76	1372.8	833.78	26076	38436	1251.2	181.96	796.63	32844	27760	1336.2	26418	0.182931	1.29889	0.377275	insig
MEDN768	13-oxoODE [13-oxo-9Z,11E-octadecadienoic acid]	Oxidized lipid	58121	46520	47929	53940	49012	48665	46494	50010	64383	49358	53626	48893	0.342571	1.0282	0.040116	insig
MEDN769	14(S)-HDHA [14S-hydroxy-4Z,7Z,10Z,12E,16Z,19Z-docosahexaenoic acid]	Oxidized lipid	235.21	162.14	116.33	92.59	127.32	46.27	81.73	91.28	94.22	355.58	72.66	139	0.0410467	1.07003	0.097645	insig
MEDN775	20-HETE [20-hydroxy-5Z,8Z,11Z,14Z-eicosatetraenoic acid]	Oxidized lipid	357.05	192.94	146.21	65.36	185.81	120.1	213.42	158.93	90.08	196.21	107.04	90.1	0.438902	0.80169	-0.318884	insig
MEDN779	5-HETrE [5S-hydroxy-6E,8Z,11Z-eicosatrienoic acid]	Oxidized lipid	157.51	72.08	386.84	27.84	100.79	222.48	104.52	130.17	3122.3	178.29	128.74	22.86	0.351891	3.81057	1.93001	insig
MEDN782	8,9-EET [(±)8,9-epoxy-5Z,11Z,14Z-eicosatrienoic acid]	Oxidized lipid	317.5	193.3	167.43	266.7	166.66	300.51	200.2	267.55	209.15	317.62	233.9	100.12	0.351671	0.940826	-0.0880006	insig
MEDN783	9,10-EpOME [(±)9,10-epoxy-12Z-octadecenoic acid]	Oxidized lipid	60855	49353	58344	53837	61302	55759	51619	58628	78571	47485	60861	52589	0.191576	1.03035	0.0431373	insig
MEDN784	9-oxoODE [9-oxo-10E,12Z-octadecadienoic acid]	Oxidized lipid	137200	131290	127430	130230	120830	130230	139520	144420	142150	122130	138360	125250	0.917607	1.04454	0.0628732	insig
MEDN795	PGF2α [9α,11α,15S-trihydroxy-prosta-5Z,13E-dien-1-oic acid]	Oxidized lipid	341.11	349.65	858.63	298.91	454.41	383.98	605.79	559.02	806.39	421.26	226.04	483.77	0.485783	1.15468	0.207494	insig
MEDN804	TxB3 [9α,11,15S-trihydroxythromba-5Z,13E,17Z-trien-1-oic acid]	Oxidized lipid	704.26	932.04	355.37	260.9	586.74	512.65	165.62	812.8	239.67	183.89	494.47	372.29	1.06113	0.67684	-0.563114	insig
MEDN807	Myristic acid	Fatty acyls	65.49	136.14	444.67	161.86	93.12	139.87	423.42	567.22	155.41	414.49	73.92	94.93	0.722935	1.66104	0.732085	insig
MEDN808	Myoinositol	Carbohydrate metabolomics	1949100	1668500	2559800	1865600	2279700	1378400	1702500	1718300	3475500	2562900	1251200	1909800	0.20743	1.07855	0.109091	insig
MEDN811	Pelargonate (9:0)	Fatty Acyls	5365.1	6824.9	6028.9	4635.9	6664.4	5513.5	7151	6605.2	4633.4	5038.6	6452.2	5388	0.0093763	1.00673	0.00967395	insig
MEDN849	Cortisol 21-Acetate	Lipids	2593400	1993100	3727800	11668000	10108000	16026000	1475400	3375600	5601000	2219200	3021500	2717400	1.23347	0.39921	-1.32478	down
MEDP002	D-Homocysteine	Amino Acid metabolomics	611030	732060	682610	610020	762420	487340	1249600	934160	310780	1231600	780650	939880	0.875469	1.4018	0.487282	insig
MEDP006	Glycine	Amino Acid metabolomics	3484900	3505900	3014200	2955600	803050	8984700	1762600	3979200	2808300	3141000	6360000	5654300	0.37119	1.04207	0.0594538	insig
MEDP007	L-Cystine	Amino Acid metabolomics	764850	926090	585950	851550	575310	826080	806060	473130	659100	693390	513630	432820	1.31969	0.789904	-0.340251	insig
MEDP009	L-Tyrosine	Amino Acid metabolomics	38890000	41433000	40137000	46313000	41612000	46557000	59005000	50432000	44854000	48006000	46395000	42164000	1.43462	1.14087	0.190136	insig
MEDP011	L-Lysine	Amino Acid metabolomics	9223400	13494000	13734000	15819000	13241000	20988000	18030000	17518000	15133000	13682000	13352000	18002000	0.748893	1.10656	0.146085	insig
MEDP012	L-Ornithine	Amino Acid metabolomics	918350	1066000	954590	2133800	355750	1015900	482400	1196000	602870	556190	625770	983240	0.809313	0.689975	-0.535383	insig
MEDP013	L-Alanine	Amino Acid metabolomics	55691000	62158000	72533000	54412000	57360000	66300000	70322000	70826000	65519000	75391000	68059000	81782000	1.70736	1.17219	0.229209	insig
MEDP014	L-Aspartic Acid	Amino Acid metabolomics	1483600	810460	750640	653920	1385000	2190000	664430	2623100	2054100	891480	923650	812010	0.132857	1.09557	0.131684	insig
MEDP019	L-Leucine	Amino Acid metabolomics	138600000	187570000	167720000	159660000	176020000	206860000	244670000	202890000	218590000	214290000	186780000	197850000	1.70826	1.2206	0.287595	insig
MEDP020	L-Methionine	Amino Acid metabolomics	2457600	4227300	3883200	2488400	3765700	4112600	6675000	3046200	6272300	4538900	2798800	3396800	0.839935	1.27673	0.352449	insig
MEDP021	L-Phenylalanine	Amino Acid metabolomics	183000000	212800000	203890000	183870000	200370000	214950000	251660000	207470000	244420000	227270000	202970000	217510000	1.58291	1.12714	0.172661	insig
MEDP022	L-Proline	Amino Acid metabolomics	20743000	26005000	34494000	32169000	28554000	42003000	31864000	35611000	31828000	28912000	32607000	35813000	0.641751	1.06885	0.0960653	insig
MEDP026	L-Valine	Amino Acid metabolomics	35931000	45893000	47881000	28046000	35060000	48065000	64184000	53328000	44940000	61285000	56768000	54559000	1.81403	1.39102	0.476146	insig
MEDP031	3-Chloro-L-Tyrosine	Amino Acid metabolomics	235280	370250	275960	216850	478180	337200	392380	209630	328270	331420	196660	343360	0.255676	0.941475	-0.0870049	insig
MEDP034	3-N-Methyl-L-Histidine	Amino Acid metabolomics	26356000	22524000	28666000	19175000	24108000	14111000	21144000	15770000	29367000	17646000	19773000	15953000	0.645384	0.886713	-0.173461	insig
MEDP036	5-Oxoproline	Amino Acid metabolomics	3396500	3455700	5973500	5392500	1062900	3712900	1502900	5092000	1819100	1950400	2196400	2620600	0.902898	0.660233	-0.598953	insig
MEDP037	Aspartic acid-Phenylalanine	Amino Acid metabolomics	833450	1364000	1201000	1029400	1190500	1904400	1781300	1239300	1877500	1329300	871740	932870	0.235033	1.0677	0.0945009	insig
MEDP039	Betaine	Alkaloid	206740000	147510000	169670000	200600000	159590000	173000000	206140000	215610000	192690000	164890000	210990000	210350000	1.31838	1.1358	0.183714	insig
MEDP047	Histamine	Polyamine	584220	602830	742130	761080	667620	1034200	582070	871810	500630	764780	687190	815680	0.244711	0.961312	-0.0569231	insig
MEDP051	L-Cystathionine	Amino Acid metabolomics	93373	109110	247390	95039	64844	131240	136210	1061200	747200	527590	2166000	859490	2.0347	7.41932	2.89129	up
MEDP055	L-Homocitrulline	Amino Acid metabolomics	154570	121100	325550	313700	192010	173160	291430	286660	421330	300060	181910	142440	0.794082	1.26853	0.343155	insig
MEDP056	L-Homocystine	Amino Acid metabolomics	51235	59996	254280	62116	61506	95551	162610	103200	81518	61874	88491	76419	0.314057	0.981918	-0.0263249	insig
MEDP060	Methionine Sulfoxide	Amino Acid metabolomics	7942900	7057000	6128600	7223100	7242800	4042200	8013800	7300800	6872800	7088500	6711000	7638800	0.857253	1.10064	0.138345	insig
MEDP061	N,N-Dimethylglycine	Amino Acid metabolomics	2716000	1120400	672230	1206600	1027200	1107300	784760	1009200	819990	790320	747670	822150	1.28894	0.633664	-0.65821	insig
MEDP062	N6-Acetyl-L-Lysine	Amino Acid metabolomics	209190	188150	279900	271270	201220	287390	243170	313510	315130	281430	261180	457020	1.44157	1.30222	0.380968	insig
MEDP069	N-Acetylputrescine	Organic Acid And Its Derivatives	121570	117590	125810	104710	118310	154000	100830	127780	137540	117730	126760	127380	0.0249505	0.99465	-0.00773983	insig
MEDP072	N-Isovaleroylglycine	Amino Acid metabolomics	4727	4169.1	4689.9	4325	5654.6	8398.9	16844	19661	3866.6	5337.4	33373	18781	1.55852	3.06162	1.61429	up
MEDP075	Nα-Acetyl-L-Arginine	Amino Acid metabolomics	294460	319590	358110	245830	245960	424040	181130	290220	179150	271980	478180	381570	0.429334	0.943983	-0.0831676	insig
MEDP078	Phenylalanine-Phenylalanine	Amino Acid metabolomics	94021	102800	118590	111860	124720	118770	103700	109580	100330	90459	89277	99745	1.45391	0.884206	-0.177545	insig
MEDP081	Serotonin	Indole And Its Derivatives	1931.1	2742.7	3851.3	821.24	745.5	2865.9	1846.6	2501.5	2781.4	1136.5	4758.4	3821.4	0.728483	1.30006	0.378575	insig
MEDP082	S-Sulfo-L-Cysteine	Amino Acid metabolomics	14650	9224.5	9880.3	110480	47865	88285	23498	26687	32286	18060	33143	27645	0.185959	0.575349	-0.797492	insig
MEDP083	Trans-4-Hydroxy-L-Proline	Amino Acid metabolomics	139920000	195670000	170880000	164030000	185260000	209420000	246500000	207970000	220680000	218710000	189950000	203830000	1.66039	1.20885	0.273632	insig
MEDP084	Trimethylamine N-Oxide	Amino Acid metabolomics	296590	638410	734400	1128600	683160	1492600	507290	405060	636750	1000500	1696300	2449900	0.443094	1.34622	0.42892	insig
MEDP085	Tyramine	Benzene and substituted derivatives	2847.6	3241.6	2846.2	6671.5	7151.4	5402	1752.8	4557.4	4195.9	12161	2074.6	2002.7	0.515642	0.94972	-0.0744259	insig
MEDP086	Urea	Amino Acid metabolomics	9418400	10141000	11345000	12413000	6317500	14438000	9694100	10459000	10872000	10594000	16535000	17209000	0.808801	1.17621	0.234144	insig
MEDP087	L-Alanyl-L-Lysine	Amino Acid metabolomics	2382500	6188500	6828200	7547600	1496100	10691000	5021100	12614000	3524900	5668700	6317500	10038000	0.662293	1.22913	0.29764	insig
MEDP101	P-Coumaric Acid	Benzene and substituted derivatives	1432300	1544800	1666800	1770900	1715400	1873200	2441600	1972500	1758000	1920600	1626700	1525700	0.975929	1.12413	0.168806	insig
MEDP106	Benzoic Acid	Benzene and substituted derivatives	128680	127490	82653	174660	204350	169990	274640	207680	269510	295970	154600	219150	1.71561	1.60116	0.679121	insig
MEDP107	Methyl Benzoate	Benzene and substituted derivatives	83752	70002	114130	79693	64636	212710	56701	106570	156550	578530	60797	208370	0.735666	1.86826	0.901694	insig
MEDP112	4-Ethylbenzoic Acid	Benzene and substituted derivatives	108940	119430	105430	118180	109400	117160	120790	135230	116350	116950	117590	148340	1.48258	1.11305	0.15452	insig
MEDP115	1,4-Dihydro-1-Methyl-4-Oxo-3-Pyridinecarboxamide	Pyridine And Pyridine Derivatives	80737	78053	68561	108180	57746	210500	90473	134150	150310	123960	127630	104080	0.98847	1.21005	0.275072	insig
MEDP118	4-Pyridoxic Acid	Pyridine And Pyridine Derivatives	62026	138670	21652	33471	25915	36685	59087	403810	276520	50989	9	79050	0.237439	2.73057	1.4492	insig
MEDP123	Acetylcholine Chloride	Cholines	1716500	1518700	2176600	1731200	1645500	1738500	1864900	3468000	1612000	2462100	3856200	3242700	1.62673	1.56796	0.648887	insig
MEDP125	Choline	Cholines	54065	47468	74118	54735	128740	82096	94429	48633	62188	56751	27824	52735	0.86457	0.776389	-0.365148	insig
MEDP128	Diethanolamine	Polyamine	103540	376320	436280	368890	88601	497900	215460	562460	338130	124680	277900	338390	0.189821	0.992246	-0.0112296	insig
MEDP130	4-Nitrophenol	Phenols And Its Derivatives	16809000	14870000	14221000	17473000	14122000	16662000	17892000	16705000	17733000	16309000	15464000	18823000	1.29792	1.09313	0.128467	insig
MEDP133	Enterodiol	Phenols And Its Derivatives	8386.7	3051	4174.4	5729.8	3994.2	2977.9	9	1033.6	3856.4	9	1858.4	9	1.69084	0.239295	-2.06314	down
MEDP134	Inositol	Carbohydrate metabolomics	11030000	9257600	10811000	12944000	8937400	8828900	12448000	11274000	12574000	14203000	12753000	14579000	1.81417	1.25922	0.33253	insig
MEDP147	1-Methylhistidine	Amino Acid metabolomics	1886100	4952400	3898700	5643500	2490900	3287500	5612400	3461600	6608200	6184400	2375800	1981300	0.359847	1.18343	0.242972	insig
MEDP149	2'-Deoxyadenosine-5'-Monophosphate	Nucleotide metabolomics	2653.6	10079	14720	5415.2	8700.9	4392.5	43132	14766	7825.2	2821.6	7000.5	9623.2	0.683808	1.85305	0.889903	insig
MEDP150	2'-Deoxyinosine	Nucleotide metabolomics	13975	6258.7	8654.3	11320	7932.6	19879	6828.2	19001	18577	2327.5	16562	31604	0.261467	1.39518	0.480453	insig
MEDP151	2-Hydroxy-6-Aminopurine	Nucleotide metabolomics	289730	319230	382560	239260	186200	457070	359590	358890	360730	542680	291680	372190	1.03539	1.21969	0.286514	insig
MEDP155	5-Methylcytosine	Nucleotide metabolomics	887200	770800	506330	562130	662350	374020	672790	336430	993660	483580	363730	403090	0.668036	0.864583	-0.209923	insig
MEDP156	5-Methyluridine	Nucleotide metabolomics	23325	19019	17416	17520	25787	20983	30361	22213	29944	39545	13219	18370	0.705685	1.23863	0.308745	insig
MEDP159	Adenine	Nucleotide metabolomics	498340	528800	487610	592190	611620	617610	759010	929960	734110	669970	593390	669680	1.848	1.30572	0.384851	insig
MEDP161	Adenosine 5'-Diphosphate	Nucleotide metabolomics	372820	314440	206220	373490	627780	277360	672470	1369100	810770	318030	198840	685420	1.13226	1.86668	0.900473	insig
MEDP163	Cytidine	Nucleotide metabolomics	1237500	2276500	2350700	1562100	1979400	6548300	1950900	3554600	1899200	2427400	2115200	2036200	0.00149935	0.876461	-0.190238	insig
MEDP166	Deoxyguanosine	Nucleotide metabolomics	254900	363840	156510	200800	183200	280440	223710	283940	298900	389040	233700	235880	0.815982	1.15662	0.209911	insig
MEDP167	Guanosine	Nucleotide metabolomics	5879800	8211400	5116500	5967900	5974400	14985000	7682600	11621000	10761000	13410000	7514500	9036500	1.17451	1.30109	0.379716	insig
MEDP170	Hypoxanthine	Nucleotide metabolomics	21229000	26020000	21224000	25494000	30256000	53327000	19706000	39347000	32710000	29172000	22638000	39736000	0.248255	1.03244	0.0460523	insig
MEDP171	Inosine	Nucleotide metabolomics	316050000	348530000	284390000	258690000	285050000	337810000	325810000	401790000	352020000	429060000	372720000	346440000	1.77257	1.21705	0.283392	insig
MEDP176	Thymidine	Nucleotide metabolomics	121200	50446	47711	76465	130600	89330	119210	120460	175520	167700	110770	140220	1.68257	1.61682	0.693162	insig
MEDP178	Uracil	Nucleotide metabolomics	492280	948980	623920	568300	852710	2021500	462170	986000	736830	855310	554220	578520	0.613914	0.757677	-0.400345	insig
MEDP179	Uridine	Nucleotide metabolomics	1720300	2972300	1825500	1628400	2310400	4690900	1688000	3585200	2628600	3635100	2164800	2026200	0.264457	1.0383	0.0542178	insig
MEDP184	3,3',5-Triiodo-L-Thyronine	Hormones	7426.7	3771	4587.6	5061.3	8089	5636.7	4671.4	3932.1	4668.8	6358.8	4663.9	5750.6	0.637493	0.869066	-0.202463	insig
MEDP185	Epinephrine	Hormones	9	163020	9	9	9	9	9	468990	300760	9	9	9	0.535212	4.72073	2.23901	insig
MEDP186	L-Thyroxine	Hormones	15050	15180	13055	24106	35015	33729	15607	40582	22244	28290	16998	14989	0.0935741	1.01892	0.0270338	insig
MEDP205	L-Carnitine	Camitine	192200000	177330000	172940000	140690000	149670000	148580000	171870000	194730000	221020000	206740000	180870000	178170000	1.59361	1.17525	0.232965	insig
MEDP215	Quinine	Alkaloid	9	1654.8	9	8745.9	9	9	9	9	9	9	9	9	1.11794	0.00517405	-7.59449	down
MEDP218	D-Mannitol	Carbohydrate metabolomics	281400	245800	240720	260510	220570	253780	226720	271410	221380	187690	189620	216500	1.41356	0.873927	-0.194415	insig
MEDP221	Ribitol	Carbohydrate metabolomics	1229800	1233500	1075600	1093200	1215100	1157500	581160	617520	679790	557650	640080	561750	2.46705	0.519358	-0.945198	insig
MEDP224	D-Fructose	Carbohydrate metabolomics	91887000	78123000	94274000	119120000	80112000	77915000	98543000	88557000	100200000	114080000	98147000	112740000	1.19561	1.13083	0.177383	insig
MEDP229	Lactose	Carbohydrate metabolomics	2929.9	2087.9	4413.1	14182	5264.1	1809.2	1447	3363.4	3343.1	3430.9	10309	4209.2	0.127253	0.85063	-0.233396	insig
MEDP233	Raffinose	Carbohydrate metabolomics	2508.5	1464.3	2769.2	1836.9	2066.2	4942.4	3139.5	1757.6	1887.2	1554	4055.6	1653.6	0.344015	0.901203	-0.150076	insig
MEDP234	D-Glucono-1,5-Lactone	Carbohydrate metabolomics	472480	456210	561410	502480	481410	516660	487930	542480	550500	504200	529110	592930	1.21571	1.07239	0.100833	insig
MEDP239	L-Ascorbate	CoOthersEnzyme Factor & vitamin	991790	991660	1453100	1569300	528340	1907000	825750	1528000	1110900	874490	1653600	1770300	0.269401	1.04325	0.0610884	insig
MEDP242	Nicotinamide	CoOthersEnzyme Factor & vitamin	310950000	297360000	281710000	280690000	305460000	259300000	330580000	311120000	297500000	295160000	315490000	324200000	1.50916	1.07985	0.110833	insig
MEDP246	Nicotinic Acid	CoOthersEnzyme Factor & vitamin	266650	380700	542200	298580	541060	442330	379460	426030	398410	401870	385770	407820	0.0394278	0.970803	-0.0427489	insig
MEDP249	Pantothenol	CoOthersEnzyme Factor & vitamin	27491	13892	22579	18790	41065	13074	24588	20534	32363	20193	30825	19262	0.529359	1.07944	0.110277	insig
MEDP250	Riboflavin	CoOthersEnzyme Factor & vitamin	649010	512380	360410	457420	391820	478350	412130	612430	674470	507200	315110	394320	0.0476621	1.02326	0.0331694	insig
MEDP251	Trigonelline	CoOthersEnzyme Factor & vitamin	264120	39835	159350	373230	280100	106920	94353	108020	98573	106450	808300	1679100	0.455937	2.36589	1.24238	insig
MEDP270	3-Indolebutyric Acid	Indole And Its Derivatives	6301.2	3862	3227.3	1361.2	3976.4	7405.4	9	2960.8	873.8	3189.9	3422.8	2315.3	1.03132	0.488706	-1.03296	down
MEDP271	3-Indolepropionic Acid	Indole And Its Derivatives	9	4327.8	7222.1	18888	9962.9	15295	29550	2351.4	62046	15531	13249	2273	0.731682	2.24398	1.16606	insig
MEDP274	Indole-2-Carboxylic Acid	Indole And Its Derivatives	1830.2	5993.8	1691.2	1203.1	1901.3	1802.9	1170.1	1280.4	2125.1	3165.5	1289.5	1743.4	0.567493	0.747027	-0.420767	insig
MEDP275	Indole-3-Acetic Acid	Indole And Its Derivatives	1888000	2404200	1862500	2203400	2480100	2916600	2955500	1785200	1883200	2049900	2015300	2102900	0.596082	0.930003	-0.104693	insig
MEDP277	Methyl Indole-3-Acetate	Indole And Its Derivatives	3725.2	3353.2	4435	3827.6	3592	4191.8	1509.7	4809.3	4271.7	6350	10033	1938.6	0.0702999	1.25027	0.322242	insig
MEDP285	2,6-Diaminooimelic Acid	Organic Acid And Its Derivatives	70580	114270	160680	102480	63334	71072	109110	161660	119440	125200	153620	126310	1.45586	1.36559	0.449522	insig
MEDP289	3,4,5-Trimethoxycinnamic Acid	Organic Acid And Its Derivatives	2068.6	1613.5	1443.6	1763.3	1361.8	2384.3	5698.5	9288.3	1299.9	1509.3	3369.8	2230.9	1.17912	2.19995	1.13747	up
MEDP294	3-Methylcrotonyl Glycine	Organic Acid And Its Derivatives	15909	66725	75684	79606	17085	3417.1	9319.5	32125	143890	53143	123900	124260	0.864724	1.88308	0.913096	insig
MEDP295	4-Acetamidobutyric Acid	Organic Acid And Its Derivatives	71411	62850	10280	70149	86588	85032	81726	13541	169480	49911	10383	9016.5	0.718612	0.864739	-0.209663	insig
MEDP296	4-Guanidinobutyric Acid	Organic Acid And Its Derivatives	34393000	28393000	41993000	34022000	31204000	30758000	34947000	62666000	29151000	46372000	73705000	62011000	1.53971	1.53839	0.621422	insig
MEDP297	5-Aminovaleric Acid	Organic Acid And Its Derivatives	764660	2225900	2499400	2634100	438050	2535000	765110	6344200	1729900	1674300	5155500	5889800	0.929718	1.94274	0.958094	insig
MEDP298	6-Aminocaproic Acid	Organic Acid And Its Derivatives	11273000	18080000	14080000	13416000	15556000	17564000	24464000	18915000	18890000	19534000	15317000	16992000	1.53075	1.26835	0.342951	insig
MEDP299	7-Methyluric Acid	Organic Acid And Its Derivatives	4748800	3795700	3862800	3450100	3937000	4416100	4243800	4511200	4369500	4136700	4692200	4260700	1.17492	1.08276	0.11471	insig
MEDP305	Creatinine	Organic Acid And Its Derivatives	6755200	7412000	7820800	6083400	6973300	7237700	8285800	6727800	7097700	7552800	8301300	8643000	1.23856	1.10231	0.140533	insig
MEDP307	DL-2-Aminooctanoic Acid	Organic Acid And Its Derivatives	145420	174320	81239	114660	101800	222280	168120	228690	185070	263020	74359	172560	0.808622	1.30022	0.378755	insig
MEDP310	D-Pipecolinic Acid	Organic Acid And Its Derivatives	2279200	2442400	5074900	4256500	575780	2864600	1503300	4916000	1460000	1858100	1877300	2224400	0.308237	0.791105	-0.338059	insig
MEDP313	Guanidineacetic Acid	Organic Acid And Its Derivatives	795790	2169300	2513700	2558500	444830	2406000	729130	6448900	1787900	1581800	5182300	5761500	0.926334	1.97385	0.981013	insig
MEDP322	L-Homoserine	Organic Acid And Its Derivatives	714380	1307500	1938700	1289500	1084900	2569400	2146500	2063800	1615000	1626400	2262700	3015600	1.35226	1.42963	0.515645	insig
MEDP325	Maleic Acid	Organic Acid And Its Derivatives	1037500	1227800	1649900	1623900	1556900	1988900	1581100	1675500	1502600	1306700	1376300	1700200	0.176222	1.00633	0.00910231	insig
MEDP326	N'-Formylkynurenine	Organic Acid And Its Derivatives	306570	350150	304480	283290	359270	375090	543790	295350	303860	370730	324740	367890	0.666444	1.11497	0.157006	insig
MEDP332	Cinnamic Acid	Organic Acid And Its Derivatives	1683700	2197400	2026200	1736000	1968700	2181000	3351600	2000800	3202200	2670100	2035200	2391200	1.6018	1.32715	0.408333	insig
MEDP336	Lysopc 14:0	LipidsOthersPhospholipid	557970	486010	189760	371000	283050	218460	222800	412640	830290	354740	366020	294770	0.475324	1.17805	0.236396	insig
MEDP338	Lysopc 16:0	LipidsOthersPhospholipid	67295000	76949000	26887000	58818000	44532000	34526000	39533000	60539000	100570000	51119000	47586000	46380000	0.474767	1.11883	0.161994	insig
MEDP340	Lysopc 16:1	LipidsOthersPhospholipid	610630	674210	327870	672590	493740	63410	297800	452350	1764800	965110	535770	782140	0.974261	1.68797	0.755289	insig
MEDP342	Lysopc 18:0	LipidsOthersPhospholipid	26529000	34015000	9958200	28504000	16373000	11659000	14893000	24822000	55789000	26126000	15776000	16626000	0.47987	1.21249	0.277968	insig
MEDP344	Lysopc 18:1	LipidsOthersPhospholipid	16196000	13878000	6831400	15540000	13001000	17172000	9764000	20209000	20234000	15439000	11599000	13650000	0.439045	1.10018	0.137738	insig
MEDP346	Lysopc 18:2	LipidsOthersPhospholipid	1407300	1853900	746980	1325600	1015800	1562500	750980	1417300	4139300	2298200	1227900	3001100	0.961998	1.62218	0.69793	insig
MEDP350	Lysopc 20:1	LipidsOthersPhospholipid	56549	88490	9	49006	55978	36890	55354	73430	183050	72906	30198	27151	0.772099	1.5408	0.623678	insig
MEDP352	Lysopc 20:2	LipidsOthersPhospholipid	13467	24416	10203	25930	13264	3101.5	16943	13206	42681	12537	13204	26286	0.836791	1.38144	0.466177	insig
MEDP357	Urocanic Acid	Organic Acid And Its Derivatives	474390	583170	614320	560270	552140	499210	734520	716460	322560	734750	537340	764400	0.607624	1.16036	0.214568	insig
MEDP368	Taurocholic Acid Sodium Salt Hydrate	Organic Acid And Its Derivatives	4584200	4359300	4378900	4445200	4555000	4236000	4579300	4116800	4286800	4551100	4285000	4217400	0.739736	0.980338	-0.0286491	insig
MEDP372	Uridine 5-Monophosphate	Nucleotide metabolomics	6873600	5878500	5215300	7007500	7624000	3730900	6654400	6355200	9075000	7190500	6898000	6766600	1.12854	1.18194	0.241159	insig
MEDP373	N-Acetylglycine	Amino Acid metabolomics	79564000	39883000	48781000	71365000	53010000	49716000	91537000	107970000	75119000	77903000	88255000	93923000	1.9673	1.56201	0.643407	insig
MEDP380	2-(Dimethylamino)Guanosine	Nucleotide metabolomics	328160	239310	223460	314160	302290	343980	329490	362360	511850	307390	314310	371400	1.40703	1.25434	0.326928	insig
MEDP381	7-Methylguanine	Nucleotide metabolomics	43380000	55650000	52026000	42038000	49194000	54930000	88017000	54716000	82831000	70332000	54426000	63296000	1.80284	1.39163	0.476777	insig
MEDP386	N-Acetylthreonine	Amino Acid metabolomics	5983.9	9186.5	34590	34705	35603	8496.9	10844	27769	38265	5833.2	3802.6	84923	0.0516087	1.33346	0.415176	insig
MEDP387	H-Homoarg-Oh	Amino Acid metabolomics	180310	110900	159900	263490	67696	325910	68526	102590	90434	96690	126080	217910	1.00925	0.633664	-0.658211	insig
MEDP389	Pantetheine	CoOthersEnzyme Factor & vitamin	39166000	40141000	39971000	42128000	41342000	40570000	40973000	40903000	39909000	38378000	39870000	40504000	0.616184	0.988571	-0.0165842	insig
MEDP390	Hypoxanthine-9-β-D-Arabinofuranoside	Nucleotide metabolomics	323110000	357900000	290980000	261300000	293990000	343760000	303270000	384010000	338300000	422290000	318430000	318240000	1.07979	1.11411	0.155889	insig
MEDP395	L-Pipecolic Acid	Amino Acid metabolomics	321300	493320	451210	402350	224830	395810	207470	699840	354450	330940	287320	276460	0.40571	0.94218	-0.0859257	insig
MEDP401	5'-Deoxy-5'-(Methylthio) Adenosine	Nucleotide metabolomics	12709000	11444000	8565700	10444000	7357600	13042000	10256000	24851000	19393000	17878000	16798000	35013000	1.82452	1.95382	0.966294	insig
MEDP403	2'-Deoxycytidine	Nucleotide metabolomics	255280	162390	108900	95266	110000	148780	124300	191190	203270	192230	161940	236230	1.13574	1.25953	0.332883	insig
MEDP404	Sarcosine	Amino Acid metabolomics	1484000	1329600	1486100	1638500	1531400	1258700	1456000	1616000	1445000	1383000	1407800	1467000	0.154098	1.00533	0.00766555	insig
MEDP405	3-Aminoisobutanoic Acid	Amino Acid metabolomics	144660	89317	96775	114510	115820	73019	73488	148260	93435	111420	77994	81544	0.44416	0.924365	-0.113465	insig
MEDP410	Trans-Citridic Acid	Organic Acid And Its Derivatives	184770	176940	172740	188970	165030	171000	129990	119840	129270	132040	130770	130830	2.43494	0.729378	-0.455261	insig
MEDP423	Phosphoric Acid	Organic Acid And Its Derivatives	307570000	356660000	343020000	270850000	353960000	348970000	362490000	378980000	331250000	345170000	347190000	318540000	0.774491	1.05179	0.0728415	insig
MEDP428	Cholesterol	Lipids	4079700	71586000	43248000	100780000	4250500	49185000	61421000	3693300	4233300	1801900	1890100	31256000	1.11206	0.381854	-1.38891	down
MEDP429	Punicic Acid	Lipids_Fatty Acids	2222900	2159700	2151700	2588400	2356800	2224600	1674200	1885900	1940700	2036700	1867100	1929300	2.0913	0.827044	-0.273963	insig
MEDP430	2-Aminoadipic Acid	Organic Acid And Its Derivatives	1636700	6113300	3431900	2922500	2627000	8899500	1307300	6129400	11465000	4978700	1672100	3364000	0.0364194	1.12819	0.174009	insig
MEDP431	Hordenine	Benzene and substituted derivatives	101510	158720	126980	114880	136410	155550	220000	129180	212030	183680	139920	166520	1.51115	1.32401	0.404914	insig
MEDP434	Lysopc 17:0	LipidsOthersPhospholipid	3328800	3341900	1076800	3034500	1866800	1354200	1483100	2572800	4344700	2363200	1511900	1616400	0.0274295	0.99208	-0.0114712	insig
MEDP435	6-Methylmercaptopurine	Nucleotide metabolomics	162710000	161520000	167420000	165880000	166230000	162490000	175130000	174350000	176880000	174410000	171280000	173980000	2.3383	1.06061	0.0848989	insig
MEDP437	Ergothioneine	Organic Acid And Its Derivatives	193680	110720	170420	251330	149600	158080	117830	177340	125000	143900	196080	135050	0.71491	0.865906	-0.207717	insig
MEDP438	N-Formylmethionine	Amino Acid metabolomics	1461.6	729.46	2223.1	1179.8	2552.2	719.52	1346.7	773.06	1055.1	1069.3	968.7	2627.3	0.224009	0.884327	-0.177348	insig
MEDP440	Methoxyindoleacetic Acid	Indole And Its Derivatives	119850	135650	104000	145770	122460	154950	158190	91380	92112	114100	97091	116500	1.15591	0.855232	-0.225612	insig
MEDP442	Sn-Glycero-3-Phosphocholine	Cholines	8205500	34892000	7842300	4689200	17208000	5270700	11704000	5070000	18163000	7012400	5059400	6537200	0.467585	0.685541	-0.544686	insig
MEDP450	P-Aminobenzoate	Benzene and substituted derivatives	16101000	9612100	9499600	14050000	11320000	23812000	10327000	17971000	16231000	18803000	13506000	14969000	0.555572	1.08783	0.121452	insig
MEDP453	Indole	Indole And Its Derivatives	2676500	2828400	2818800	2769900	2762000	2787500	2989200	2897400	2830400	3037800	2946600	2910800	2.02049	1.05823	0.081651	insig
MEDP454	Isoquinoline	Benzene and substituted derivatives	1594.2	1791.3	3923.3	2129.1	1066	9289.9	1690.5	3562.1	4186.4	3490.7	1248.2	1115.3	0.231636	0.772626	-0.372158	insig
MEDP456	Piperidine	Benzene and substituted derivatives	1641200	2826800	2102800	2101600	2299900	2818400	3742900	2682200	2757400	3004700	2323500	2582500	1.34822	1.23947	0.309727	insig
MEDP457	5-Aminolevulinate	Organic Acid And Its Derivatives	239890	354010	263110	292670	332290	353100	578320	404260	402780	442090	335420	374630	1.76301	1.38278	0.467573	insig
MEDP494	Lysopc 15:0	LipidsOthersPhospholipid	1769400	2080700	655600	1475700	990680	967090	795220	1489700	2697500	1525900	1094800	1209600	0.353813	1.11003	0.150599	insig
MEDP495	Lysope 18:2 (2N Isomer)	Lipids_Fatty Acids	2893.7	2217.9	753.39	3071.2	1640.5	54813	1523.9	4829	1336.5	2755.8	1906.1	1802.3	0.558497	0.21645	-2.20789	insig
MEDP498	Lysopc 18:3	LipidsOthersPhospholipid	23869000	26685000	8761300	19642000	14568000	11290000	12388000	20132000	35771000	16302000	15594000	15297000	0.374467	1.10179	0.139844	insig
MEDP507	2-Hydroxycinnamic acid	Benzene and substituted derivatives	9130300	9678000	9537300	11161000	10275000	10718000	14272000	11169000	10345000	11475000	10440000	9633500	1.09395	1.11297	0.15442	insig
MEDP509	trans-3-Indoleacrylic acid	Organic Acid And Its Derivatives	437670	454510	307030	480780	432930	475930	549810	290170	341380	398350	342540	398640	0.81783	0.896495	-0.157633	insig
MEDP510	Acetyl-L-carnitine	Camitine	519840000	555330000	436420000	558980000	508930000	476550000	497250000	545570000	515560000	416270000	454620000	424050000	0.893743	0.933663	-0.0990266	insig
MEDP511	Jasmonic acid	Lipids_Fatty Acids	58273	38335	74552	48651	36807	63751	86096	46345	27737	65389	83821	76494	0.533387	1.20449	0.268425	insig
MEDP513	Hexadecanamide	Lipids_Fatty Acids	16440000	8989800	12674000	9141600	12492000	16113000	12953000	15776000	18960000	10908000	18738000	18715000	1.20404	1.26631	0.340629	insig
MEDP514	Thiamine	CoOthersEnzyme Factor & vitamin	107350	111210	27805	183000	24959	108770	23175	72102	92658	96490	52391	106980	0.202661	0.788138	-0.343479	insig
MEDP518	DL-Stachydrine	Organic Acid And Its Derivatives	1610800	2091200	2130300	1603600	1314100	1793000	1173700	1937700	1638300	868740	1572600	1291200	1.19581	0.804538	-0.313768	insig
MEDP519	L-Norleucine	Amino Acid metabolomics	367280	1718300	1484800	1246100	1809600	1783900	655340	47513	1701900	1122300	1586600	1672100	0.65597	0.806869	-0.309593	insig
MEDP523	DL-Carnitine	Camitine	255700000	253240000	254240000	237060000	247830000	243270000	258620000	261170000	273160000	273480000	250460000	252810000	1.60503	1.05254	0.0738797	insig
MEDP525	N-Acetyl-L-alanine	Organic Acid And Its Derivatives	342640000	330540000	328870000	321650000	322250000	259590000	357620000	339410000	346200000	354140000	339510000	338430000	1.4112	1.08909	0.123127	insig
MEDP529	Indole-3-acetamide	Indole And Its Derivatives	33609	2920.3	3055.3	55296	6351.8	7175.9	2973.3	63069	85909	27793	4806.9	1921.2	0.267498	1.72009	0.782487	insig
MEDP530	15-Deoxy-δ-12,14-PGJ2	Lipids_Fatty Acids	1025100	1012400	977830	1252100	1128000	1074500	1082200	1225100	1295300	1276500	1133200	1193100	1.50792	1.11368	0.155328	insig
MEDP535	Triethyl phosphate	Organic Acid And Its Derivatives	279860	226410	303660	250180	306280	243390	281650	229800	296150	307370	315500	306310	0.838236	1.07889	0.109551	insig
MEDP537	PAF C-16	Lipids	28621000	36848000	10975000	30840000	17617000	13057000	15711000	26945000	59321000	27306000	17134000	17980000	0.435823	1.19165	0.252955	insig
MEDP541	δ-Valerolactam	Pyridine And Pyridine Derivatives	13322	216150	10160	41398	35958	9069.8	183210	336190	17325	4136.9	6857.2	19517	0.0529061	1.73968	0.798822	insig
MEDP545	2-Pyrrolidinone	Benzene and substituted derivatives	1282700	2217800	1801200	1643400	1859000	2202800	2917200	2060400	2233200	2299100	1909200	2145100	1.37818	1.23234	0.301396	insig
MEDP574	Oleamide	Lipids_Fatty Acids	31889000	13908000	23244000	13497000	20352000	26484000	19570000	25131000	31061000	17112000	34128000	32706000	0.927134	1.23447	0.303889	insig
MEDP575	5-amino-1-[3,4-dihydroxy-5-(hydroxymethyl)oxolan-2-yl]imidazole-4-carboxamide	Nucleotide metabolomics	6563.4	6655.4	7844.1	8605.7	37388	11197	1918.4	6096.1	7115.1	4907.6	5622	1369.9	1.59158	0.345404	-1.53364	down
MEDP577	Isobutyryl carnitine	Camitine	201200000	237670000	263200000	243070000	172620000	195660000	243170000	192850000	162620000	193360000	222230000	263110000	0.241468	0.97253	-0.0401857	insig
MEDP583	Aspartame	Organic Acid And Its Derivatives	116490	101020	106030	172540	331270	210080	262340	219010	186900	204710	209560	113380	0.684955	1.15275	0.205083	insig
MEDP584	Pterine	Pteridines and derivatives	80402	47965	72702	60551	57982	48335	60822	77700	64816	71610	74920	62315	0.992006	1.12025	0.163826	insig
MEDP585	Stearidonic Acid	Lipids_Fatty Acids	1246	709.49	2072.1	1497.5	1955.4	2535.6	2422.2	37170	696.44	1945.6	2034.1	621.31	0.487342	4.48175	2.16406	insig
MEDP586	N-Acetylphenylalanine	Organic Acid And Its Derivatives	48663	75265	59171	70501	63074	66631	71231	62988	65237	65019	66359	62165	0.371907	1.02529	0.0360328	insig
MEDP587	N-Alpha-acetyllysine	Organic Acid And Its Derivatives	206700	144270	182360	138490	160790	180950	127170	225360	276720	115060	221280	299450	0.763274	1.24812	0.319752	insig
MEDP590	p-Mentha-1,3,8-triene	Lipids_Fatty Acids	1548700	9120300	8744600	12587000	1522400	10033000	10522000	1322000	1259200	1575200	1429200	10120000	0.875376	0.602158	-0.731786	insig
MEDP592	3-keto-Sphinganine	Organic Acid And Its Derivatives	6069.9	6010	7463.1	8428.3	3649.7	6814.1	3786.1	2977.2	3595.6	14930	5470	21854	0.115498	1.36888	0.452992	insig
MEDP594	Dihydroactinidiolide	Benzene and substituted derivatives	121130	38996	82166	80943	137080	67985	133370	248640	145750	106680	112480	52106	1.01064	1.51245	0.596885	insig
MEDP603	Cuminaldehyde	Lipids_Fatty Acids	1971100	2417600	2237300	1881000	2121200	2432300	3623400	2166000	3515500	3039100	2330300	2667300	1.64638	1.32779	0.409027	insig
MEDP606	2-(3,4-dimethoxyphenyl)ethanamine	Benzene and substituted derivatives	10675000	11027000	10664000	12041000	10959000	12632000	17821000	14369000	12758000	13333000	12817000	11771000	1.67069	1.2187	0.28534	insig
MEDP611	N-Acetyl-L-Histidine	Organic Acid And Its Derivatives	7738900	10132000	16015000	10926000	8826400	11755000	15592000	11517000	2942800	11130000	12399000	14269000	0.156815	1.03757	0.0532017	insig
MEDP612	(S)-2,3-epoxysqualene	Terpenoid	2582.4	11161	2118.4	2185.7	14444	2414.5	23300	1056.6	3217.4	1514.2	2543.3	2366.7	0.446046	0.973993	-0.0380167	insig
MEDP617	2-Furoylglycine	Amino Acid metabolomics	1681500	1952900	3749500	2167100	1975000	1930000	2047300	1369500	1877100	1094500	1942700	1446600	1.35834	0.726642	-0.460683	insig
MEDP618	2-Methylbutyroylcarnitine	Lipids_Fatty Acids	61808000	86088000	77123000	79253000	60931000	61403000	36260000	56473000	46332000	48617000	38327000	31606000	2.09785	0.603871	-0.727688	insig
MEDP627	Isonicotinic acid	Organic Acid And Its Derivatives	122210000	107990000	101160000	100820000	118040000	89242000	137070000	122860000	116800000	115080000	123180000	125760000	1.67836	1.1584	0.212128	insig
MEDP630	Methyl jasmonate	Lipids_Fatty Acids	10708	10125	6922.9	9164.3	15424	8223.4	14943	6861.2	10158	10625	14261	11311	0.567421	1.12534	0.170362	insig
MEDP631	Dimethyl fumarate	Lipids_Fatty Acids	25012000	20977000	18909000	21298000	22635000	13261000	26208000	22346000	22722000	27404000	22584000	22006000	1.24053	1.17346	0.230768	insig
MEDP636	Furfural	Organic Acid And Its Derivatives	16012	48634	13259	48155	12541	9721.6	10148	19978	11903	40441	33343	15170	0.0781869	0.883095	-0.179359	insig
MEDP638	LysoPE(16:1(9Z)/0:0)	Lipids_Fatty Acids	20966	17449	8144.6	10573	9050.8	6957.8	13257	19547	21943	13740	18385	20736	1.47757	1.47124	0.557029	insig
MEDP642	3-Hydroxy-DL-kynurenine	Amino Acid metabolomics	54438	29475	15248	49882	32510	23925	37762	27931	26581	7248.9	11270	6397.2	1.31286	0.570329	-0.810133	insig
MEDP650	4,4'-Methylenedianiline	Benzene and substituted derivatives	782.39	982.8	709.62	1334.2	1369.5	1254.4	1076.3	948.34	2612.5	1015.7	2539.3	825.8	0.767292	1.40184	0.487326	insig
MEDP651	Diphenyl ether	Benzene and substituted derivatives	27277	3999.6	4591.2	13388	1649.8	19057	3138.8	28934	30154	29785	29085	29234	1.19074	2.14873	1.10348	up
MEDP653	Benzylcinnamate	Benzene and substituted derivatives	59067	54921	66827	59778	52788	45717	48120	71129	58827	50545	55826	47569	0.229861	0.979115	-0.0304495	insig
MEDP654	2-Phenylacetamide	Benzene and substituted derivatives	3456.7	27308	1388.4	13496	5204.6	4576.5	2894.1	9561.8	3857.1	5252.3	8239	3080.3	0.313309	0.593261	-0.75326	insig
MEDP656	Isoamyl butyrate	Fatty acyls	136430000	126440000	135020000	152450000	127850000	132790000	142680000	140240000	131490000	144060000	121990000	151440000	0.48977	1.0258	0.0367438	insig
MEDP658	Ethyl dodecanoate	Fatty acyls	3556200	3626700	3589400	3690000	3423400	3522900	3213500	3100700	3131000	3132200	3215200	3255700	2.36608	0.88975	-0.168528	insig
MEDP659	Propylpropionate	Fatty acyls	49077000	52917000	46857000	40462000	49654000	51423000	39710000	50026000	40732000	45962000	45199000	36104000	1.33716	0.887541	-0.172115	insig
MEDP668	m-Cresol	Phenols And Its Derivatives	312290	389370	387870	388740	394890	339700	276430	315600	227930	334840	319010	205830	1.80091	0.759036	-0.39776	insig
MEDP676	Butyl 3-methylbutanoate	Fatty acyls	74827000	77139000	84496000	91189000	85613000	82060000	84826000	86581000	79592000	90108000	83930000	87419000	0.786049	1.03459	0.0490556	insig
MEDP681	2,2,2-Trichloroethanol	Alcohol	13676000	13700000	13531000	13612000	14365000	14343000	13482000	12419000	12098000	12568000	13022000	12403000	2.10203	0.913069	-0.131204	insig
MEDP685	Methylcysteine	Amino Acid metabolomics	263840	415570	704280	195920	224130	303820	695270	347060	194340	297320	583770	280230	0.356963	1.1378	0.186252	insig
MEDP686	2-Acetylfuran	Heterocyclic compound	22166000	26111000	25525000	25770000	25111000	23787000	18614000	25744000	21724000	25710000	24689000	22849000	0.87926	0.938439	-0.0916655	insig
MEDP688	Benzophenone	Benzene and substituted derivatives	52700	58786	50737	65114	61360	67567	54290	55316	71489	63005	66610	55493	0.308149	1.0279	0.0396969	insig
MEDP692	Triethylamine	Hydrocarbon derivative	34703	347360	252400	173040	20017	72361	42854	43918	131730	29112	53944	107470	0.70134	0.454536	-1.13753	insig
MEDP695	Methyl tetradecanoate	Fatty acyls	11381	1426	1310.4	1817.1	15491	9570.1	11865	13095	1817	1365.2	11234	1420.1	0.00539738	0.995139	-0.00703076	insig
MEDP697	2,6-Di-tert-butyl-4-methylphenol	Benzene and substituted derivatives	1035200	656540	872430	935080	790900	781390	1023000	645140	890070	647450	1259100	891610	0.222275	1.05616	0.0788317	insig
MEDP700	Methyl beta-D-galactopyranoside	Carbohydrate metabolomics	700400	858500	815600	589990	689520	737010	948460	782350	770140	836220	1027100	759250	1.35788	1.16682	0.222579	insig
MEDP701	(E)-2-Octen-1-ol	Alcohol	15276000	14157000	14260000	11922000	14402000	11783000	14075000	13465000	12553000	14851000	13666000	15507000	0.469528	1.02833	0.0402966	insig
MEDP707	2-Pentadecanone	Ketones	1852700	1929300	1922000	1819700	1929900	1866800	1815400	1786800	1812200	1941100	1824900	1855800	1.14094	0.974895	-0.0366814	insig
MEDP709	Methyl dihydrojasmonate	Organic Acid And Its Derivatives	2876200	2807900	2791700	2722000	2754500	2748400	2642100	2585800	2633400	2865500	2712500	2773600	1.18349	0.970792	-0.0427664	insig
MEDP718	Methylisobutyrate	Organic Acid And Its Derivatives	1014400	634380	716290	705930	950750	453050	776620	842280	564150	753310	596270	828380	0.00606615	0.974571	-0.0371609	insig
MEDP719	N-Nitrosodiethylamine	Polyamine	1008600	717720	805870	686470	1011300	526850	794240	791330	607150	750350	553670	844470	0.463688	0.912631	-0.131897	insig
MEDP724	3,5-Dinitrosalicylic acid	Organic Acid And Its Derivatives	1427000	1484300	1954900	1457700	1342700	1338400	1369400	1322300	1306600	1296500	1330100	1359600	1.30283	0.886674	-0.173524	insig
MEDP729	Barbituric acid	Heterocyclic compound	15097000	14201000	13504000	12058000	11565000	12329000	14733000	11779000	12584000	13864000	14808000	14777000	0.634158	1.04814	0.0678276	insig
MEDP752	DL-Leucine	Amino Acid metabolomics	101390000	129910000	121480000	112260000	128910000	152610000	171760000	136830000	152390000	150410000	131730000	139950000	1.53649	1.18285	0.24227	insig
MEDP767	Aspirin	Organic Acid And Its Derivatives	239880000	252540000	256960000	270580000	253530000	237290000	247270000	249690000	251330000	279910000	272070000	264870000	0.915721	1.03598	0.0509981	insig
MEDP775	Sulfamethazine	Benzene and substituted derivatives	2049.6	8752.9	1234.5	828.01	3932	2198.6	1894.8	1041.3	2321.4	1313.1	1006.5	10109	0.229704	0.931062	-0.10305	insig
MEDP778	Ethyl butyrate	Fatty acyls	20652000	22064000	22702000	21702000	22012000	21138000	20900000	19798000	22006000	25256000	23103000	24010000	0.666235	1.03687	0.0522344	insig
MEDP789	2-Pentyl-3-phenyl-2-propenal	Aldehyde	124180	124160	137540	133760	123090	148260	145560	137450	135900	140850	144770	141470	1.39246	1.06955	0.0969982	insig
MEDP792	Pyrrolidine	Heterocyclic compound	294290	387080	463580	261160	274660	433820	622780	435660	400190	554180	469440	468180	1.67609	1.39527	0.480547	insig
MEDP794	Octanal	Aldehyde	6621500	6143400	5885300	5391100	6475100	4851100	6636200	5329600	6402500	6716600	6197900	6869600	0.956279	1.07874	0.10935	insig
MEDP796	Pyrene	Benzene and substituted derivatives	138200	145440	155270	148650	154560	150870	166840	162130	150140	166190	163810	165410	1.89415	1.0913	0.126048	insig
MEDP799	(-)-Menthone	Ketones	4701400	5114800	5154300	4988300	4970000	4949300	4649400	3980000	4634800	4274400	4978000	4574800	1.71354	0.906731	-0.141253	insig
MEDP802	Diclofenac	Benzene and substituted derivatives	137620	144380	147910	135040	138850	143830	120670	113030	118920	125360	125930	122820	2.29953	0.857367	-0.222015	insig
MEDP812	5-Methylfurfural	Aldehyde	1199000	1322300	1183000	1118800	1353100	1171300	1255300	1073000	1326300	1359200	1287300	1422600	0.74994	1.0512	0.0720387	insig
MEDP814	Methyl Valerate	Fatty acyls	878340	671330	178750	106230	170300	675670	299490	163300	392980	333720	150890	435640	0.346089	0.662541	-0.593919	insig
MEDP817	Propyl Hexanoate	Fatty acyls	9373100	8984400	10591000	11192000	10395000	10180000	10146000	10044000	10479000	11026000	11183000	8121900	0.0054118	1.00468	0.00674201	insig
MEDP818	1-Pentadecanol	Alcohol	1799500	1750800	1807700	1824800	1689100	2240200	1612500	1637400	1612200	1702100	2174500	1699300	0.79843	0.939336	-0.0902862	insig
MEDP823	(R)-2-Hydroxy-3-phenylpropionic acid	Organic Acid And Its Derivatives	1885.5	1681.3	1584.9	2402.4	32071	2257.2	2240.1	4877.9	4109.3	1694.7	48024	2990.4	0.474477	1.52657	0.610297	insig
MEDP831	1-Aminopropan-2-ol	Alcohol	254700	628670	670060	1117600	610350	1403400	432310	456510	601130	934780	1677300	2367500	0.511237	1.38097	0.46568	insig
MEDP836	Dibutyl phthalate	Benzene and substituted derivatives	24159000	24112000	23909000	26406000	25967000	24533000	23683000	23100000	23943000	23126000	24769000	24334000	1.34789	0.958876	-0.0605837	insig
MEDP843	Ethyl Isobutyrate	Fatty acyls	16092000	110620	2231400	2880700	30110000	24875000	21413000	538670	3156800	20916000	43075000	23455000	0.527328	1.47516	0.560874	insig
MEDP844	Furfuryl alcohol	Alcohol	19586000	19521000	19989000	21217000	20089000	18819000	20976000	20160000	20183000	21828000	21034000	23090000	1.5559	1.06752	0.0942653	insig
MEDP845	1-Phenylethanol	Benzene and substituted derivatives	255950000	246810000	220950000	243000000	246310000	182320000	281250000	255510000	243710000	270210000	252720000	258470000	1.40571	1.11935	0.162658	insig
MEDP849	Nα-Acetyl-L-glutamine	Amino Acid metabolomics	238990	258440	3176800	820450	267280	591650	2618000	2400200	221740	356800	2568000	3664700	0.994687	2.20962	1.1438	insig
MEDP853	Choline chloride	Others	2954600	5517500	4598000	5366000	10924000	6481700	6339500	3686700	3757300	3822300	3064200	4250600	1.11664	0.695294	-0.524304	insig
MEDP859	Glycylphenylalanine	Amino Acid metabolomics	4946000	8111700	5726900	5287600	4677200	6707800	7547400	8360000	17317000	7226100	5750100	5826900	1.20119	1.46733	0.553196	insig
MEDP873	3'-UMP	Nucleotide metabolomics	15356	1697.4	1543.1	3906	1761.9	1676.4	2647	17827	16041	1386.7	1656.1	6076	0.700384	1.75915	0.81488	insig
MEDP874	tryptophan betaine	Organic Acid And Its Derivatives	52808	72039	242580	42009	67291	144410	104670	128920	46713	77959	133460	208940	0.499713	1.12803	0.173807	insig
MEDP876	O-Succinyl-L-Homoserine	Amino Acid metabolomics	38005	32985	63992	74741	71570	56806	38845	40810	54965	51732	36830	48685	0.873473	0.804105	-0.314545	insig
MEDP878	N-Methyl-L-Glutamate	Amino Acid metabolomics	1327200	5537800	3081200	2665900	2539600	8892300	1462100	5707200	10599000	4664200	1603400	3049500	0.128494	1.12649	0.171838	insig
MEDP879	N-Methyl-D-Aspartic Acid	Amino Acid metabolomics	537380	633600	1749800	483750	631080	1291000	708650	1672000	522200	2132100	1115700	788080	0.663703	1.30265	0.381454	insig
MEDP881	Phosphocholine	Nucleotide metabolomics	34128	49119	21376	53887	30858	50150	14320	9988	111370	94043	158330	57504	0.404946	1.86022	0.895469	insig
MEDP883	2,4-Dihydroxypteridine	Pteridines and derivatives	42486	48466	46493	51986	40337	63402	55560	48723	56197	53457	40405	36671	0.105826	0.992642	-0.0106539	insig
MEDP885	Mesoxalate	Organic Acid And Its Derivatives	50536	172580	281650	289960	501900	758730	120540	153030	210470	575160	797280	555310	0.336591	1.17342	0.230716	insig
MEDP886	N-Amidino-L-Aspartate	Organic Acid And Its Derivatives	20038	824630	449120	416290	688010	16701	472780	27462	1046600	441530	388430	21057	0.0204481	0.992989	-0.0101503	insig
MEDP888	2'-Deoxycytidine 5'-Diphosphate	Nucleotide metabolomics	1806.4	2746	1981.5	1289.7	3701.9	2404.2	1812.2	2293.8	2422.7	1752.3	5604.7	2649.1	0.477183	1.18702	0.247341	insig
MEDP902	Omega-Hydroxydodecanoic Acid	Lipids	13341	10867	9905.6	12178	9003.3	9349.7	7808.9	10457	11052	7930.7	7155.5	6993.3	1.48155	0.795076	-0.330834	insig

## Sheet: Table S4
Table S4. The supported information of PCA scores plot of serum metabolome distribution according to the diet of goats
	PC1	PC2	PC3	PC4	PC5	PC6	PC7	PC8	PC9	PC10	PC11	PC12
Standard deviation	10.2536	8.00879	7.19931	6.53955	6.37323	6.02319	5.53386	5.24351	4.88587	4.6774	4.40032	1.04235e-14
Proportion of Variance	0.22659	0.13823	0.1117	0.09217	0.08754	0.07819	0.066	0.05926	0.05145	0.04715	0.04173	0
Cumulative Proportion	0.22659	0.36482	0.47652	0.56869	0.65623	0.73442	0.80042	0.85967	0.91112	0.95827	1	1
CON1	-4.2577	6.08452	4.86534	-2.14574	15.0051	-0.565056	4.19941	-4.30559	-1.3592	5.27794	-3.45524	1.08247e-14
CON2	-10.7116	3.35605	-1.77662	2.55434	-7.66073	-5.28185	12.2385	-1.55163	-1.67697	-4.56414	-2.56776	1.25455e-14
CON3	-9.64077	0.320798	4.69772	2.0082	-1.05119	2.79282	2.17284	9.24426	9.43516	4.32542	3.37633	1.04083e-14
CON4	-11.7238	3.01796	2.32641	-4.18478	-4.8047	3.38827	-4.04791	1.49162	-10.6113	3.4184	5.14736	1.00892e-14
CON5	-9.85606	2.83555	-14.2457	1.37506	7.12203	-1.33862	-6.62691	3.9475	0.560744	-6.09503	-1.11422	1.05957e-14
CON6	-9.7556	-5.56594	2.05186	-3.46129	-5.11642	3.82985	-5.89395	-10.9992	5.99501	-0.612581	-2.09948	1.06026e-14
ASL1	3.57799	-4.71443	8.87913	15.1158	-0.159308	-6.83475	-5.78773	0.27288	-2.38421	-0.112235	-1.57196	9.90874e-15
ASL2	12.8791	6.02814	0.132689	6.16537	-0.207379	14.9736	2.3169	-0.582492	-0.982218	-3.71911	-0.404186	8.88178e-15
ASL3	14.4323	16.5878	1.14974	-6.339	-5.13195	-6.91616	-4.04893	0.304386	2.74698	0.523323	-0.501217	8.38218e-15
ASL4	10.1124	-6.75279	-13.9133	3.3959	-1.20116	-2.20628	2.9076	-3.71166	0.313124	7.46494	4.1679	9.92262e-15
ASL5	7.62284	-9.01095	5.90824	-6.62135	5.4029	-3.13335	2.43928	-0.6341	0.338896	-7.24074	7.57905	8.25728e-15
ASL6	7.32075	-12.1867	-0.0754843	-7.86253	-2.19722	1.29151	0.130851	6.52398	-2.37605	1.3338	-8.55658	6.71685e-15

## Sheet: Table S5
Table S5. The supported information of PCA scores plot of muscle metabolome distribution according to the diet of goats
	PC1	PC2	PC3	PC4	PC5	PC6	PC7	PC8	PC9	PC10	PC11	PC12
Standard deviation	8.70141	8.30572	7.41497	6.74038	6.27786	6.06033	5.87514	5.48396	5.01607	4.71523	4.55646	7.20072e-15
Proportion of Variance	0.16677	0.15195	0.12111	0.10007	0.08681	0.0809	0.07603	0.06624	0.05542	0.04897	0.04573	0
Cumulative Proportion	0.16677	0.31872	0.43983	0.5399	0.62671	0.70761	0.78364	0.84988	0.9053	0.95427	1	1
CON1	-4.9534	10.1742	-8.38616	7.33848	-5.92724	3.63881	-1.94317	1.32522	-8.45413	-5.81856	-0.482292	4.42701e-15
CON2	-5.02812	3.68344	-3.19888	-4.71214	-4.65311	3.74403	9.27062	6.14046	-0.132403	9.31431	-2.49754	6.50174e-15
CON3	-10.6311	-3.29815	0.779166	3.6874	-1.36443	-0.704838	10.0565	-3.47593	7.60803	-6.21276	3.79486	6.30052e-15
CON4	-6.15649	11.2482	0.252682	1.8317	11.2551	-12.0649	-1.25026	0.971715	-0.794419	2.67132	1.23524	7.27196e-15
CON5	-6.91388	1.34989	-8.40344	-5.78938	-0.0416657	3.77826	-9.88995	-6.1443	7.04312	1.20216	-4.29662	6.55032e-15
CON6	-8.66608	0.013107	17.6642	-7.82472	1.03885	5.33492	-3.6712	1.45788	-3.73023	-2.26128	0.680554	7.16094e-15
ASL1	2.14475	-13.8944	-6.90609	-10.3501	-1.04097	-7.1889	1.97219	-3.43508	-6.92752	-1.5439	0.961579	6.7446e-15
ASL2	7.08441	0.623672	7.66833	3.89637	-13.3962	-9.34196	-4.06135	0.566381	3.12949	1.27757	-1.64484	6.21725e-15
ASL3	19.4251	11.8644	1.48687	-5.02955	2.70755	3.92397	4.62333	-5.5228	0.936418	-1.90043	0.736948	4.91621e-15
ASL4	7.28656	-4.91071	-4.86815	-1.01851	2.84826	2.2317	-4.72619	12.4678	4.2672	-2.51316	5.4172	8.60423e-15
ASL5	1.8874	-7.38151	1.29641	9.95925	1.60538	5.12944	-2.62088	-6.10703	-2.48238	7.41936	6.58882	4.94049e-15
ASL6	4.52079	-9.47217	2.61509	8.01123	6.96853	1.51945	2.24033	1.75569	-0.463175	-1.63462	-10.4939	5.20417e-15
