# Supplementary figures and images for: Feeding Aquilaria sinensis Leaves Modulates Lipid Metabolism and Improves the Meat Quality of Goats
Source: MDPI journal article supplement (doi:10.3390/foods12030560), 2023-01-27

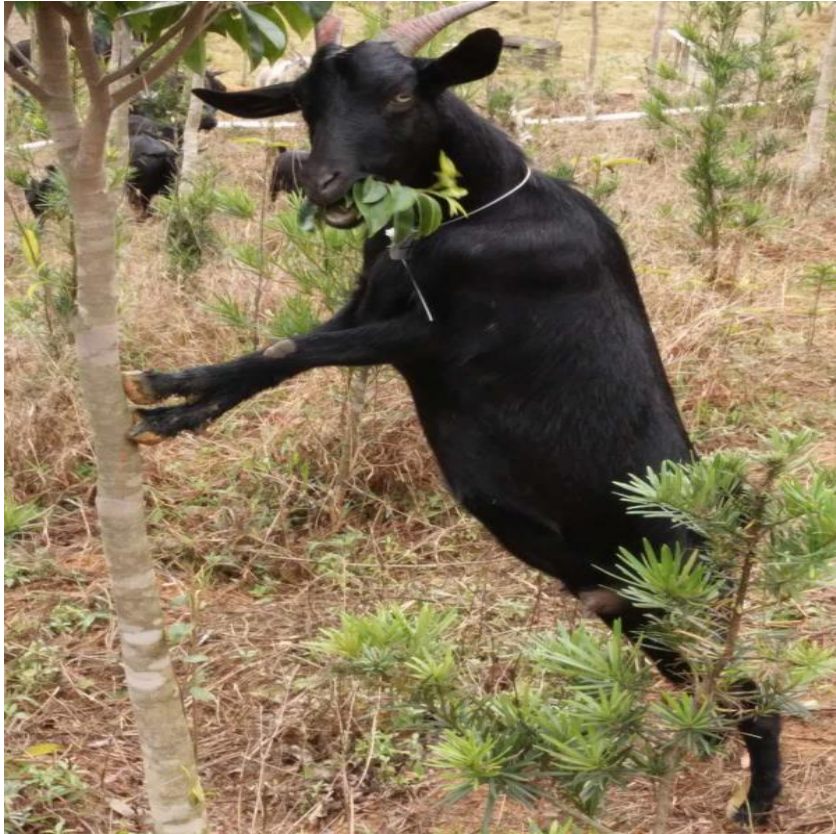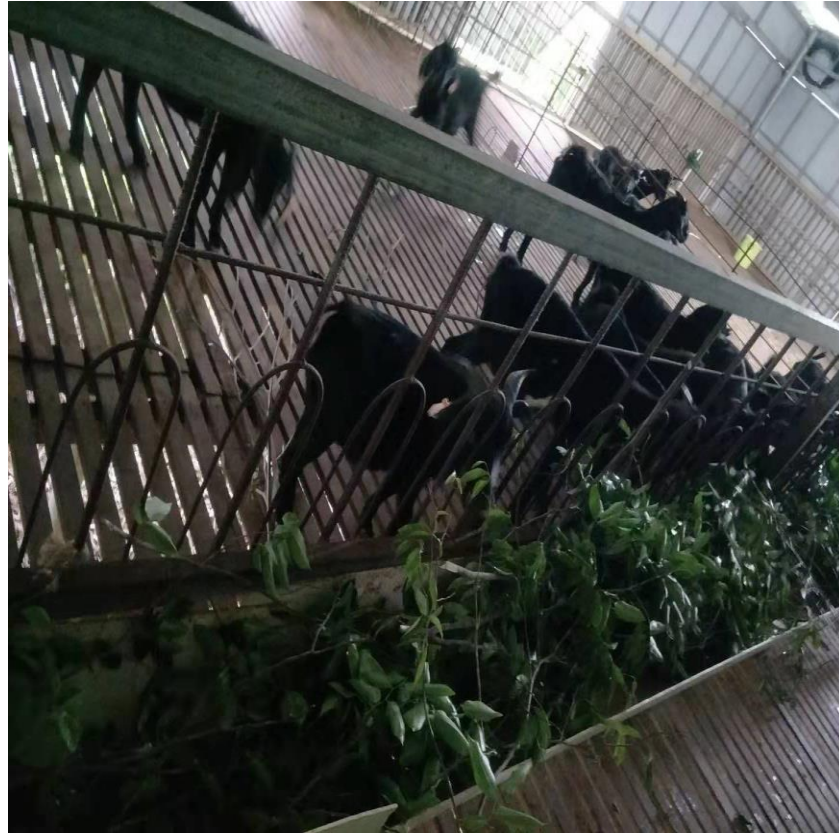

Figure S1. The goats would like to ingest *Aquilaria sinensis* leaves.

Supplement: s1 [file s1]
